# Supplementary material for: Genome-wide identification and characterization of the sucrose invertase gene family in Hemerocallis citrina
Source: PeerJ. 2024 Aug 29;12:e17999. doi: 10.7717/peerj.17999 (PMC11366234; doi:10.7717/peerj.17999)
Supplement: Supplemental Information 7 [file peerj-12-17999-s007.xlsx]

## Sheet: Sheet1
>HcINV1
SPAISYGYLPSSNHDGSQPKHASSRSHVKLLCAAISSAALLLALVAFVYSSGWDMSPLPLPDPVVGWTDRGVKAGVSSKSSGAHLLGSGPYPWTNKMLSWQRTGFHFQPENNWMNDPNGPMYYKGWYHFFYQYNPSSPVWGNISWGHAVSRDLLHWFHLPVAMDRDQWYDIKGVWSGSATILPDGRIIMLYTGITSEEVQVQNVAVPANTSDPLLINWIKADANPVMLPTRGIGEQDFRDPTTAWYEASDSTWRIVIGSQNRSSSHNGLAVVYSTKDFLSYTLLPGMLHSVPKVGMWECIDFYPIATSGSHARNGLDTSSTPSNEVKHVLKASTQDDGNDYYSIGTYDPEANKWIPDDKSADVGIGLRYDWGKFYASKTFYDQAKQRRILWGWVAEADS…
>HcINV2
MAPRDIESPPISYDSLPSSNHNGSQPEHTSSRSYVKLLCVAISSAALLLALVAFVYSSGWDMSPSPLPDPVVGWTDRGVKAGVSSKSSGAHLLGSGPYPWTNKMLSWQRTGFHFQPENNWMNDPNGPMYYKGWYHFFYQYNPNSPVWGTTSWGHAVSRDLLHWSHLPVAMVPDQWYDIKGVWSGSATILPDGRIIMLYTGITFEEVQVQNVAVPANTSDPLLINWIKADANPVMLPTRGIGEQEFRDPTTAWYEASDSTWRIVIGSQNTSSSHSGLAVVYSTKDFLSYTLLPGMLHSVPQVGMWECIDLYPIATSGSHARNGLDTSSSPSNEVKHVLKASTIDDKNDYYSIGTYHPEANKWIPDDKSADVGIGLRYDWGKFYASKTFYDQAKQRRVLWG…
>HcINV3
MLINNPANRYNTSSDTWRVLIGSETPDTYGIVLLYDTKDFLNYTLFPNLLHATPVKVGMLECVDFYPLATSSSQSGNALELQKVLDEPNKEVKYVIKASMNDERHDYYAIGTFDLATFTFKTDDPTIYVGVGLRYDWGKFFASKTFFDPVKKRRVLWGYVGEVDSREDDILKGWASLQNIPRTVLFDTKTGSNLLFWPIEEVEALRTSQKEFNDITVGTGSTHELSVGEASQLDIEAEFEINKDEIEATVEADVTYNCSTSGGASNRGQLGPFGLLTLANKKRTEQTATYFYITRRPDGSLRTHFCQDELRSSKANDVTKRVVGTVVPVLDGETFKLRMLVDHSIIESFAQGGRAVATSRVYPTEAISNATRVFIFNNATGANVIAKSVKIWHMNSTVI…
>HcINV4
MGSSAVAESYAPLLDSPAPSTSTTSSNKLRVWSLVLSGMLVLVFALAGLIYTNPGLVSGLNLQPEPVRTDGRLQDFSWTNEMLSWQRTGFHFQPEKNFQSDPNAPMYYKGWYHFFYQYNPNGTYWDFSISWGHAVSRDLIHWLILPLAMQPDHWYDIRGTWTGTATLLPDGHIVVLYTGGTKELVQVQNLAVPADPNDPLLLKWNKYNANPILRPPPGIGDRDFRDPFPIWYNTSSDTWRVLIGSKNADYYGIVLLYNTKDFMNYTLLPTLLHTTAEKVGMLECVDLYPLATASSQSGNALELQKVLDESNTEVKYAMKASMDDERHDYYAIGTFDLATFTFTTDDPTIDVGVGLRYDWGKFYASKTFFDPVKKRRVLWGYVGEVDSREDDILKGWACL…
>HcINV5
VNLAVAANASDPFLIDWVKYEHNPVLQPPPFVKLKDFRDPNPIWYNATDGTYFVVVGSKDDRIQHSGTALVFTTKDFINFTLLPGVLHSFPIVGMWECVEVYPVATQGPKINQGLDTWGEPEEHVKHVLKAGMNDEWHDYYALGTYDPAANKWTPDDESLDLGIGLRYDWGKLYAARTFYDPVKKRRVLWGYVGETDSREADIQKGWASFQIIPRTILFDVKTGSNLLLWPIEEIESLRTNRKDFSDITVGVGSTVQLDVGDANQVNSSFRPIQKFLYELN*
>HcINV6
MIIFYLDGWLALLRYLDPSAPMYYNGWYHLFYNHNPRAAYWEKIVWGHGVSQDLVNWIHLPIALVPEHWYDIDGIWSGSAVTLADGRVIILYTGCTNTMSNEMISQVVNLAVPANASDPFLIDWVKYEHNPVLQPPPFINLIDFRDPNPIWYNATDGTYFMVVGSKDARIQHRGIALVFTTKDFINFTLLPGVLHSVPMGGMWECVELYPVATQGPKINQGLDTLGEPEEHVKHVLKVGINDEWHDYYALGTYDPAANKWTPDDESLDLGIGLRYDWGKFYASRTFYDPAKKRRVLWGYDGETDTREADIQKGWASFQAIPRTILFDVKTGSNLLLWPIEEIESLRTNRKDFSDITVGAGSTVQLDVGDANQLDIEVEFEFSALNLDDLIEADVTFNCS…
>HcINV7
MIIFLLDGCLALLRYLDPSAPIYYKGWYHFFYNHNPRAAYWEKIVWGHGVSQDLINWIHLPLALVPDHWYDIDGIWTGSAVTLADGRVVILYTGGTNTMSNEISQVVNLAVAANASDPFLIDWVKYEHNPVLQPPPFIKRKDFRDPNPIWYNATDGTYFVVVGSKDDRIQHSGIALVFTTKDFINFTLLPGVLHSVPIVGMWECVELYPVATQGPRINQGLDTWGEPEEHVKHVLKAGMNDEWHDYYALGTYDPAANKWTPDDESLDLGIGLRYDWGKFYAARTFYDPAKKRRVLWGYVGETDNREADIQKGWASFQAIPRTVLFDVKTGSNLLLWPIEEIESLRTNRKDFSDIMVGAGSTVQLDVGDANQLDIEVEFEFSALNLDDVNEADVTFNCSA…
>HcINV8
MGSSDVEAYAPLLDSPTPSPTTTTTSSSNKLRVLSLVLSGLLVLVLALAGLIYTNPGLVSGFKLQPEPVRTDGGLQKDFSWTNEMLSWQHTGFHFQPEKNFQSDPNAPMYYKGWYHFFYQYNPNGTYWDYTISWGHAVSRDLIHWLILPLAMQPDHWYDIKGTWTGTATLLPDGHIVVLYTGGTEELVQVQNLAVPADPNDPLLLKWNKYNANPILRPPPGVGDRDFRDPFPIWYNTSSDTWRVLIGSKNADYYGIVLLYDTKDFMNYTLLPNLLHTTAEKVGMLECVDFYPLATTSPQSGNALELQKALTEGNKEVKYAMKGSLDDERHDYYAIGTFDLATFTFTTDDPTIDVGVGLRYDWGKFYASKTFFDPVKQRRVLWGYVGEVDSREDDILKGW…
>HcINV9
MGVCDLSILEAVCGATSSRHLFAATTTTSSSCSSSCSWPFKGHTRSKKKKRCSSVYMMKAAALPFSRLSSSAAAAACCLRIKCKCKCEWNEGKTGEDNGGGGWIKDATTKSQSQFFDEVVIGNNNNNNGDDDEASKDKMMMMKKKKKSYSAEVEDDAWRLLEESMVYYCASPVGTIAAKDPTDGNTLNYDHVFIRDFIPSGIAFLLKGDYDIVRNFILHTLQLQSWEKTMDCHSPGQGLMPASFKVRTIPLDGDETATEEVLDPDFGESAIGRVAPVDSGLWWIILLRAYGKCSGDLTVQERIDVQTGIKMILKLCLADGFDMFPTLLVTDGSCMIDRRMGIHGHPLEIQALFYSALLCAREMLAPEDGSADLIRALNNRLLALSFHIREYYWIDMKKL…
>HcINV10
MEFVVSKNYRSAYHFQPPKNWMNDPNAPMYYKGHYHLFYQYNPDAAVWIPALSWSHSVSTDLIHWTGLGLALTPSDPFDINGCWSGSATLLPSDKPVILYTGLDTDGRQVQNVAYPKDLSDPLLSEWTKPDHNPIIEPFEGLNVTSFRDPTTAWLGQDGLWRILVGAELNNDGHAILYKSKDFVSWVRANDPLHCTIGSGMWECPDFFPLGEGKYVLKISFYDTFTEHYTIGRYDEERDVFVGEHSSSNDFKMWPRVDHGRFYASKSFEDEKKRRILWGWSNEADSKDDATAKGWAGVQTIPRVVSLDASGKQLVQWPIEEIESLRGKHIHLTDIDLKPGALVEIKGLTASQADVEVEFELDIILVDKAEPFEPNWLVDPPKLCHEKRSSSVDGGVGPF…
>HcINV11
MVAWLCYWSSSGVVNGSHIVYEELQSVPATVVDNKYKTGYHFQPPKHWINGPMYYNGIYHFFYQYNPYGAVWGNIVWAHSVSKDLINWEMVEPAIHPSKPFDINGCWSGSATILPGNKPVILYTGVDPKHRQVQNIAFPKNLSDPYLREWVKPDYNPIIDPVEGINVTEFRDPTTAWMGQLDHHWRLVIGGLRKHRGMAIMYRSKDFIHWIRAKHPLHSANGTGMWECPDFFPVSTSSSGLLKYSGGQGLKYVFKVSLDLTRYEYYTLGTYNLDLDKYIPDVGSVDNGSGLRYDYGNFYASKTFYDAGKNRRILWGWSNESDTRHDDVAKGWAGIQAIPRTIWLDDNKKQLILWPVEEVEGLRGKMVTVKDKKLKYGDLVEISGIMTSQADVEVTFQLS…
>HcINV12
MESNGRTSTWNEVEDDLELPRVHVRQRSFDERSLSELTISHLKVGDGYESIYSPGVGTRSVWDTPGWGRGPFEPHPMVGEAWEALRRSLVYFRGQPLGTLAAIDHASEEVLNYDQVFVRDFVPSGLAFLMNGEHDIVKNFLLKTVHLQGWEKRVDRFKLGEGVMPASFKVLHDPVRKTDTVVADFGESAIGRVAPVDSGFWWIILLRAYTKSTGDLSLAETPECQKGMRLVLALCLSEGFDTFPTLLCADGCSMIDRRMGVYGYPIEIQALFFMALRCALAMLKHDAEGKEIIERIVKRLHALSYHMRSYFWLDFQQLNDIYRYKTEEYSHTAVNKFNVIPESIPDWVFDFMPTRGGYFIGNVSPAKMDFRWFALGNCIAILSSLATPEQSAAIMDLIE…
>HcINV13
LSKSHSFFPPSSEICVFLHVEVKQEVESFLIHANLEAMESIWNEVEDDLGLPRLHVRQRSFDERSLSELTISHLKAGDGYESIYSPGAGTRSVWDTPGSGRGPFEPHPMVGEAWEALRRSLVYFRGQPVGTLAAIDHASEEVLNYDQVFVRDFVPSGLAFLMNGEHDIVKNFLLKTVHLQAWEKRVDRFKLGEGVMPASFKVLHDPVRKTDTVVADFGESAIGRVAPVDSGFWWIILLRAYTKSTGDLSLAETPECQKGMRLVLALCLSEGFDTFPTLLCADGCSMIDRRMGVYGYPIEIQALFFMALRCALAMLKHDAEGKEFIERIVKRLHALSYHMRSYFWLDFQQLNDIYRYKTEEYSHTAVNKFNVIPESIPDWVFDFMPTRGGYFIGNVSPAK…
>HcINV14
MYYNGIYHFFYQYNPYGAVWGNIVWAHSVSKDLINWEMVEPAIYPSKPFDINGCWSGSATILPGNKPVILYTGVDPQHRQVQNIAFPKNLSDPYLREWVKPDYNPIIDPVEGINATEFRDPTTAWMGQDRHWRLVIGGLRKHRGMAIMYRSKDFIHWIRAKHPLHSANGTGMWECPDFYPVTTTRKAAAGKLLEGHEDTTTSSEYYSSGLKYVFKVSLDLTRYEYYTLGSYHLDLDKYIPDDGSVDNGSGLRYDYGNFYASKTFYDAGKKRRILWGWSNESDTKNDDVGKGWAGIQAIPRAVWLDDNNRQLIQWPIEEIQGLRGKVVTVQDKKLRNGDVVEISGIMTSQADVEVTFQLSDLQKAEPFDPSWTDPQKLCEQKGATTAAGGGGVGPFGLLA…
>HcINV15
MAAGSLLPTLGWVFGLIFAGLELSRRNILVVSPPASDSSAAEFVVSKNYRTAFHFQPDHNWMNDPNAPMYYEGYYHLFYQYNPDSALWVSNISWGHSVSTDLVHWTGLGIAFSPSKPFDISGCWSGSATFLPGNKPVILYTGLDTEGGGVQNVAYPKNLSDPFLREWIKPDYNPLIKPFEGVNASWFRDPSTAWVGQDGLWRILVGLKLGNDGYAILYKSKDFVTWDRAEDPLHYTNGSGMWECPDFFPLGEEGKYVLKISFFDNFYERYTVGRYDEERDLFVGDDPSSNDYNLWQKVDHGSFYASKTFVEVNKNRRIMWGWSNESDSKPDDVAKGWSGVQTIPRIVSLDASGKQLVQWPIEEIESLRGKHIHLSNVELKPGSLHELEGLTASQADIEV…
>HcINV16
MTRSSLCTLGWVLGFFFVAVEFHRRNFLNPADSLAMEFVVSKQYRSAYHFQPPHNWMNDPNAPMYYKGYYHLFYQYNPDAAVWIPNITWGHSVSTNLIHWTGLGLALTPSDPFDINGCWSGSATLLPGNKPVILYTGLDTDSRQVQNVAYPKDLSDPFLHEWIKPNYNPIIEPFEGVNVSWFRDPATPWLGQDGLWRTLVGAEFGKDGHAVLYKSKDFVDWVRANDSLHFTLGSGMWECPDFFPLGDNKYVLKISFFDTFSEHYIIGRYDEERDVFVGQDSSSNDYKMWPRVDHGRFYASKSFEDEKKRRILWGWSHEADSKDDATAKGWSGIQTIPRVVSLDASGRQLVQWPIAEIESLRGKHTHLNDMELKTGGLHEIKGLTASQADVEVEFELDIN…
>HcINV17
MENPNGPMHYNGVYHLFYQYNPNAAIWGNISWGHSVSTDLIHWTGLEIALSPTEPSDINGCFSGSATILQDNNPVLMFTGIDKMNRQIQNIVFPKNVSDPFLREWITPAYDPLIQPVDGLNASQFRDPTTGWLGPDGLWRLAVGAEIKNRGRAMLYRSKDFVHWVRAKNPLQVTNGSGMWECPDFYSIKGKYVLKMSLGETRNDHYMLGKYDEETDVFVRDDPSDDYRMWRSQADDIAKGWAGIHTVPRVLSLDGNGKQLVQWPIKELESLRRKQIKADAEVEFELPILNGAEPFDPSWVLDPAMVCREKGASDGGAVGPFGLLVLASHDLEEHTAVFFRVFKANERYAVLMCVDQRSTTPMQQYGSVSTDLIHWIVLGLALTPSDPFDLKGCFSGSAT…
>HcINV18
SDPQYALLPDPSLVTTTKKSSGSWLVSLVVVAIAFVLLITALLQPARDEVVPRGGTGKTMIYRVMSRGVSNGVSEKSTAATLLLLSSEDGSYPWTNAMLAWQRTAFHFQPPKNWMNDPDAPLYYMGWYHLFYQYNPDSAIWGNITWGHAISRDLIHWRYLPLAMVPDHWYDRNGVWTGSATILTDNQIVIVYTGSTNETVQVQNLARPADPSDPLLHDWVKSDSNPVLLPPPGIGDQDFRDPTSAWFVKSESAWRIAIGSRNSKHDGIAFVYQTKDFVNYKLLPGLLHEVAGTGMWECLDFYPVSTTLAEGLDTSAEPGEGVKHVLKASLDDDKHDYYAIGEYDVAKNVWVPDDPENDVGIGLRVDYGKYYASKTFYDEVKERRVLWGWIGETDSEMND…
>HcINV19
MDATQGDDNKKTSGSYSSRLYDSTALMREAKLRIERHRSCDIQKSNDMYDIHHLAPSPTRKNLANSSIAEIAESLSLASCSNSPEVITKEGWEALRRALINFRGKPVGTIAAMDHSEEALNYNQGVYGYPIEIQALFFMALKCALFLLKNDAEGKEFVELIVKRLHALSYHIRTYYWLDFNQLNDIYRYKTEEYSHTAVNKFNVMPDSLPEWVFDFMPTHGGYFVGNVGPSRMDFRWFCLGNCIAILSSLASKEQSEAIMDLIEERWLELVGEMPLKVMYPAIEGHEWRIITGCDPKNTRWSYHNGGSWPGLIRISFEGPTGIIPPSPMFQGIYVLLWLLTAASIKTGRTQIAKRAVELAESRLLKDNWPEYYDGKLGKYIGKQARKLQTWSIAGYLVS…
>HcINV20
MDHGSLRWLVSLGVVAIALVLLVTARDGPEQVPHSCEPVYRVTSRGVSNGVSEKSTASLLSSREGSYPWTNAMLAWQRTGFHFQPPKNWMNVPAAPLYYKGWYHLFYQYNPDSPVWGNITWGHAISRDLIHWRYLPLAMLPDHWYDLNGVWTGSATILPDDQIIIVYTGSTNDAVQVQNLAMSADPSDPLLLDWVKSDSNPVLLPPPGIIGDQDFRDPTSAWFVKSESAWQMAIGSRNSKHDGIALLYQTKDFVNYQLLPGLLHEVAGTGMWECLDFYPVSTTSEEGLDTSAEPGEGVKHVIKASLDDDKHDYYAIGEYDVAMNRWVPDDPENDVGIGLRVDYGKYYASKTFYDEVKKRRILWGWTGETDSEMNDLLKGWASVQTIPRTVLFDKKTGSN…
>HcINV21
METLLGLRKVSSHASIADMEELDFEVMKLPKLNERQRSFDERSLSELTVNIRGSGDGYENVYSPRSGGHRSGFDTPASSVRNAFEPHPMVGEAWDALRKSMVYFRKEPVGTIAAVDHASEEVLNYDQVFVRDFVPSALAFLMNGEPDIVKNFLLKTVHLQGWEKRIDRFKLGEGAMPASFKVLHNPIRKTDTLVADFGESAIGRVAPVDSGFWWIILLRAYTKSTGDMTLAETPECQKGMRLILALCLSEGFDTFPTLLCADGCSMIDRRMGIYGYPIEIQALFFMALRSALPMVKLDTEGKELVERILKRMHALTFHMRNYFWLDFHQLNNIYRFKTEEYSHTAVNKFNVMPDSIPDWVFDFMPTKGGYFVGNVSPARMDFRWFALGNCVAILSSLAT…
>HcINV22
MEITSRVSWVLLFTLCSLSSLGKVKASHVLYKYDHRHSVPAIVVDNKYRTGYHFQPPKNWINDPNGPMYFNGIYHLFYQYNPHGAIWGNIVWAHSVSKDMINWKALKPAIYPSIPSDINGCWSGSATILPGNKPAILYTGIDSEHRQLQNIAYPKNLSDPYLVEWVKPDYNPIIEPVDGINATEFRDPTTAWLGPDNMWRLVVGSIRKHQNRGMAILYRSKDFVHWTRAKHPLHSSKGTGMWECPDFYPVSTKGKIGVDTSMHGNGLKYVLKVSLDLTRFEYYTIGSYRHDLDKYIPDATTPDNKSGLRYDYGNFYASKTFFDAGKNRRILWGWSNESDSQNDDIAKGWAGVQTIPRAVWFDSNGKQLIQWPIEELEALRGKGVQIENRNLVRGGVVEI…
>HcINV23
METVIISLIEACLILIISDIQGFLPKSPRSDHSERESQSGEMLKVDSNSSINESDEIQLTRLQRVKSRTNLERQRSFDERSMSELSISGHLRTVDSYESLYSPNSGVNRSVLDTPGSSTVRGSMFEPHPMVGEAWEALRRSIVNFRGQPVGTVAAYDHQSEEVLNYDQFPKYDGPSHPTTLPHETIFFIIAGVYGYPIEIQALFFMALRSALSMLKHDTQGKEFIERISTRLNALGYHMRSYFWLDFQQLNDIYRYKTEEYSHTAVNKFNVIPDSIPDWLFDFMPTHGGYFVGNVSPARMDFRWFALGNCIAILSSLATPEQSAAIMDLIEARWEELVGEMPLKIAYPAIESHEWRIVTGCDPKNTRWSYHNGGSWPVLLWLLTAACIKTGRPQIARRA…
>HcINV24
MALRCALAMLKHDAEGKEFIERIVKRLHALSCHMRSYFWLDFQQLNDIYRYKTEEYSHTAVNKFNVIPESIPDWVFDFMPTRGGYFIGNVSPAKMDSRWFALGNCIAILSSLANPEQSAAIMDLIEARWEELVGEMPLKIAYPALEGHEWRIVTGCDPKNTRWSYHNGGSWPVLLWLLTAACIKTGRPQIARQAMELAESRLLKDCWPEYYDARLLHQQTSQKFSDMVHCWLFGSQDVAGRPFSSRYDLIGRGQGYETCD*
>HcINV25
MTSSDLESNPLPYSPLPSSDQTGSGPEPETTSPRSVRVLFLAISCAFLLALGAFLYDAGSGVDPNPMPAPDLIVWGSERGVEEGVSSKSSGAPFLRSGSAAGDGWGPYPWTNKMLSWQRTGFHFQPEKNWMNGVKSPMYYKGWYHLFYQYNPDSALWGNITWGHAVSKDLLHWTHLPLAMVPDQWYDINGVWTGSATILPDGSIVMLYTGSTNESVQVQNLAVPADPSDPLLLKWKKAEANPVLVPPPGIGSRDFRDPTTAWLDSSDNTWRTVIGSKDSDHNGIALMYSTSDFISYSLLPGILHAVERVGMWECVDFYPVSTSGPTANQGLDPSVMPSNKVKHVLKASMDDDRHDYYALGTYDPSANTWTPDDESVDVGIGLRYDWGKFYASKTFYDQV…
>HcINV26
MDSHDLESPPLSSPLLPSEPESEPLKPRRTLRYFCFALSSALLLTFGVLAFVYYSGSVITGPDPVLLKPDPIVSTDRGVAAGVSRKSSAPPNLKSGSGLGGGSYPWTNAMLSWQRTGFHFQPENNWMNDSKEMSLTEVVTAGPMYYKGLYHFFYQYNPVSAVWGNISWGHAVSKDLLHWTHLPVAMVPDQWYDEGGVWTGSATILPDGRVVMLYTGGTNETVQVQNLAVPTDPSDPLLLRWVKSDANPVLFPPSHIDTHDFRDPSTAWFEPSDSTWRIVIGSKDSSHNGIAFVYSTKDFISYTLLPGVLHTVQKVGMWECVDLYPIASSGSLSRNGLDPSARPSSEVKHVLKASTEDNGSDYYAIGTYDPIANTWIPDNEAADVGIGWRYDWGNFYASK…
>HcINV27
MALAALRFSRRLSRLFPKCPSPRPPNPRGSRVISALRHFSTAVDPSPTPSFNHLFPHGSPVNTVTIEKVESEKQEGEEESGKTVNLEKAVKKSELEEEAWRLLRKAVVNYGGNPIGTVAADDATAANEKLNYDQVFIRDFVPSAIAFLLKGEGDIVRNFLLHTLQLQVIINNNKKLISWEKTVDCYSPGQGLMPASFKVRTVPLDGSNEAFEEILDPDFGESAIGRVAPVDSGLWWIILLRAYGKITKDLALQERVDVQTGIRLILNLCLSDGFDMFPSLLVTDGSCMIDRRMGIHGHPLEIQALFYSALRCGREMITINDGSKNLVRAINNRLSALSFHIREYYWVDMKKINEIYRYKTEEYSHDAINKFNIYPDQIPSWLVDWIPEKGGYLIGNLQP…
>HcINV28
METLLGLRKVSSHVSIADMEELDFEVMKLPKLNERQRSFDERSLSELTVNIRGSGDGYENVYSPRSGGHRSGFDTPASSVRNAFEPHPMVGEAWDALRRSMVYFRREPVGTIAAVDHASEEVLNYDQGDINGSCADDGVMRMTFPNMYSTDLEFFPSNILYHSATGIYGYPIEIQALFFMALRSALPMLKLDTEGKELVERILKRMHALTFHMRNYFWLDFQQLNNIYRFKTEEYSHTAVNKFNVMPDSIPDWVFDFMPTKGGYFVGNVSPARMDFRWFALGNCVAILSSLATPEQSMAIMDLIEARWEELVGEMPLKISYPAIESHEWRIVTGCDPKNTRWSYHNGGSWPVLLWLLAAACIKTGRPQIARRAIELTESRLLKDSWPEYYDGKLGRYVG…
>HcINV29
YSFQLSLSLSNLPSLSSIFLTMEITTRVTWALVFSVCSLINGMVEASHVPYVYERDSVPAIVVNNKYRTGYHFQPPKNWINDPNGPMYFNGIYHLFYQYNPNGAIWGNIVWAHSVSTDMINWKSLEPAIYASIPSDINGCWSGSATILPGNKPAILYTGIDSENRQLQNIAYPKNLSDPYLAEWVKPDYNPIIEPVDGINATQFRDPTTAWLGPDNKWRLVVGSIRKHQNRGMAILYRSKDFVHWTRAKHPLHSSKGTGMWECPDFYPVSTKEKLGVDTSVHGNGLKYVLKVSLDLTRFEYYTIGSYRHDLDKYIPDGATPDDKSGLRYDYGNFYASKTFFDAGKSRRILWGWSNESDSQNDDIAKGWAGVQTIPRAVWLDSNGKQLIQWPIEELEALR…
>HcINV30
MEITSRVSWVLLFTLCSLSSLGKVKASHVLYKYDHRDSVPAIVVDNKYRTGYHFQPPKNWINDPNGPMYFNGIYHLFYQYNPRGAIWGNIVWAHSVSKDMINWKALKPAIYPSIPSDINGCWSGSATILPGNKPAILYTGIDSEHRQLQNIAYPKNLSDPYLVEWVKPDYNPIIEPVDGINATEFRDPTTAWLGPDNMWRLVVGSIRKHQNRGMAILYRSKDFVHWTRAKHPLHSSKGTGMWECPDFYPVSTKGKIGVDTSMHGNGLKYVLKVSLDLTRFEYYTIGSYRHDLDKYIPDAATPDNKSGLRYDYGNFYASKTFFDAGKNRRILWGWSNESDSQNDDIAKGWAGVQTIPRAVWFDSNGKQLIQWPIEELEALRAKGVQIKNRNLVRGGVVEI…
>HcINV31
MVNSQLLNSGWILVVLLFWPSVFDGRNCVEAARRNFEVLDSPGSNPIASVQYRTAYHFQPRQNWINDPNGPLYYNGIYHLFYQYNPYAAVWGNISWGHSVSTDLIHWTGVELALAPTESYDINGCWTGSATILPGNKPVIVYTGGDTLNRQVQNIAFPKNLSDPYLREWFKPSYNPLIQPVNGLNANEFRDPTTGWRGRDGLWRMGVGAAIAEKGQVLLYRSKDYVNWVRAKDPLHSTNGTGMWECPDFYSLKEGRGSGEKKYVLKMSLGATQSDHYMLGKYDEEKDVFLRDNPSDDYRLWKRYDYGNFYASKTFFDEKKQRRILWGWSNESDSTSDDLAKGWAGIQTFPRVVSLDPSGQLVQWPIKELESLRMKKTYTVHDIELKTGGVVEIKGLQAS…
>HcINV32
MDITTRVVWALVFSVVFGVCSLINGMVEASHVPYVYERDSVPAIVVNNKYRTGYHFQPPKNWINGPMYFNGIYHLFYQYNPKGAIWGNIVWAHSVSTDMINWKSLEPAIYASIPSDINGCWSGSATILPGNKPAILYTGIDSENRQLQNIAYPKNLSDPYLAEWVKPDYNPIIEPVDGINATQFRDPTTAWLGPDNKWRLVVGSIRKHQNRGMAILYRSKDFVHWTRAKHPLHSSKGTGMWECPDFYPVSTKEKLGVDTSVHGNGLKYVLKVSLDLTRFEYYTIGSYRHDLDKYIPDGATPDDKSGLRYDYGNFYASKTFFDAGKSRRILWGWSNESDSQNDDIAKGWAGVQTIPRAVWLDSNGKQLIQWPIEELEALRGKSDVEVIFELSDLSKAEAF…
>HcINV33
MIYRVMSRGVSNGVSEKSTAATLLLLSSEDGSYPWTNAMLAWQRTAFHFQPPKNWMNGNLTPLYYKGWYHLFYQYNPDSAIWGNITWGHAISRDLIHWRYLPLAMVPDHWYDRNGVWTGSATILTDNQIVIVYTGSTNETVQVQNLARPGDPSDPLLHDWVKSDSNPVLLPPAGIGDQDFRDPTSAWFVKSESAWRIAIGSRNSKHDGIAFVYQTKDFVNYKLLPGLLHEVAGTGMWECLDFYPVSTTLAEGLDTSAEPGEGVKHVLKASLDDDKHDYYAIGEYDVAKNVWVPDDPENDVGIGLRVDYGKYYASKTFYDEVKERRVLWGWIGETDSEMNDLLKGWASVQTIPRTVLFDKKTGSNLLQWPVKEVESLRLSKKKFKNLNLATGSVLPLNIG…
>HcINV34
MESNGRTSTWNEVEDDLELPRVHVRQRSFDERSLSELTISHLKVGDGYESIYSPGVGTRSVWDTPGWGRGPFEPHPMVGEAWEALRRSLVYFRGQPLGTLAAIDHASEEVLNYDQVFVRDFVPSGLAFLMNGEHDIVKNFLLKTVHLQGWEKRVDRFKLGEGVMPASFKVLHDPVRKTDTVVADFGESAIGRVAPVDSGFWWIILLRAYTKSTGDLSLAETPECQKGMRLVLALCLSEGFDTFPTLLCADGCSMIDRRMGVYGYPIEIQALFFMALRCALAMLKHDAEGKEIIERIVKRLHALSYHMRSYFWLDFQQLNDIYRYKTEEYSHTAVNKFNVIPESIPDWVFDFMPTRGGYFIGNVSPAKMDFRWFALGNCIAILSSLATPEQSAAIMDLIE…
>HcINV35
METLLGLRKVSSHVSIADMEELDFEVMKLPKLNERQRSFDERSLSELTVNIRGSGDGYENVYSPRSGGHRSGFDTPASSVRNAFEPHPMVGEAWDALRRSMVYFRREPVGTIAAVDHASEEVLNYDQGDINGSCADDGVMRMIFPNMYSTDLEFFPSNILYHSATGIYGYPIEIQALFFMALRSALPMLKLDTEGKELVERILKRMHALTFHMRNYFWLDFQQLNNIYRFKTEEYSHTAVNKFNVMPDSIPDWVFDFMPTKGGYFVGNVSPARMDFRWFALGNCVAILSSLATPEQSMAIMDLIEARWEELVGEMPLKISYPAIESHEWRIVTGCDPKNTRWSYHNGGSWPVLLWLLTAACIKTGRPQIARRAIELTESRLLKDSWPEYYDGKLGRYVG…
>AT4G34860.1
MSSFNLSVDVNQNGNIKNVDSLSTLDDIDDIDFAKLLEKPRPLNIDRLRSLDERSLTELTGSPQLRNADNASRAPDHADYVISPSFGRRSGFNTPRSQPGFESHPMVGEAWDALRRSMVYFRGQPVGTIAAVDNSEEKLNYDQVFVRDFVPSALAFLMNGEPDIVKNFLLKTLRLQSWEKKIDRFQLGEGVMPASFKVFHDPVRNHETLIADFGESAIGRVAPVDSGFWWIILLRAYTKSTGDSSLADMPECQKGIRLILSLCLSEGFDTFPTLLCADGCCMIDRRMGVYGYPIEIQALFFMALRCALLLLKHDGEGKEMVEQIVKRLHALSYHMRSYFWLDLKQLNDIYRYKTEEYSHTAVNKFNVIPDSLPEWVFDFMPPHGGFFIGNVSPARMDFR…
>AT1G72000.1
MSLSLYDSAHSLDGKSGWDTPVFSMKDSMDRNPMVTEAWEALCQSQVYFRGKPVGTIAAYDHASEEVLNYDQVFVRDFVPSALAFLMNGEPEIVKNFLLKTLHIQGQDKMIDKFKLGDGAMPASFKVLHNPIKKTDTIIADFGESAIGRVAPVDSGFWWIILLRAYTKSTGDHSLAERPECQKGMRLILSLCLSEGFDTFPTLLCADGCSMVDRRMGIYGYPIEIQALFFMALRSALSMLKHDSEGKEFMEKIVKRLHALSFHMRSYFWLDFQQLNDIYRYKTEEYSHTAVNKFNVIPDSIPDWIFDFMPLRGGYFVGNVSPARMDFRWFALGNCIAILSSLATPEQSMAIMDLIEARWEELVGEMPLKICYPAMESHEWGIVTGCDPKNTRWSYHNGG…
>AT1G22650.1
MEGVNSSSSISDLDELARLLDRPRVNIERKRSFDERSFSEMGIFDNVNSPGGWETPVSSARNSFEPHPMVAEAWDALRRSLVYFRGQPVGTIAAYDHATEEVLNYDQVFVRDFVPSALAFLMNGEPDIVKNFLLKTIQIQGREKRIDRFKLGEGAMPASFKVIHDPIKETDSINADFGESAIGRVAPVDSGFWWIILLRAYTKSTGDTSLAETSECQKGMRLILSLCLSEGFDTFPTLLCADGCSMIDRRMGVYGYPIEIQALFFMALRSAMSMLKHDAEGKEFMERIVKRLHALSFHMRSYFWLDFQQLNDIYRYKTEEYSHTAVNKFNVIPDSIPEWVFDFMPLRGGYFIGNVSPARMDFRWFALGNCVAILASLATPEQSASIMDLIEERWEELVG…
>AT3G06500.1
MNSRSCICVSAMKPCCRFLISFRSSSLFGFSPPNSGKFINSSKLHCTKIDSRSIRSGIHCRRIVLDRNAFCDSDSISWGGGGSRVLRARGSSRGRGRGVLVIPHVASDFRNYSTSSLDSHVNDKSFESMFVKPLVFKEVEKTEGIPKRERGNVGGGKDANFGNVGVRKETERCLSQTEVEKEAWKLLRGAVVNYCGFPVGTVAANDPGDTQTLNYDQVFIRDFVPSAYAFMLDGEGEIVRNFLLHTLQLQSWEKTVDCHSPGPGLMPASFKVKSAPLEGNDGSFEEFLDPDFGGSAIGRVSPVDSGLWWIILLRAYGKLTGDYTLQERIDVQTGIKLILKLCLADGFDMFPTLLVTDGSCMVDRRMGIHGHPLEIQALFYSALRCAREMLIVNDGTKSL…
>AT1G56560.1
MSAIYLLRKISTKTPSRFHRSLFFSTFSKDSPPDLSRTTSIRHLSSSQRFVSSSIYCFPQSKILPNRFSEKTTGISVRQFSTSVETNLSDKSFERIHVQSDAILERIHKNEEEVETVSIGSEKVVREESEAEKEAWRILENAVVRYCGSPVGTVAANDPGDKMPLNYDQVFIRDFVPSALAFLLKGEGDIVRNFLLHTLQLQSWEKTVDCYSPGQGLMPASFKVRTVALDENTTEEVLDPDFGESAIGRVAPVDSGLWWIILLRAYGKITGDFSLQERIDVQTGIKLIMNLCLADGFDMFPTLLVTDGSCMIDRRMGIHGHPLEIQSLFYSALRCSREMLSVNDSSKDLVRAINNRLSALSFHIREYYWVDIKKINEIYRYKTEEYSTDATNKFNIYPE…
>AT5G22510.1
MAASETVLRVPLGSVSQSCYLASFFVNSTPNLSFKPVSRNRKTVRCTNSHEVSSVPKHSFHSSNSVLKGKKFVSTICKCQKHDVEESIRSTLLPSDGLSSELKSDLDEMPLPVNGSVSSNGNAQSVGTKSIEDEAWDLLRQSVVFYCGSPIGTIAANDPNSTSVLNYDQVFIRDFIPSGIAFLLKGEYDIVRNFILYTLQLQSWEKTMDCHSPGQGLMPCSFKVKTVPLDGDDSMTEEVLDPDFGEAAIGRVAPVDSGLWWIILLRAYGKCTGDLSVQERVDVQTGIKMILKLCLADGFDMFPTLLVTDGSCMIDRRMGIHGHPLEIQALFYSALVCAREMLTPEDGSADLIRALNNRLVALNFHIREYYWLDLKKINEIYRYQTEEYSYDAVNKFNIY…
>AT1G35580.1
MEGVGLRAVGSHCSLSEMDDLDLTRALDKPRLKIERKRSFDERSMSELSTGYSRHDGIHDSPRGRSVLDTPLSSARNSFEPHPMMAEAWEALRRSMVFFRGQPVGTLAAVDNTTDEVLNYDQVFVRDFVPSALAFLMNGEPDIVKHFLLKTLQLQGWEKRVDRFKLGEGVMPASFKVLHDPIRETDNIVADFGESAIGRVAPVDSGFWWIILLRAYTKSTGDLTLSETPECQKGMKLILSLCLAEGFDTFPTLLCADGCSMIDRRMGVYGYPIEIQALFFMALRSALSMLKPDGDGREVIERIVKRLHALSFHMRNYFWLDHQNLNDIYRFKTEEYSHTAVNKFNVMPDSIPEWVFDFMPLRGGYFVGNVGPAHMDFRWFALGNCVSILSSLATPDQSM…
>AT4G09510.1
MEEGHKEPLVLRVEGSHCSLSEMDDFDLTRALEKPRQLKIERKRSFDERSMSELSTGYVRQDSILEMAHSPGSRSMVDTPLSVRNSFEPHPMVAEAWEALRRSMVFFRGQPVGTIAAYDHASEEVLNYDQVFVRDFVPSALAFLMNGEPDIVKNFLLKTLQLQGWEKRVDRFKLGEGVMPASFKVLHDPVRKTDTIIADFGESAIGRVAPVDSGFWWIILLRAYTKSTGDLTLSETPECQRGMRLILSLCLSEGFDTFPTLLCADGCSMVDRRMGVYGYPIEIQALFFMALRCALSMLKPDEEGRDFIERIVKRLHALSFHMRSYFWLDFQQLNDIYRYKTEEYSHTAVNKFNVMPDSIPDWVFDFMPLRGGYFVGNVSPARMDFRWFSLGNCVSILSS…
>AT3G05820.1
MLDAIKLAINNEHKKAFCNLRSWTLIMNAITFLGNSTMIPSQCILRAFTRISPSKYIRDTSFRSYPSRFSSCINQYRNADSDRIIRPTNAVPFCTDRQSSVTAQVVSEARSHSASTTCANDTTLDQIYTKNGLNVKPLVVERLKRDEKDEEAVNEDEEGVKRDGFEGVKCNDVEEEAWRLLRDSIVTYCDSPVGTVAAKDPTDTTPSNYDQVFIRDFVPSALAFLLKGESEIVRNFLLHTLQLQSWEKTVDCYSPGQGLMPASFKVRTLPLEEDKFEEVLDPDFGEAAIGRVAPVDSGLWWIILLRAYGKITGDYSLQERIDVQTGIKMIANLCLADGFDMFPTLLVTDGSCMIDRRMGIHGHPLEIQALFYSALRSSREMITVNDSSKNIIKTISNRL…
>AT5G11920.1
MADVMEQNLLQTAVLNRTSFHFQPQRNWLNDPNAPMYYKGFYHLFYQNNPLAPEFSRTRIIWGHSVSQDMVNWIQLEPALVPSESFDINSCWSGSATILPDGRPVILYTGLDVNNKQQVTVVAEPKDVSDPLLREWVKPKYNPVMVPPSNVPFNCFRDPTEAWKGQDGKWRVLIGAKEKDTEKGMAILYRSDDFVQWTKYPVPLLESEGTGMWECPDFFPVSITGKEGVDTSVNNASVRHVLKASFGGNDCYVIGKYSSETEDFSADYEFTNTSADLRYDHGTFYASKAFFDSVKNRRINWGWVIETDSKEDDFKKGWAGLMTLPREIWMDTSGKKLMQWPIEEINNLRTKSVSLDDCYEFKTGSTFEISGITAAQADVEVTFNLPFLENNPEILDADQ…
>AT1G12240.1
MASSDALLPISAREEEPLCPYTRLPMADPNQETHGPRRRRPFKGLLAVSFGLLFIAFYVALIATHDGSRSNDEGIDETETITSRARLAGVSEKRNDGLWKLSGDRNTPAFEWNNSMLSWQRTAFHFQPEQNWMNDPNGPLFYKGWYHFFYQYNPNAAVWGDIVWGHAVSRDLIHWVHLPIAMVADQWYDSNGVWTGSATFLPDGSIVMLYTGSTDKAVQVQNLAYPEDPNDPLLLKWVKFPGNPVLVPPPGILPKDFRDPTTAWKTSEGKWRITIGSKLNKTGISLVYDTIDFKTYEKLDTLLHRVPNTGMWECVDFYPVSKTAGNGLDTSVNGPDVKHIVKASMDDTRFDHYAVGTYFDSNGTWIPDDPTIDVGMTASLRYDYGKFYASKSFYDQNKG…
>AT1G62660.1
MASTEALLPVTSLQDPLSESRSDQIPETRRRRPIKVHLAVYSGLLLIALYVTLIVTHDGSKAEIATESRPRMAGVSEKSNDGVWISSDDGKVEAFPWNNTILSWQRTAFHFQPEKNWMNDPNGPLFYKGWYHFFYQYNPNAAVWGDIVWGHAVSKDLIHWLYLPIAMVPDQWYDANGVWTGSATFLDDGSIVMLYTGSTDEFVQVQNLAYPEDPSDPLLLKWVKFSGNPVLVPPPGIGAKDFRDPTTAWKTSSGKWRITIGSKINRTGISLIYDTTDFKTYEKHETLLHQVPNTGMWECVDFYPVSKTQLNGLDTSVNGPDVKHVIKASMDDTRIDHYAIGTYDDSNATWVPDNPSIDVGISTGLRYDYGKYYASKTFYDQNKGRRILWGWIGESDSEA…
>AT3G13790.1
MTKEVCSNIGLWLLLTLLIGNYVVNLEASHHVYKRLTQSTNTKSPSVNQPYRTGFHFQPPKNWMNDPNGPMIYKGIYHLFYQWNPKGAVWGNIVWAHSTSTDLINWDPHPPAIFPSAPFDINGCWSGSATILPNGKPVILYTGIDPKNQQVQNIAEPKNLSDPYLREWKKSPLNPLMAPDAVNGINASSFRDPTTAWLGQDKKWRVIIGSKIHRRGLAITYTSKDFLKWEKSPEPLHYDDGSGMWECPDFFPVTRFGSNGVETSSFGEPNEILKHVLKISLDDTKHDYYTIGTYDRVKDKFVPDNGFKMDGTAPRYDYGKYYASKTFFDSAKNRRILWGWTNESSSVEDDVEKGWSGIQTIPRKIWLDRSGKQLIQWPVREVERLRTKQVKNLRNKVLK…
>AT1G55120.1
MAKLNRSNIGLSLLLSMFLANFITDLEASSHQDLNQPYRTGYHFQPLKNWMNDPNGPMIYKGIYHLFYQYNPYGAVWDVRIVWGHSTSVDLVNWISQPPAFNPSQPSDINGCWSGSVTILPNGKPVILYTGIDQNKGQVQNVAVPVNISDPYLREWSKPPQNPLMTTNAVNGINPDRFRDPTTAWLGRDGEWRVIVGSSTDDRRGLAILYKSRDFFNWTQSMKPLHYEDLTGMWECPDFFPVSITGSDGVETSSVGENGIKHVLKVSLIETLHDYYTIGSYDREKDVYVPDLGFVQNESAPRLDYGKYYASKTFYDDVKKRRILWGWVNESSPAKDDIEKGWSGLQSFPRKIWLDESGKELLQWPIEEIETLRGQQVNWQKKVLKAGSTLQVHGVTAAQ…
>AT3G52600.1
MSAPKFGYVLLLIVLINISNNGVDAFHKVFKKLQSKSTSLESVSPLHRTAYHFQPPRHWINDPNAPMLYKGVYHLFYQYNPKGAVWGNIVWAHSVSKDLINWEALEPAIYPSKWFDINGTWSGSATHVPGKGPVILYTGITENQTQIQNYAIPQDLSDPYLKTWIKPDDNPIVKPDNGENGSAFRDPTTAWFNKKDGYWRMLVGSKRKNRGIAYMYKSRDFKKWVKSKRPIHSRKKTGMWECPDFFPVSVTDKKNGLDFSYDGPNAKHVLKVSLDLTRYEYYTLGTYDTKKDRYRPDGYTPDGWDGLRFDYGNYYASKTFFDDKTNRRILWGWANESDTVQDDTVKGWAGIQLIPRTILLDSSGKQLVFWPIEEIESLRGKNVQMTNQKMEMGQRFEVQ…
>AT2G36190.1
MAISNVISVLLLLLVLINLSNQNIKGIDAFHQIYEELQSESVESVNHLHRPSFHFQPPKHWINDPNGPVYYKGLYHLFYQYNTKGAVWGNIIWAHSVSKDLVNWEALEPALSPSKWFDIGGTWSGSITIVPGKGPIILYTGVNQNETQLQNYAIPEDPSDPYLRKWIKPDDNPIAIPDYTMNGSAFRDPTTAWFSKDGHWRTVVGSKRKRRGIAYIYRSRDFKHWVKAKHPVHSKQSTGMWECPDFFPVSLTDFRNGLDLDYVGPNTKHVLKVSLDITRYEYYTLGKYDLKKDRYIPDGNTPDGWEGLRFDYGNFYASKTFFDYKKNRRILWGWANESDTVEDDILKGWAGLQVIPRTVLLDSSKKQLVFWPVEEIESLRGNYVRMNNHDIKMGQRIEV…
>AT3G13784.1
MANIVWCNIAMFLLVSLFLTDDAVVVLDALDNVPNNIKNQPYRTGYHFQPPKNWMNGPMIYKGIYHLFYQWNQNGAVMDVNKTVWGHATSTDLINWITLSPAIRPSRPSDINGCWSGSVTILPNGKPVILYTGNDRYNRQVQNLVKPKNLTDPYLRHWTKSPENPLVTPSPVNHINSSAFRDPTTAWFGRDGRWRITTGSQEGRRGLAILHTSKDFVIWKQSPKPLHYHDGTGMWECPDFFPVARTDSRGLDTSFSSGPMVKHVLKVSLTDTFNDYYTIGTYDEVRDVYVPDKGFVQDETAPRYDYGKFYASKTFYDSVNQRRILWGWVNESSPEKDNIKKGWAGLQAIPRKVWLDESGKRLVQWPVKEIERLRTTQVKWGNKLLKGGSVMEVHGVTAP…
>Si000681m.g
MNGQTPMGLAAAAAAAVRPCSRRLLSSASTATSKTAAGTATPLFPRLPHPHHPPCGRRLPFLVSAASQSQASQTGPDAPPTHIPSDPRAAVSGNLPFFDRVLFPDSFPLETPAAKEDEDAAAAHADEAVAPAPPVREETETEREAWRLLRRAVVSYCGEPVGTVAAEDPECTETLNYDQVFIRDFVPSALAFLMRGETEIVRNFLLHTLQLQSWEKTVDCYSPGQGLMPASFKIRTVPLDENNEGFEEVLDPDFGEAAIGRVAPVDSGLWWIILLRAYCKITGDNDLLERVDVQTGIQLILSLCLSDGFDMFPTLLVTDGSCMIDRRMGIHGHPLEIQALFYSALRCSREMLVVNDGSKNLIRAVNNRLSALSFHIREYYWVDMKKINEIYRYKTEEYS…
>Si009683m.g
MDMGIARVAAPPHLACSARPTGGSLGVGAARPGTGTQSGRGRSRCRPPRPPNSVPDPRARHPDHPALETGDADGRSVNGGAKPHAQAAPRGRRAAADVEDEGWELLRESVVRYCGSPVGTIAACDPDDPTPLNYDQVFIRDFVPSGVAFLLKGEHDIVRNFILHTLQLQSWEKTMDCHSPGQGLMPASFKVRVIPLDGEDDAIEEVLDPDFGEAAIGRVAPVDSGLWWIILLRAYGKCSGDLSVQERIDVQTGIKMIVKLCLADGFDMFPTLLVTDGSCMIDRRMGIHGHPLEIQALFYSALLCAREMLTPEDGSDDLIRAMNNRLIALSFHIREYYWLDKRKLNEIYRYKTEEYSYDAVNKFNIYPDQIPSWLVQWIPPKGGYFIGNLQPAHMDFRFF…
>Si009717m.g
MDAAAAMRKASSQASLADPDDFDLTRLLNHKPRINVERQRSFDDRSLSELSLSGAGSRGGWGYGGGMMESYESMYSPGGGLRSYCGTPASSTRLSFEPHPLVGEAWDALRRSLVSFRGQPLGTIAAVDHSTDEVLNYDQVFVRDFVPSALAFLMNGEPEVVRNFLLKTLLLQGWEKRIDRFKLGEGAMPASFKVLKDPKRGVDKLVADFGESAIGRVAPVDSGFWWIIILRAYTKSTGDMTLAETPMCQKGIRLIMNQCLAEGFDTFPTLLCADGCCMIDRRMGVYGYPIEIQALFFMALRCALLMLKPDAEGKEIMERIVTRLAALSYHVRGYFWLDFQQLNDIYRFKTEEYSHTAVNKFNVNPESIPDWLLDFMPTRGGYFVGNVSPARMDFRWFAL…
>Si016691m.g
MGIAEAALHTMPGAFAAHSPASNLSIGADARRRKRTTNLVPNARALQGLLKIPRLRSVRRQCQRIDDLAKVTEGNGTWATDAMNNASQVLGDLSARDQAVGGNGGLNGNAVKSPPKMWKTSSVEDEAWELLQESMVYYCGSPVGTIAANDPNDSDPVNYDQVFIRDFIPSGIAFLLKGEYEIVRNFILHTLQLQSWEKTMDCHSPGQGLMPASFKVRTIPLDGDEDVTEEVLDPDFGEAAIGRVAPVDSGLWWIILLRAYGKCSGDLSVQERIDVQTGMKMILKLCLADGFDMFPTLLVTDGSCMIDRRMGIHGHPLEIQALFYSALLCAREMLTPEDGSADLIRALNNRLIALSFHIREYYWVDMQKLNEIYRYKTEEYSYDAVNKFNIYPDQIPPWL…
>Si016786m.g
MVVCAEPPPKLKIPESKITELTDDANHESSKPERRTRMHHIERHRSCVVTLSDMELNDLQPRRLLQTLEVSKSPGGGSQCSLHEETPTDANASHRHAIADAAWEALKRSIVYFRGQPIGTVAAIDKSQGAALNYDQVFMRDFIPSALAFLMKGEHLIVKNFLVETARLQSREKMVDLFKLGQGVMPASFKVHHRNPTLKTETLLADFGETAIGRVAPVDSGLWWIILLRAYTRWTGDNSLAESPNCQRAMHLILRLCLSEGCDTSPALLCADGCSMIDRRMGIYGYPIEIQALFFMAMRCALSMLKQDSDADFVNHITKRIQALSYHLHSYYWLDFQRLNDIYRYKTEEYSQTALNKFNVIPESIPDWIFDFMPSRGGYFIGNVSPARMDFRWFCLGNF…
>Si016798m.g
MELAVGGGMRRSASHTSLSESDDFELTRLLSKPRINVERQRSFDDRSLSDVSHSGGYGRGGAFDGMYSPGGGLRSLVGTPASSALHSFEPHPIVGDAWEALRRSLVFFRGQPLGTVAAVDHASEEVLNYDQVFVRDFVPSALAFLMNGEPDIVKNFLLKTLLLQGWEKKVDRFKLGEGAMPASFKVMHDAKKGVETLHADFGESAIGRVAPVDSGFWWIILLRAYTKTTGDLTLAETPECQKGMRLILSLCLSEGFDTFPTLLCADGCCMIDRRMGVYGYPIEIQALFFMALRCALQMLKHDNEGKEFVEKIATRLHALSYHMRSYFWLDFQQLNDIYRYKTEEYSHTAVNKFNVIPDSIPDWLFDFMPCQGGFFVGNVSPARMDFRWFALGNMIAILS…
>Si026182m.g
MKRVSSHVSMASEAEINLDLSRLIIDKPRFTLERKRSFDEQSWSELSHRQNDGFDSVLQSPAFPSGGFDSPFSMGTHFGGGPHPLVNEAWEALRKSVVYFRGQPVGTIAATDHASEEVLNYDQVFVRDFVPSALAFLMNNETDIVKNFLLKTLHLQSSEKMVDRFKLGAGAMPASFKVDRNKNRNTETLVADFGESAIGRVAPVDSGFWWIILLRAYTKYTGDVSLSESPDCQKCMRLILNLCLSEGFDTFPTLLCTDGCSMIDRRMGIYGYPIEIQALFYMALRCALQMLKPEGEGKEFIEKIGQRLHALTYHMRNYFWLDFHQLNNIYRYKTEEYSHTAVNKFNVIPDSIPDWVFDFMPCRGGYFLGNVSPAMMDFRWFALGNCIAIVSSLATPEQS…
>Si034714m.g
MAAAAISHLRRGAQRHALLCLSLPRRRFSSTAASPLAAAARRLLSTTVDAGASSSGEHYKPPPFEPFRAATLTPSAPPLESPPIEDEPPSSPPPPEEAAASEAAHEQATLACQEVELEGLKAGVEAVKSREESPEEKEAWWLLGRAVVNYCGSAVGTVAANDPSTSQMLNYDQVFIRDFVPSAIAFLLKGESDIVKNFLLHTLQLQSWEKTVDCYSPGQGLMPASFKVRSVPLDGNSEAFEEILDPDFGESAIGRVAPVDSGLWWIILLRAYGKITGDYALQERVDVQTGIRLILNLCLSDGFDMFPTLLVTDGSCMIDRRMGIHGHPLEIQALFYSALRCAREMISVNDGSKNLIRAINNRLSALSFHIREYYWVDMKKINEIYRYKTEEYSHDAINK…
>Si000803m.g
MALVLRPWAFLLFLVLVSYDESGLQSRRNGVAQATQRVFLYPQSPKVSSIVSTKYRTAYHFQPPKNWINGPMYYNGIYHQFYQYNPNGSLWGNIVWGHSVSTDLINWIRLEPAIERTIPSDINGCWTGSATILKGNRPAIIYTGADTEKRQVQNIVFPKNVSDPYLREWIKPDNNPLIQPIGQGLNSGQFRDPTTGWIGPDGLWRIAVGAELNGYSAALLYKSEDFVNWTRVDHSLYSSNASTMWECPDFFAVLPGNNSGLDLSAAIPNGAKHVLKMSLDNCDKYMVGVYDLKSDTFVPDTILDDRRLWSRIDYGNYYASKSFFDSKRGRRIIWGWTNETDSSLDDVAKGWAGIHAIPRTIWLDSNSKQLLQWPVEEVESLRSEEVSHQGLELKQGDLF…
>Si009543m.g
MIPPVADPAMLEGAARSPLLPATDPRRAAAPAGGAGQRRPSSSTVLPAVVSAVLLLVLAVVTILASQHVDNGQRVVMPPAGGDVAAAAGRVVEVAATRGVAEGVSEKSTAPLLGGAGALRDYSWTNAMLAWQRTAFHFQPPKNWMNDPNGPLYHKGWYHLFYQWNPHSAVWGNITWGHAVSRDLVHWLHLPLAMVPDHWYDANGVWSGSATRLPDGRIVMLYTGSTADSVQVQNLAEPADPSDPLLREWVKSDANPVLVPPPGIGLKDFRDPTTAWRVPNDTAWRVAIGSKDRSHAGLALVYRTEDFVRYDPDPALMHVVPGTGMWECVDFYPVATGSGGAGENSGLETSAPPGPGVKHVVKASLDDDKHDYYAIGTYDAAADTWTPDDTVNDVGIGLR…
>Si009687m.g
MRALGRVAWAWLLLLQLAGASHVVYENLLEVEEAAAAAVPPSIIDPLLRTGYHFQPRKNWINDPNAPLYYKGWYHLFYQYNPKGAVWGNIVWAHSVSRDLINWMALKPAIEPSIASDKYGCWSGSATMLPDGTPTIMYTGVNRPDVNYQVQNVAYPRNKSDPLLREWDKPSHNPIIVPKAGINATQFRDPTTAWRAGGHWRLLIGSVTGPAHGVAYVYRSRDFKRWTRVERPLHSAATGMWECPDFYPVEAAGRREGLDTSVSGRRARKYVLKNSLDLRRYDYYTVGTYDRRAERYVPDDPAGDERHLRYDYGNFYASKTFYDPAKRRRILWGWANESDTSADDVAKGWAGIQAIPRTVWLDPSGKQLLQWPIEEVEALRGKSVTVKDRVIKPGQHVEV…
>Si009691m.g
MGALVIRVACAWLLLLQLTGASHVVYNYKELETEAATANVPPSIVDPLLRTGYHFQPPKNWINDPNAPMYYNGWYHFFYQYNPKGAVWENIVWAHSVSRDLINWEALETAIEPSIPGDKYGCWSGSATTLPCGTPVIMYTGINRPDVSYQVQNIAFPKNKSDPMLREWVKPGHNPIIVPEADINATQFRDPTTAWLSGGQWRLLIGSAAEGGSRGVAYVYRSRDFRRWRRVERPLHSAATGMWECPDFYPVEAGYADGLEASASGPKVKYVLKNSLDLRRYDYYTVGTYDEKAERYVPDDAAGDEHHLRYDYGNFYASKTFYDPAKKRRVLWGWANESDTRTHDVAKGWAGIQAIPRKVWLDFSGKQVLQWPIEEVEALRHQPVTLKDKVIKPGKHVEV…
>Si009702m.g
MRALGRVVWAWLLLLQLAGASHVVYENLLEVEAAAVPPSIVDPELRTGYHFQPPKNWINAPMYYKGWYHFFYQYNPKGAVWGNIVWAHSVSRDLINWVALETAIEPSIPSDQYGCWSGSATILPDGTPVIMYTGIDRPNINYQVQNIAYPRNKSDPLLREWVKPAHNPIIVPEGGINATQFRDPTTAWRDDDDGRWRLLIGSVAAGGARGVAYVYRSRDFRRWARVRRPLHSAATGMWECPDFYPVERDGRRVGLETSVSGRRVKHVLKNSLDLRRYDYYTVGAYDRRAERYVPDDPAGDERRLRYDYGNFYASKTFYDPAKRRRILWGWANESDTAAADVAKGWAGIQAIPRTVWLDPSGKQLLQWPIEEVEALRGKSVTVKDRVIKPGQRVEVIGLQ…
>Si012687m.g
MGPAAVTALLLLALLTIVRASHVVYPELQSLEATQIDETSRTGYHFQPPKHWINGPMYYKGLYHLFYQYNPKGAVWGNIVWAHSVSTDLIDWTALDPGIYPSKPFDINGCWSGSATLLPSGVPVMMYTGIDPDEHQVQNVAYPKNLSDPFLREWVKPDYNPIISPDGGINASAFRDPTTAWYGPDRHWRLLVGSKVGDKGLAVLYRSRDFKRWVKAHHPLHSGLTGMWECPDFFPVAVHGGSRHHRRGVDTAELRDAAVAEEVKYVLKVSLDLTRYEYYTVGSYDHATDRYTPDAGFPDNDYGLRYDYGDFYASKSFYDPAKRRRILWGWANESDTVPDDRKKGWAGIQAIPRKLWLSPRGKQLIQWPVEEIKALRAKHVNVSDKVVKSDQYFEVTGFK…
>Si016754m.g
MGTPQRVLAPWAVLLLALQLAGASHVIHRSLEAEAAPPSVPASIVNSLLRTGYHFQPPMNWINDPNAPMYYKGWYHLFYQYNPKGAVWGNIVWAHSVSRDLINWIALEPAIYPSIPSDQYGCWSGSATLLGNGTPAITYTGISRSDINYQVQNIAFPKNASDPLLREWVKPPELNPIAVPEAGINATQFRDPTTAWFAGRHWRMLVGGVRGTRGLAFVYRSRDFMKWTRAKHPLHSAMTGMWECPDFFPVSGAGAENGLDTSEHGVKYVLKNSLDLTRYDYYTVGSYNRSNDQYVPDDPAGDYRRLRYDYGNFYASKTFYDPAKRRRVLLGWANESDSVPDDKAKGWAGIQAIPRKIWLDPSGKQLLQWPVEEVEKLRGKPVSVGGKVVKPGEHFEVTG…
>Si016887m.g
MAPCTTRGGTTCSTSTTRTARSGATRSLGATPCPATLSTGGTSPWPWFPTSGTTSTACGRGPPPPSPTAASPCSTPAPPTSRCRCSASPSPPTPPTRSSPTGPSTRATPCCSRRRPSAPRTSATRPPPGSTPPTAPGASSSAPRTPTTPASPSPTKPRISSTFDLLPGLLHRVEGTGMWECIDFYPVGTRGRGSENGIDMSDAISENGVVVGDVVHVMKASMDDDRHDYYALGRYDAAANAWTPLDAARDVGIGLRYDWGKFYASKTFYDPAKRRRVLWGWVGETDSERADVSKGWASLQSIPRTVLFDTKTGSNLLQWPVDEVETLRTNSTDLSGITIDYGSVFPLNLHRATQLDIVAEFEVDRHAVMALNEADVGYNCSTSGGAANRGALGPFGLLV…
>Si021569m.g
MAGLPLSAVAFYLCLLASSSSALRVAPATTSEGRHVRRTAYHFQPAKNWQNDPNGPMYYNGMYHFFYQYNPHGALWDIGNLSWGHSVSGDLVNWAALDTAIDPTAPFDINGCWSGSATILRGGTPAILYTGIDANKEQVQNLAFPKNPADPLLREWHKPSYNPVIPLPADVPGDKFRDPSTAWLGRDGLWRIAVSAEVSGVASTLVYRSADFVHWERNDAPLHSSRAAGMVECPDLFPVKAHGEEGGLDTSASGAGVSHVLKLSVMDTLQDYYMVGRYDDAADAFVPAEPERGDDVRNWRRFDYGHVYAAKSFFDARRNRRVLWAWANESDSQADDVARGWSGVQTVPRKLWLDKDGKQLRQWPIEEIETLRRKRVGLRRNTMLSAGAMNEIVGIAEAQ…
>Si021617m.g
MNGKQHLHQGRHGRTAYHFQPAKNWMNDPNGPFYHNGMYHFFYQYNPHGPTFGTGKLSWGHSVSGDLVNWAFLGTALDPTSPFDAKGCWSGSATTMPDGRLAILYTGLDADDVQVQNVAFAKNPSDLLLREWDKPSFNPIVPQPADITRNNFRDPTTAWLGHDGLWRFAVAAEVAGVGSTVIYRSADFITWERNAAPLHAAPGVPCWECPDFFPVVEHGTEGLDTSANGPGVRHVLKLSKAANEDYYVVGWYNDGADTFSPVEEGERGGDVRNWRRIDHGHLFGAKSFFDARKNRRVLWAWVDETDGSSYDGAKGWTGIQSFPRALWLDTEGKQLVQWPVEEIETLRRKRVALLGKEVGSGELHEIAGIETLQADVQVVFEIPNLEDAEQLDPKWLQDP…
>Si025212m.g
MAAIPGSLAGPFYHNGIYHFFYQYNPHGPTFGTGKLSWGHSVSGDLVNWAFLGAALEPTSPFDADGCWSGSATVLPDGRPVILYTGRDTDTVQVQNVAFPKDPTDPLLREWHKPSCNPVIPQPADVTGNNFRDPSTAWLGGDGLWRFSVAAEVAGVGSTLVYRSADFLRWERNATPLHASPDVPALECADFFPVAERGTEGLDTSAANVAGVRHVLKLSNMADEDYYMVGWYDDAADTFVPAEGERGSDVRKWRRIDHGHLFGAKSFFDASKKRRVLWAWVDETDGHSDDVAKGWAGIQAFPRALWLDTDGKQLVQWPVEEIETLRRRRVALLGAEVGSGGLHEIAGIETQQADVEAIFEIPKLEAAEKFDPKWLQDPGKLCSESGGVGPFGLIAMASG…
>Si025317m.g
PVYYNGMYHLFYQYNPHGALWDVGNLSWGHSVSGDLVNWADLGNALDPTALFDANGCASVSVTILPDGNPVILYSGIDADRRQVQNIAFPKNPLDPLLREWVKPSYNPVVPLPADVSPDNFLHRRRGAASRDAVMAECPDLFPVAPRGAAEGLDTSARGPGVRHVLKVSMPDKLQDYYAVGRYDDETDTFTPDEEDARGGGGDYRRWRRIDHGHLYVSMTFFDARRNRRVLWAWVNESDSEADDVARGWSGLQSFPRALWLDAGGRQLVQWSVEEIETLRRRRADLVDAEVEAGGLREIGDVESSQADVDVVFEVPSLVRAEGLDPSRLLDADALCGEKGASVRGGVGPFGLLVMASGDDLREHTAVFFRVFRILHEYTVLMCTDLTRSSTMAGVYKPM…
>Si039535m.g
MAIRAWTWVVLLLLALLPSCRAAEAPSPQPSADPELAVDDGLRTGYHFQPPKHWINDPNGVMYYKGVYHLFYQYNPKGAVWGNIVWAHAVSTDLVDWIMLPPAIYPTAPFDVNGCWSGSATVLPDGTPVIMYTGIDGENRQVQNVAYPKDLSDPYLREWVKPDYNPVIAPGPGMNATAFRDPTTAWQGPDGLWRLVIGTKDNHRGLAVLYRSRDFKRWAPAKRALHSGDTGMWECPDFYPVTTSPAVGSGGGGSGNGTKHVLKVSLDLTRFEYYTFGEYDHATDTYVPDAALADGNDGLRYDYGNFYASKTFLDTAKQRRVLWGWANESDSATADIRKGWAGVQAIPRKIWLSSDGKQLVQWPVAEIESLRGAHANVTDTLVAGGSHFEVTGLASAAQA…
>LOC_Os02g32730.1
MGIAEVALHSMPGAFAAHSPASNLPLAADAARGRRRRSANSLHSSRALQGPVRFPGLRAAVECQCQRIDDLARVTEGNGAWVKDAVDKASHALGDVRVPGQAVGGNGSVNGSAAKPPPQRRKASSVEDEAWELLRESVVYYCGSPVGTIAANDPNDANPMNYDQVFIRDFIPSGIAFLLKGEYEIVRNFILHTLQLQSWEKTMDCHSPGQGLMPASFKVRTIPLDGDEDATEEVLDPDFGEAAIGRVAPVDSGLWWIILLRAYGKCSGDLTVQERIDVQTGIKMILKLCLADGFDMFPTLLVTDGSCMIDRRMGIHGHPLEIQALFYSALLCAREMLTPEDGSADLIRALNNRLIALSFHIREYYWVDMQKLNEIYRYKTEEYSYDAVNKFNIYPDQVS…
>LOC_Os01g22900.1
MNGQTPMGLAAAAAAAVRPCRRRLLSSATAAAAAATVATATPLFPRCPHPHHHLHGRRLPFLASAASQQQQQSGQTAASPATPPIPSDPRAAVSGNLPFFDRVLFPDTFPVETPPPSSAAASAAAAADEEVASALKAREETEAEREAWRLLRRAVVSYCGEPVGTVAAEDPECTETLNYDQVFIRDFVPSALAFLMRGETEIVRNFLLHTLQLQSWEKTVDCYSPGQGLMPASFKIRAVPLDDNNEAFEEVLDPDFGESAIGRVAPVDSGLWWIILLRAYCKITGDNALQERVDVQTGIKLILSLCLSDGFDMFPTLLVTDGSCMIDRRMGIHGHPLEIQALFYSALRCSREMLVMNDGSKNLLRAINNRLSALSFHIREYYWVDMKKINEIYRYKTEE…
>LOC_Os04g35280.1
MEVAGMRKASSHASMAAAAADPDDFDLTRMLNHRPRINVDRQRSFDDRSLAELSISGTASRGGGGGGYPAMMESYESMYSPGGGLRSLCGTPASSTRLSFDPHPLVFDAWDALRRSLVCFRGQPLGTIAAVDHSSDEVLNYDQVFVRDFVPSALAFLMNGEPEIVKNFLLKTLLLQGWEKRIDRFKLGEGAMPASFKVLKDAKRGGAERLVADFGESAIGRVAPVDSGFWWIILLRAYTKSTGDLSLAETAECQRGIRLIMNQCLAEGFDTFPTLLCADGCCMIDRRMGVYGYPIEIQALFFMALRCALLMLKPDAPEGKETMDRVATRLHALTYHMRSYFWLDFQQLNDVYRYRTEEYSHTAVNKFNVIPESIPDWVFDFMPSRGGYFVGNVSPARMD…
>LOC_Os04g33490.1
MEIARVVAPPLRLAWCPASRRWGRRKGRPPCPSSLPGPRHDHAVKRPGGEAAGGRSVNGAAPAPAPAPAEAPAKAPQRRQRRGPHDVEDEAWGLLRESVVRYCGSPVGTIAACDPNDASPLNYDQVFIRDFVPSGIAFLLKGDYEIVRNFILHTLQLQSWEKTMDCHSPGQGLMPASFKVRVVPLDGDDDVTEEVLDPDFGEAAIGRVAPVDSGLWWIILLRAYGKCSGDLSVQERIDVQTGIKMILKLCLADGFDMFPTLLVTDGSCMIDRRMGIHGHPLEIQALFYSALLCAREMLTPEDGSADLIRALNSRLIALSFHIREYYWLDKRKLNEIYRYKTEEYSYDAVNKFNIYPDQIPPWLVEWIPPKGGYFIGNLQPAHMDFRFFSLGNLWSIVSS…
>LOC_Os02g34560.1
MELAVGAGGMRRSASHTSLSESDDFDLSRLLNKPRINVERQRSFDDRSLSDVSYSGGGHGGTRGGFDGMYSPGGGLRSLVGTPASSALHSFEPHPIVGDAWEALRRSLVFFRGQPLGTIAAFDHASEEVLNYDQVFVRDFVPSALAFLMNGEPEIVRHFLLKTLLLQGWEKKVDRFKLGEGAMPASFKVLHDSKKGVDTLHADFGESAIGRVAPVDSGFWWIILLRAYTKSTGDLTLAETPECQKGMRLILSLCLSEGFDTFPTLLCADGCCMIDRRMGVYGYPIEIQALFFMALRCALQLLKHDNEGKEFVERIATRLHALSYHMRSYYWLDFQQLNDIYRYKTEEYSHTAVNKFNVIPDSIPDWLFDFMPCQGGFFIGNVSPARMDFRWFALGNMIA…
>LOC_Os11g07440.3
MKRVSSHVSIASEAEINLDLSRLLIDKPRLTLERKRSFDEQSWSELSHRQNDGFDSIMHSPAFPSGFDSPFSLGTLGDPHPLVNEAWEALRKSVVYFRGQPVGTIAAVDHASEEVLNYDQVFVRDFFPSALAFLMNNETDIVKNFLLKTLHLQSSEKMVDRFKLGAGAMPASFKVDRNRNRNTETLVADFGESAIGRVAPVDSGFWWIILLRAYTKYTADTSLAESPECQNCMRLILNLCLSEGFDTFPTLLCTDGCSMIDRRMGIYGYPIEIQALFYMALRCALQMLKPDGEGKDFIEKIGQRLHALTYHMRNYFWLDFPHLNNIYRYKTEEYSHTAVNKFNVIPDSIPDWVFDFMPCRGGYFLGNVSPAMMDFRWFALGNCIAIISSLATPEQSVAI…
>LOC_Os02g03320.1
MVLYADPPPPIKPPEIKIKELANKSTYESSMMEQKTRLHAIERHRSCEVSQAILSEVENRHQHQTLEPIKSPISGCSPSVESTTDTNTVHRHTVADAAWEALKKSIVHFRGQPIGTVAAIDKSQGALNYDQVFMRDFVPSALAFLMKGEPTIVKNFLLETARLQLREKMVDLFKLGQGVMPASFKVHHCNSKHKTESLLADFGETAIGRVAPVDSGLWWIILLHAYTIWTRDNSLAESPECQRAMRLILKLCLSEGFDTSPALLCADGCSMIDRRMGIYGYPIDIQALFFMALRCAVTLLKEDHNDDFVYQISRRIKALSYHLHSYYWLDFQRLNEIYRYKTEEYSETALNKFNVIPESIPDWIFDFMPSRGGYFIGNVSPARMDFRWFCLGNFIAILS…
>LOC_Os03g20020.1
MAAAAISHLRRGAPRHARALLYLSTRRFSSSSAAGVAPLAAVAASARRLLSTSVDSGASSTGESYKPPLFDPFRAASLASSAPPLESPPIEELPDDATPPPEEEPGLPAPEKDPVATACQHELEGLKAWVETVRSRKESTEEKEAWSLLGRSVVSYCGTAVGTVAANDPSTANQMLNYDQVFIRDFVPSAIAFLLKGEGDIVKNFLLHTLQLQSWEKTVDCYSPGQGLMPASFKVRSIPLDGNSEAFEEVLDPDFGESAIGRVAPVDSGLWWIILLRAYGKITGDYALQERVDVQTGIRLILNLCLSDGFDMFPTLLVTDGSCMIDRRMGIHGHPLEIQSLFYSALRCAREMVSVNDGSNSLIRAINYRLSALSFHIREYYWVDMKKINEIYRYKTEEY…
>LOC_Os04g45290.1
MVPDHWYDINGVWTGSATQLPDGRIVMLYTGATEESVQVQNLAEPADPNDPLLREWSKAEANPVLVPPPGIGLTDFRDPTTAWRNPADSAWRITIGSKDRDHAGLALVYKTEDFLHYDLLPTLLHVVKGTGMWECVDLYPVSTSPAVEDGLETSTPPGPGVKHVLKASLDDDRNDYYAIGTYDGETDTWTPDNADIDVGIGLRYDYGKFYASKTFYDPVGRRRVLWGWIGETDSERADILKGWASLQSIPRTVMLDTKTGSNLLQWPVVEVENLRMRGKSFDGLDVSPGSVVPLDVGKATQLDIEAVFEVDTSAADGVVTEAGAAAYSCGTGGGAVGRGLMGPFGLLVLADDQLSERTAVFFYLVKGVDGNLTTFFCQDELRSSKANDLVKRVYGSLVP…
>LOC_Os04g33740.1
MGVLGSRVAWAWLVQLLLLQQLAGASHVVYDDLELQAAATTADGVPPSIVDSELRTGYHFQPPKNWINGNAPMYYKGWYHLFYQYNPKGAVWGNIVWAHSVSRDLINWVALKPAIEPSIRADKYGCWSGSATMMADGTPVIMYTGVNRPDVNYQVQNVALPRNGSDPLLREWVKPGHNPVIVPEGGINATQFRDPTTAWRGADGHWRLLVGSLAGQSRGVAYVYRSRDFRRWTRAAQPLHSAPTGMWECPDFYPVTADGRREGVDTSSAVVDAAASARVKYVLKNSLDLRRYDYYTVGTYDRKAERYVPDDPAGDEHHIRYDYGNFYASKTFYDPAKRRRILWGWANESDTAADDVAKGWAGIQAIPRKVWLDPSGKQLLQWPIEEVERLRGKWPVILK…
>LOC_Os02g01590.1
METRDDVADASALPYSYSPLPAGDAASADLAAARRSRRRPLCVALFLASAAVILAVAVLSGVRLAGRPATTTMVVPGVVEMEMASRGPESGVSEKTSGAEEMVRLMGGAAGGEAFPWSNAMLQWQRTGFHFQPERNWMNDPNGPVYYKGWYHLFYQYNPDGAVWGNKIAWGHAVSRDLVHWRHLPLAMVPDQWYDVNGVWTGSATTLPDGRLAMLYTGSTNASVQVQCLAVPSDPDDPLLTNWTKYHANPVLYPPRTIGDRDFRDPTTAWRDPSDGDWRIVIGSKDEHHAGIAVVYRTADFVTYDLLPGLLHRVEATGMWECIDFYPVAGGEGVDMTEAMYARNKGVVHVMKASMDDDRHDYYALGRYDPARNAWTPLDAAADVGIGLRYDWGKFYASK…
>LOC_Os01g73580.1
MYYNGIYHEFYQYNPNGSVWGNIVWGHSVSTDLINWIRLEPAIEGNTPSDINGCWTGSATILTGDQPVIIYTGADTEKRQVQNIVLPKNRSDPYLREWTKPKNNPLIEPVGPGLNSNQFRDPTTGWIGPDGLWRIAVGAELNGYSAALLYKSKDFMQWTRVDHPLYSSNASNMWECPDFFAVLPGKNNGLDLSAAIPNGAKHVLKMSLDSCDKYMIGVYDLKHDMFVPDTVLDDRRLWLRIDYGNYYASKSFFDSKKGRRIIWGWTNETDSTSDDVAKGWAGIHAIPRTIWLDGDGKRLLQWPIEEVESLRRNEVSHQGLELKKGDLFEIKGTDTLQADVEIDFELTSIDAADPFDPSWLLDTEKHCREADASVHGGLGPFGLVVLASDNMDEHTTVHF…
>LOC_Os04g33720.1
MATARARAALVFVALLQMAAVVVVRASHVVYPELQSLEAKHVDGKLRTGYHFQPPKHWINGTYGPMYYKGLYHLFYQYNPKGAVWGNIEWAHSVSTDLIDWTALEPGIYPSKTFDEKGCWSGSATVLPSGVPVIMYTGIDPDERQVQNVAYPVNLSDPYLREWYKPDYNPIINPDGGINASAFRDPTTAWYGPDGHWRLLVGSKVNMKGLAVLYRSRDFKKWVKAHHPLHSAHTGMWECPDFFPVAVAGGSRHYRRGVDTAELHDAAVAEEVKYVLKVSLDLTRYEYYTVGWYDHATDRYVPDAAFPDNDYGLRYDYGDFYASKSFYDPAKRRRIVWGWANESDTVPDDRRKGWAGIQAIPRKLWLSADGKQLVQWPVEELKALRAKHVNVTDKVIKKG…
>LOC_Os04g56930.1
MAELPTTSSLPSSGRMMAGPLYHNGLYHFFYQYNPHGPLWDTGKLSWGHSVSGDLVNWAFLGTAIDPTDPFDVNGCWSGSATVLLGGRPAFLYTGRDAGGVQVQNVSFAKNPLDPLLREWEKPSCNPIIAFPADVINNNFRDPTTAWLGRDGLWRMVVAAEVAGAGSALVYRSADFLRWERNAAPMHSSAAVPVLECPDFFPVAEHGIDGLDTSANGGGTGVKHVLKLSEFDTHQDFYMARRNRRVQWLWVNEYDSKADDVAKGWAGVQAFPRKVWLDGDGKQLLQWPVDEIETLRTKRVGLQGTEVKAGGLHEIVGVASSQADVEVVFEIPNLEDEAESFDPDWLDPHKLCKDKGAASAHGGVGPFGLIVMASGDLQEQTAVFFRVFKHHGKYKVFMC…
>LOC_Os04g56920.1
MALAGLPLSVFAIAVHFCLVFSSSSSPPVCPANGHRDRTAYHFQPAKNWQNGAYGPVYYNGMYHLFYQYNPHGALWDVGNLSWGHSVSGDLVNWAALDNALDPTAPFDANGCASGSVTILPDGVPVVMYSGIDARRRQVQNVAFPKNPRDPLLREWTKPGYNPVIPVPADVSPDNFRDPTTAWLGSDGLWRFAISAVADGVGATLVYRSADFLRWERNAAPLHASRDAVMAECPDLFPVAEHGEDGLDLDASAIGGAGAGVRHVLKVSMPDTLEDYYMVGRYDDADDTFTVPPEDLEAHGDDYRRWRRIDHGHLYASKTFYDAGKKRRVLWAWVNESDSEADDVTKGWSGLQSFPRAVWLDEGGRQLVQWPVEEIETLRRKRGVLLGGNEVEAGGLREI…
>LOC_Os09g08072.1
MARLGLAVCAASFHLFLLLASTSSLRRAPTEADTANHARRTAYHFQPAKNWQNDAGPMYHNGMYHLFYQYNPHSALWDIGNLSWGHSVSGDLLNWAALDTALDPTSPFDANGCWSGSATILPGALPAILYTGIDASKEQVQNVAFAKNPSDPLLREWEKPAYNPVIALPADVPGDKFRDPSTAWLGRDGLWRIAVSAEVDGVASTLVYRSKDFVRWERNAAPLHASRAAGMVECPDLFPVAERGEDGLDTSANGAGGVRHVLKLSVMDTLQDYYMVGTYDDAADAFSPAEPERGDDCRSWRRLDYGHVYASKSFFDVRKNRRVLWAWANESDSQADDVARGWSGVQTFPRKMWLAKDGKQLLQWPIEEIKTLRRKRAGLWQGTRLGAGAVQEIVGVASS…
>LOC_Os09g0812.1
MYHLFYKYNPHSALWDIGNLSWGHFVSGDLLNWAALDTALDPTSPFDANGCWSGSATILPGGLPAILYTGIDAGKEQVQNVAFAKNPSDPLLREWEKPAYNPVIALPPDVPGDNFRDPSTAWLGRDGLWRIAVSAEVDGVASTLVYRSEDFVRWERNAAPLHASRAAGMVECPDMFPVAENGEDGLDTSTNGAGGVRHVLKLSVMDTLQDYYMVGTYDDAADAFSPAEPERGDDCRRWRRLDYGHTFPRKMWIAKDGKQLLQWPIEEIETLRRKRAAGLRRGTRLGAGAVQEIVGVASSQADVEVIDHSVVESFGGGGRACITARVYPEHVATSSSHLYVFNNGSDDVKVAKLEAWDLATATVNVVVGDHHGLAAPALELEPTRTTQ
>LOC_Os02g3311.1
MNATQFRDPTTAWYADGHWRMLVGGLKGARLGLAYLYRSRDFKTWVRAKHPLHSALTGMWECPDFFPLQAPGLQAGLDTSVPSSKYVLKNSLDLTRYDYYTVGIYNKVTERYVPDNPAGDYHRLRYDYGNFYASKTFFDPVKHRRILLGWANESDSVTYDKAKGWAGIHAIPRKVWLDPSGKQLLQWPIEELETLRGKSVSVFDKVVKPGEHFQVTGLGTYQADVEVSLEVSGLEKAEALDPAFGDDAERLCGAKGADVRGGVVFGLWVLASAGLEEKTAVFFRVFKPAGHGAKPVVLMCTDPTKSSLSPDLYKPTFAGFVDTDISSGKISLRSLIDRSVVESFGAGGKTCILSRVYPSMAIGDKAHLYVFNNGEADIKISHLKAWEMKKPLMNGA
