# Supplementary material for: Genome-wide identification and characterization of the sucrose invertase gene family in Hemerocallis citrina
Source: PeerJ. 2024 Aug 29;12:e17999. doi: 10.7717/peerj.17999 (PMC11366234; doi:10.7717/peerj.17999)
Supplement: Supplemental Information 8 [file peerj-12-17999-s008.xlsx]

## Sheet: Sheet1
sequences (HcINV*:HcINV*) Aligned. Score:
Sequences (1:2) Aligned. Score: 93.038
Sequences (1:3) Aligned. Score: 24.4726
Sequences (1:4) Aligned. Score: 46.6245
Sequences (1:5) Aligned. Score: 55.8719
Sequences (1:6) Aligned. Score: 43.4599
Sequences (1:7) Aligned. Score: 44.0928
Sequences (1:8) Aligned. Score: 47.6793
Sequences (1:9) Aligned. Score: 11.1814
Sequences (1:10) Aligned. Score: 30.3797
Sequences (1:11) Aligned. Score: 33.9662
Sequences (1:12) Aligned. Score: 10.3376
Sequences (1:13) Aligned. Score: 10.9705
Sequences (1:14) Aligned. Score: 32.0675
Sequences (1:15) Aligned. Score: 32.2785
Sequences (1:16) Aligned. Score: 29.9578
Sequences (1:17) Aligned. Score: 26.7932
Sequences (1:18) Aligned. Score: 51.8987
Sequences (1:19) Aligned. Score: 10.1149
Sequences (1:20) Aligned. Score: 51.8987
Sequences (1:21) Aligned. Score: 10.3376
Sequences (1:22) Aligned. Score: 36.2869
Sequences (1:23) Aligned. Score: 10.9705
Sequences (1:24) Aligned. Score: 12.3077
Sequences (1:25) Aligned. Score: 65.4008
Sequences (1:26) Aligned. Score: 66.2447
Sequences (1:27) Aligned. Score: 10.7595
Sequences (1:28) Aligned. Score: 10.4677
Sequences (1:29) Aligned. Score: 36.2869
Sequences (1:30) Aligned. Score: 36.2869
Sequences (1:31) Aligned. Score: 32.7004
Sequences (1:32) Aligned. Score: 34.8101
Sequences (1:33) Aligned. Score: 50
Sequences (1:34) Aligned. Score: 10.3376
Sequences (1:35) Aligned. Score: 10.4677
Sequences (2:3) Aligned. Score: 35.3941
Sequences (2:4) Aligned. Score: 52.9042
Sequences (2:5) Aligned. Score: 55.1601
Sequences (2:6) Aligned. Score: 54.1012
Sequences (2:7) Aligned. Score: 57.5592
Sequences (2:8) Aligned. Score: 53.2812
Sequences (2:9) Aligned. Score: 10.0156
Sequences (2:10) Aligned. Score: 35.9316
Sequences (2:11) Aligned. Score: 37.7083
Sequences (2:12) Aligned. Score: 11.418
Sequences (2:13) Aligned. Score: 11.6522
Sequences (2:14) Aligned. Score: 38.7833
Sequences (2:15) Aligned. Score: 34.9823
Sequences (2:16) Aligned. Score: 33.4526
Sequences (2:17) Aligned. Score: 19.6399
Sequences (2:18) Aligned. Score: 55.9055
Sequences (2:19) Aligned. Score: 11.0345
Sequences (2:20) Aligned. Score: 56.2399
Sequences (2:21) Aligned. Score: 10.0901
Sequences (2:22) Aligned. Score: 36.8512
Sequences (2:23) Aligned. Score: 9.89583
Sequences (2:24) Aligned. Score: 11.5385
Sequences (2:25) Aligned. Score: 67.5425
Sequences (2:26) Aligned. Score: 64.915
Sequences (2:27) Aligned. Score: 10.3041
Sequences (2:28) Aligned. Score: 10.0223
Sequences (2:29) Aligned. Score: 35.6784
Sequences (2:30) Aligned. Score: 36.8512
Sequences (2:31) Aligned. Score: 36.2522
Sequences (2:32) Aligned. Score: 33.3992
Sequences (2:33) Aligned. Score: 59.7222
Sequences (2:34) Aligned. Score: 11.418
Sequences (2:35) Aligned. Score: 10.245
Sequences (3:4) Aligned. Score: 57.9278
Sequences (3:5) Aligned. Score: 43.0605
Sequences (3:6) Aligned. Score: 41.5358
Sequences (3:7) Aligned. Score: 43.7158
Sequences (3:8) Aligned. Score: 56.7187
Sequences (3:9) Aligned. Score: 10.1721
Sequences (3:10) Aligned. Score: 19.962
Sequences (3:11) Aligned. Score: 17.9167
Sequences (3:12) Aligned. Score: 10.6814
Sequences (3:13) Aligned. Score: 10.087
Sequences (3:14) Aligned. Score: 23.0038
Sequences (3:15) Aligned. Score: 20.318
Sequences (3:16) Aligned. Score: 19.1413
Sequences (3:17) Aligned. Score: 11.784
Sequences (3:18) Aligned. Score: 33.2283
Sequences (3:19) Aligned. Score: 10.8046
Sequences (3:20) Aligned. Score: 36.4668
Sequences (3:21) Aligned. Score: 10.0901
Sequences (3:22) Aligned. Score: 19.7232
Sequences (3:23) Aligned. Score: 10.5903
Sequences (3:24) Aligned. Score: 11.1538
Sequences (3:25) Aligned. Score: 37.6344
Sequences (3:26) Aligned. Score: 35.023
Sequences (3:27) Aligned. Score: 10.473
Sequences (3:28) Aligned. Score: 11.3586
Sequences (3:29) Aligned. Score: 19.263
Sequences (3:30) Aligned. Score: 21.1073
Sequences (3:31) Aligned. Score: 20.1401
Sequences (3:32) Aligned. Score: 15.8103
Sequences (3:33) Aligned. Score: 36.2847
Sequences (3:34) Aligned. Score: 10.6814
Sequences (3:35) Aligned. Score: 11.1359
Sequences (4:5) Aligned. Score: 51.9573
Sequences (4:6) Aligned. Score: 53.9267
Sequences (4:7) Aligned. Score: 58.1056
Sequences (4:8) Aligned. Score: 91.2088
Sequences (4:9) Aligned. Score: 9.73312
Sequences (4:10) Aligned. Score: 34.7909
Sequences (4:11) Aligned. Score: 32.7083
Sequences (4:12) Aligned. Score: 10.4972
Sequences (4:13) Aligned. Score: 9.91304
Sequences (4:14) Aligned. Score: 33.27
Sequences (4:15) Aligned. Score: 34.2756
Sequences (4:16) Aligned. Score: 32.3792
Sequences (4:17) Aligned. Score: 16.5303
Sequences (4:18) Aligned. Score: 54.0157
Sequences (4:19) Aligned. Score: 11.0345
Sequences (4:20) Aligned. Score: 54.295
Sequences (4:21) Aligned. Score: 9.54955
Sequences (4:22) Aligned. Score: 34.083
Sequences (4:23) Aligned. Score: 10.2431
Sequences (4:24) Aligned. Score: 10.7692
Sequences (4:25) Aligned. Score: 57.6138
Sequences (4:26) Aligned. Score: 52.5903
Sequences (4:27) Aligned. Score: 10.3041
Sequences (4:28) Aligned. Score: 9.79955
Sequences (4:29) Aligned. Score: 32.8308
Sequences (4:30) Aligned. Score: 34.2561
Sequences (4:31) Aligned. Score: 33.8004
Sequences (4:32) Aligned. Score: 28.8538
Sequences (4:33) Aligned. Score: 56.9444
Sequences (4:34) Aligned. Score: 10.4972
Sequences (4:35) Aligned. Score: 10.245
Sequences (5:6) Aligned. Score: 86.8327
Sequences (5:7) Aligned. Score: 90.0356
Sequences (5:8) Aligned. Score: 50.8897
Sequences (5:9) Aligned. Score: 11.7438
Sequences (5:10) Aligned. Score: 25.2669
Sequences (5:11) Aligned. Score: 33.0961
Sequences (5:12) Aligned. Score: 12.0996
Sequences (5:13) Aligned. Score: 11.7438
Sequences (5:14) Aligned. Score: 32.7402
Sequences (5:15) Aligned. Score: 27.4021
Sequences (5:16) Aligned. Score: 24.911
Sequences (5:17) Aligned. Score: 23.4875
Sequences (5:18) Aligned. Score: 49.4662
Sequences (5:19) Aligned. Score: 9.96441
Sequences (5:20) Aligned. Score: 48.7544
Sequences (5:21) Aligned. Score: 11.3879
Sequences (5:22) Aligned. Score: 31.6726
Sequences (5:23) Aligned. Score: 11.032
Sequences (5:24) Aligned. Score: 10.7692
Sequences (5:25) Aligned. Score: 58.363
Sequences (5:26) Aligned. Score: 54.0925
Sequences (5:27) Aligned. Score: 12.8114
Sequences (5:28) Aligned. Score: 11.032
Sequences (5:29) Aligned. Score: 31.3167
Sequences (5:30) Aligned. Score: 31.6726
Sequences (5:31) Aligned. Score: 28.1139
Sequences (5:32) Aligned. Score: 31.6726
Sequences (5:33) Aligned. Score: 48.7544
Sequences (5:34) Aligned. Score: 12.0996
Sequences (5:35) Aligned. Score: 11.032
Sequences (6:7) Aligned. Score: 91.2568
Sequences (6:8) Aligned. Score: 53.4031
Sequences (6:9) Aligned. Score: 10.2967
Sequences (6:10) Aligned. Score: 29.2776
Sequences (6:11) Aligned. Score: 33.75
Sequences (6:12) Aligned. Score: 10.1289
Sequences (6:13) Aligned. Score: 10.4712
Sequences (6:14) Aligned. Score: 35.7414
Sequences (6:15) Aligned. Score: 28.9753
Sequences (6:16) Aligned. Score: 28.8014
Sequences (6:17) Aligned. Score: 20.7679
Sequences (6:18) Aligned. Score: 52.1815
Sequences (6:19) Aligned. Score: 9.65517
Sequences (6:20) Aligned. Score: 50.7853
Sequences (6:21) Aligned. Score: 10.4505
Sequences (6:22) Aligned. Score: 31.4136
Sequences (6:23) Aligned. Score: 10.8202
Sequences (6:24) Aligned. Score: 11.1538
Sequences (6:25) Aligned. Score: 57.4171
Sequences (6:26) Aligned. Score: 53.5777
Sequences (6:27) Aligned. Score: 10.2967
Sequences (6:28) Aligned. Score: 11.1359
Sequences (6:29) Aligned. Score: 31.2391
Sequences (6:30) Aligned. Score: 31.5881
Sequences (6:31) Aligned. Score: 29.0718
Sequences (6:32) Aligned. Score: 28.0632
Sequences (6:33) Aligned. Score: 51.1344
Sequences (6:34) Aligned. Score: 10.1289
Sequences (6:35) Aligned. Score: 11.3586
Sequences (7:8) Aligned. Score: 56.8306
Sequences (7:9) Aligned. Score: 10.5647
Sequences (7:10) Aligned. Score: 28.8973
Sequences (7:11) Aligned. Score: 32.0833
Sequences (7:12) Aligned. Score: 9.94475
Sequences (7:13) Aligned. Score: 10.3825
Sequences (7:14) Aligned. Score: 34.7909
Sequences (7:15) Aligned. Score: 29.326
Sequences (7:16) Aligned. Score: 28.7796
Sequences (7:17) Aligned. Score: 18.9435
Sequences (7:18) Aligned. Score: 55.7377
Sequences (7:19) Aligned. Score: 9.65517
Sequences (7:20) Aligned. Score: 53.9162
Sequences (7:21) Aligned. Score: 9.83607
Sequences (7:22) Aligned. Score: 31.5118
Sequences (7:23) Aligned. Score: 10.3825
Sequences (7:24) Aligned. Score: 10.7692
Sequences (7:25) Aligned. Score: 61.3843
Sequences (7:26) Aligned. Score: 57.1949
Sequences (7:27) Aligned. Score: 10.5647
Sequences (7:28) Aligned. Score: 9.79955
Sequences (7:29) Aligned. Score: 31.1475
Sequences (7:30) Aligned. Score: 31.694
Sequences (7:31) Aligned. Score: 30.4189
Sequences (7:32) Aligned. Score: 26.4822
Sequences (7:33) Aligned. Score: 54.827
Sequences (7:34) Aligned. Score: 9.94475
Sequences (7:35) Aligned. Score: 10.0223
Sequences (8:9) Aligned. Score: 9.85915
Sequences (8:10) Aligned. Score: 35.7414
Sequences (8:11) Aligned. Score: 33.125
Sequences (8:12) Aligned. Score: 10.1289
Sequences (8:13) Aligned. Score: 10.4348
Sequences (8:14) Aligned. Score: 34.0304
Sequences (8:15) Aligned. Score: 34.8057
Sequences (8:16) Aligned. Score: 33.2737
Sequences (8:17) Aligned. Score: 16.6939
Sequences (8:18) Aligned. Score: 53.5433
Sequences (8:19) Aligned. Score: 11.2644
Sequences (8:20) Aligned. Score: 54.6191
Sequences (8:21) Aligned. Score: 10.2703
Sequences (8:22) Aligned. Score: 33.91
Sequences (8:23) Aligned. Score: 10.7639
Sequences (8:24) Aligned. Score: 11.5385
Sequences (8:25) Aligned. Score: 57.3438
Sequences (8:26) Aligned. Score: 51.875
Sequences (8:27) Aligned. Score: 10.1351
Sequences (8:28) Aligned. Score: 10.9131
Sequences (8:29) Aligned. Score: 33.6683
Sequences (8:30) Aligned. Score: 34.083
Sequences (8:31) Aligned. Score: 34.8511
Sequences (8:32) Aligned. Score: 31.2253
Sequences (8:33) Aligned. Score: 57.2917
Sequences (8:34) Aligned. Score: 10.1289
Sequences (8:35) Aligned. Score: 10.6904
Sequences (9:10) Aligned. Score: 10.8365
Sequences (9:11) Aligned. Score: 10.2083
Sequences (9:12) Aligned. Score: 49.5396
Sequences (9:13) Aligned. Score: 47.6522
Sequences (9:14) Aligned. Score: 9.88593
Sequences (9:15) Aligned. Score: 10.6007
Sequences (9:16) Aligned. Score: 9.839
Sequences (9:17) Aligned. Score: 9.98363
Sequences (9:18) Aligned. Score: 11.0236
Sequences (9:19) Aligned. Score: 39.0805
Sequences (9:20) Aligned. Score: 10.2107
Sequences (9:21) Aligned. Score: 49.5495
Sequences (9:22) Aligned. Score: 10.2076
Sequences (9:23) Aligned. Score: 32.8125
Sequences (9:24) Aligned. Score: 50.3846
Sequences (9:25) Aligned. Score: 10.3286
Sequences (9:26) Aligned. Score: 10.4851
Sequences (9:27) Aligned. Score: 61.1486
Sequences (9:28) Aligned. Score: 42.3163
Sequences (9:29) Aligned. Score: 9.54774
Sequences (9:30) Aligned. Score: 10.2076
Sequences (9:31) Aligned. Score: 10.5079
Sequences (9:32) Aligned. Score: 10.4743
Sequences (9:33) Aligned. Score: 10.2431
Sequences (9:34) Aligned. Score: 49.7238
Sequences (9:35) Aligned. Score: 42.7617
Sequences (10:11) Aligned. Score: 45
Sequences (10:12) Aligned. Score: 9.88593
Sequences (10:13) Aligned. Score: 10.6464
Sequences (10:14) Aligned. Score: 48.289
Sequences (10:15) Aligned. Score: 73.5741
Sequences (10:16) Aligned. Score: 81.3688
Sequences (10:17) Aligned. Score: 43.7262
Sequences (10:18) Aligned. Score: 37.0722
Sequences (10:19) Aligned. Score: 11.7241
Sequences (10:20) Aligned. Score: 36.3118
Sequences (10:21) Aligned. Score: 9.69582
Sequences (10:22) Aligned. Score: 52.4715
Sequences (10:23) Aligned. Score: 10.4563
Sequences (10:24) Aligned. Score: 10.7692
Sequences (10:25) Aligned. Score: 35.7414
Sequences (10:26) Aligned. Score: 33.6502
Sequences (10:27) Aligned. Score: 10.4563
Sequences (10:28) Aligned. Score: 10.6904
Sequences (10:29) Aligned. Score: 52.2814
Sequences (10:30) Aligned. Score: 52.2814
Sequences (10:31) Aligned. Score: 58.9354
Sequences (10:32) Aligned. Score: 41.8972
Sequences (10:33) Aligned. Score: 36.8821
Sequences (10:34) Aligned. Score: 9.69582
Sequences (10:35) Aligned. Score: 10.6904
Sequences (11:12) Aligned. Score: 10.2083
Sequences (11:13) Aligned. Score: 10.2083
Sequences (11:14) Aligned. Score: 76.0417
Sequences (11:15) Aligned. Score: 45.8333
Sequences (11:16) Aligned. Score: 45.2083
Sequences (11:17) Aligned. Score: 35
Sequences (11:18) Aligned. Score: 36.6667
Sequences (11:19) Aligned. Score: 11.0345
Sequences (11:20) Aligned. Score: 36.25
Sequences (11:21) Aligned. Score: 9.79167
Sequences (11:22) Aligned. Score: 69.1667
Sequences (11:23) Aligned. Score: 10
Sequences (11:24) Aligned. Score: 10.3846
Sequences (11:25) Aligned. Score: 37.7083
Sequences (11:26) Aligned. Score: 36.6667
Sequences (11:27) Aligned. Score: 11.0417
Sequences (11:28) Aligned. Score: 10.6904
Sequences (11:29) Aligned. Score: 68.125
Sequences (11:30) Aligned. Score: 69.1667
Sequences (11:31) Aligned. Score: 50.4167
Sequences (11:32) Aligned. Score: 64.5833
Sequences (11:33) Aligned. Score: 36.875
Sequences (11:34) Aligned. Score: 10
Sequences (11:35) Aligned. Score: 10.6904
Sequences (12:13) Aligned. Score: 96.3168
Sequences (12:14) Aligned. Score: 9.88593
Sequences (12:15) Aligned. Score: 10.4972
Sequences (12:16) Aligned. Score: 11.0497
Sequences (12:17) Aligned. Score: 11.7864
Sequences (12:18) Aligned. Score: 10.4972
Sequences (12:19) Aligned. Score: 57.7011
Sequences (12:20) Aligned. Score: 10.8656
Sequences (12:21) Aligned. Score: 81.5838
Sequences (12:22) Aligned. Score: 9.94475
Sequences (12:23) Aligned. Score: 58.5635
Sequences (12:24) Aligned. Score: 80.3846
Sequences (12:25) Aligned. Score: 10.8656
Sequences (12:26) Aligned. Score: 10.3131
Sequences (12:27) Aligned. Score: 49.3554
Sequences (12:28) Aligned. Score: 69.0423
Sequences (12:29) Aligned. Score: 9.76059
Sequences (12:30) Aligned. Score: 10.1289
Sequences (12:31) Aligned. Score: 10.4972
Sequences (12:32) Aligned. Score: 9.28854
Sequences (12:33) Aligned. Score: 9.76059
Sequences (12:34) Aligned. Score: 99.8158
Sequences (12:35) Aligned. Score: 69.265
Sequences (13:14) Aligned. Score: 10.8365
Sequences (13:15) Aligned. Score: 10.7774
Sequences (13:16) Aligned. Score: 10.5546
Sequences (13:17) Aligned. Score: 11.3043
Sequences (13:18) Aligned. Score: 10.087
Sequences (13:19) Aligned. Score: 58.8506
Sequences (13:20) Aligned. Score: 10.4348
Sequences (13:21) Aligned. Score: 80.7207
Sequences (13:22) Aligned. Score: 9.3913
Sequences (13:23) Aligned. Score: 56.3478
Sequences (13:24) Aligned. Score: 81.5385
Sequences (13:25) Aligned. Score: 11.1304
Sequences (13:26) Aligned. Score: 10.4348
Sequences (13:27) Aligned. Score: 46.7826
Sequences (13:28) Aligned. Score: 70.1559
Sequences (13:29) Aligned. Score: 10.2609
Sequences (13:30) Aligned. Score: 9.73913
Sequences (13:31) Aligned. Score: 9.98249
Sequences (13:32) Aligned. Score: 9.88142
Sequences (13:33) Aligned. Score: 8.86957
Sequences (13:34) Aligned. Score: 96.5009
Sequences (13:35) Aligned. Score: 70.3786
Sequences (14:15) Aligned. Score: 50
Sequences (14:16) Aligned. Score: 49.2395
Sequences (14:17) Aligned. Score: 32.6996
Sequences (14:18) Aligned. Score: 37.4525
Sequences (14:19) Aligned. Score: 9.65517
Sequences (14:20) Aligned. Score: 36.8821
Sequences (14:21) Aligned. Score: 10.2662
Sequences (14:22) Aligned. Score: 73.384
Sequences (14:23) Aligned. Score: 9.31559
Sequences (14:24) Aligned. Score: 12.6923
Sequences (14:25) Aligned. Score: 38.2129
Sequences (14:26) Aligned. Score: 37.2624
Sequences (14:27) Aligned. Score: 9.88593
Sequences (14:28) Aligned. Score: 11.3586
Sequences (14:29) Aligned. Score: 73.1939
Sequences (14:30) Aligned. Score: 73.1939
Sequences (14:31) Aligned. Score: 55.5133
Sequences (14:32) Aligned. Score: 58.1028
Sequences (14:33) Aligned. Score: 37.2624
Sequences (14:34) Aligned. Score: 9.88593
Sequences (14:35) Aligned. Score: 11.1359
Sequences (15:16) Aligned. Score: 72.4508
Sequences (15:17) Aligned. Score: 37.4558
Sequences (15:18) Aligned. Score: 37.8092
Sequences (15:19) Aligned. Score: 11.7241
Sequences (15:20) Aligned. Score: 34.629
Sequences (15:21) Aligned. Score: 10.4505
Sequences (15:22) Aligned. Score: 50.53
Sequences (15:23) Aligned. Score: 10.9541
Sequences (15:24) Aligned. Score: 11.5385
Sequences (15:25) Aligned. Score: 35.159
Sequences (15:26) Aligned. Score: 32.8622
Sequences (15:27) Aligned. Score: 10.7774
Sequences (15:28) Aligned. Score: 10.6904
Sequences (15:29) Aligned. Score: 50.3534
Sequences (15:30) Aligned. Score: 50.3534
Sequences (15:31) Aligned. Score: 57.0671
Sequences (15:32) Aligned. Score: 43.2806
Sequences (15:33) Aligned. Score: 37.2792
Sequences (15:34) Aligned. Score: 10.4972
Sequences (15:35) Aligned. Score: 10.6904
Sequences (16:17) Aligned. Score: 42.0394
Sequences (16:18) Aligned. Score: 35.7782
Sequences (16:19) Aligned. Score: 10.1149
Sequences (16:20) Aligned. Score: 33.8104
Sequences (16:21) Aligned. Score: 9.54955
Sequences (16:22) Aligned. Score: 50.0894
Sequences (16:23) Aligned. Score: 9.839
Sequences (16:24) Aligned. Score: 10.3846
Sequences (16:25) Aligned. Score: 34.1682
Sequences (16:26) Aligned. Score: 31.4848
Sequences (16:27) Aligned. Score: 10.3757
Sequences (16:28) Aligned. Score: 10.4677
Sequences (16:29) Aligned. Score: 50.2683
Sequences (16:30) Aligned. Score: 49.9106
Sequences (16:31) Aligned. Score: 59.2129
Sequences (16:32) Aligned. Score: 43.2806
Sequences (16:33) Aligned. Score: 35.5993
Sequences (16:34) Aligned. Score: 10.4972
Sequences (16:35) Aligned. Score: 10.4677
Sequences (17:18) Aligned. Score: 19.9673
Sequences (17:19) Aligned. Score: 10.3448
Sequences (17:20) Aligned. Score: 19.6399
Sequences (17:21) Aligned. Score: 11.7117
Sequences (17:22) Aligned. Score: 31.1419
Sequences (17:23) Aligned. Score: 10.2431
Sequences (17:24) Aligned. Score: 12.3077
Sequences (17:25) Aligned. Score: 19.3126
Sequences (17:26) Aligned. Score: 19.6399
Sequences (17:27) Aligned. Score: 10.9797
Sequences (17:28) Aligned. Score: 10.4677
Sequences (17:29) Aligned. Score: 31.1558
Sequences (17:30) Aligned. Score: 31.1419
Sequences (17:31) Aligned. Score: 37.303
Sequences (17:32) Aligned. Score: 38.9328
Sequences (17:33) Aligned. Score: 21.875
Sequences (17:34) Aligned. Score: 10.8656
Sequences (17:35) Aligned. Score: 11.3586
Sequences (18:19) Aligned. Score: 10.8046
Sequences (18:20) Aligned. Score: 86.3857
Sequences (18:21) Aligned. Score: 10.0901
Sequences (18:22) Aligned. Score: 39.1003
Sequences (18:23) Aligned. Score: 10.7639
Sequences (18:24) Aligned. Score: 11.1538
Sequences (18:25) Aligned. Score: 61.8898
Sequences (18:26) Aligned. Score: 53.8583
Sequences (18:27) Aligned. Score: 9.45946
Sequences (18:28) Aligned. Score: 10.245
Sequences (18:29) Aligned. Score: 38.0235
Sequences (18:30) Aligned. Score: 39.2734
Sequences (18:31) Aligned. Score: 37.8284
Sequences (18:32) Aligned. Score: 34.1897
Sequences (18:33) Aligned. Score: 98.4375
Sequences (18:34) Aligned. Score: 10.3131
Sequences (18:35) Aligned. Score: 10.245
Sequences (19:20) Aligned. Score: 10.1149
Sequences (19:21) Aligned. Score: 52.8736
Sequences (19:22) Aligned. Score: 10.5747
Sequences (19:23) Aligned. Score: 57.0115
Sequences (19:24) Aligned. Score: 68.0769
Sequences (19:25) Aligned. Score: 11.0345
Sequences (19:26) Aligned. Score: 10.8046
Sequences (19:27) Aligned. Score: 38.8506
Sequences (19:28) Aligned. Score: 56.7816
Sequences (19:29) Aligned. Score: 11.0345
Sequences (19:30) Aligned. Score: 10.3448
Sequences (19:31) Aligned. Score: 9.42529
Sequences (19:32) Aligned. Score: 10.5747
Sequences (19:33) Aligned. Score: 11.7241
Sequences (19:34) Aligned. Score: 57.931
Sequences (19:35) Aligned. Score: 57.0115
Sequences (20:21) Aligned. Score: 10.2703
Sequences (20:22) Aligned. Score: 37.5433
Sequences (20:23) Aligned. Score: 10.5903
Sequences (20:24) Aligned. Score: 11.5385
Sequences (20:25) Aligned. Score: 60.1297
Sequences (20:26) Aligned. Score: 55.5916
Sequences (20:27) Aligned. Score: 10.6419
Sequences (20:28) Aligned. Score: 10.9131
Sequences (20:29) Aligned. Score: 36.5159
Sequences (20:30) Aligned. Score: 37.5433
Sequences (20:31) Aligned. Score: 36.4273
Sequences (20:32) Aligned. Score: 33.7945
Sequences (20:33) Aligned. Score: 89.2361
Sequences (20:34) Aligned. Score: 10.8656
Sequences (20:35) Aligned. Score: 11.1359
Sequences (21:22) Aligned. Score: 9.54955
Sequences (21:23) Aligned. Score: 54.955
Sequences (21:24) Aligned. Score: 70.7692
Sequences (21:25) Aligned. Score: 10.4505
Sequences (21:26) Aligned. Score: 10.4505
Sequences (21:27) Aligned. Score: 49.1892
Sequences (21:28) Aligned. Score: 89.0869
Sequences (21:29) Aligned. Score: 8.82883
Sequences (21:30) Aligned. Score: 10.4505
Sequences (21:31) Aligned. Score: 9.54955
Sequences (21:32) Aligned. Score: 9.68379
Sequences (21:33) Aligned. Score: 9.72973
Sequences (21:34) Aligned. Score: 81.3996
Sequences (21:35) Aligned. Score: 89.3096
Sequences (22:23) Aligned. Score: 9.54861
Sequences (22:24) Aligned. Score: 13.0769
Sequences (22:25) Aligned. Score: 36.8512
Sequences (22:26) Aligned. Score: 34.4291
Sequences (22:27) Aligned. Score: 9.68858
Sequences (22:28) Aligned. Score: 9.1314
Sequences (22:29) Aligned. Score: 89.4464
Sequences (22:30) Aligned. Score: 99.1349
Sequences (22:31) Aligned. Score: 53.2399
Sequences (22:32) Aligned. Score: 80.0395
Sequences (22:33) Aligned. Score: 38.7153
Sequences (22:34) Aligned. Score: 9.94475
Sequences (22:35) Aligned. Score: 9.1314
Sequences (23:24) Aligned. Score: 75
Sequences (23:25) Aligned. Score: 11.8056
Sequences (23:26) Aligned. Score: 11.4583
Sequences (23:27) Aligned. Score: 31.0764
Sequences (23:28) Aligned. Score: 68.5969
Sequences (23:29) Aligned. Score: 9.72222
Sequences (23:30) Aligned. Score: 9.54861
Sequences (23:31) Aligned. Score: 9.80736
Sequences (23:32) Aligned. Score: 10.6719
Sequences (23:33) Aligned. Score: 10.5903
Sequences (23:34) Aligned. Score: 58.3794
Sequences (23:35) Aligned. Score: 68.8196
Sequences (24:25) Aligned. Score: 11.5385
Sequences (24:26) Aligned. Score: 11.9231
Sequences (24:27) Aligned. Score: 50.3846
Sequences (24:28) Aligned. Score: 71.5385
Sequences (24:29) Aligned. Score: 13.0769
Sequences (24:30) Aligned. Score: 12.3077
Sequences (24:31) Aligned. Score: 10.7692
Sequences (24:32) Aligned. Score: 11.9231
Sequences (24:33) Aligned. Score: 11.1538
Sequences (24:34) Aligned. Score: 80.3846
Sequences (24:35) Aligned. Score: 71.9231
Sequences (25:26) Aligned. Score: 67.4312
Sequences (25:27) Aligned. Score: 11.1486
Sequences (25:28) Aligned. Score: 12.4722
Sequences (25:29) Aligned. Score: 34.5059
Sequences (25:30) Aligned. Score: 36.8512
Sequences (25:31) Aligned. Score: 35.3765
Sequences (25:32) Aligned. Score: 33.3992
Sequences (25:33) Aligned. Score: 65.7986
Sequences (25:34) Aligned. Score: 10.6814
Sequences (25:35) Aligned. Score: 12.4722
Sequences (26:27) Aligned. Score: 10.9797
Sequences (26:28) Aligned. Score: 10.9131
Sequences (26:29) Aligned. Score: 33.1658
Sequences (26:30) Aligned. Score: 33.91
Sequences (26:31) Aligned. Score: 34.3257
Sequences (26:32) Aligned. Score: 30.4348
Sequences (26:33) Aligned. Score: 57.9861
Sequences (26:34) Aligned. Score: 10.3131
Sequences (26:35) Aligned. Score: 10.6904
Sequences (27:28) Aligned. Score: 39.8664
Sequences (27:29) Aligned. Score: 9.7973
Sequences (27:30) Aligned. Score: 9.68858
Sequences (27:31) Aligned. Score: 10.8581
Sequences (27:32) Aligned. Score: 9.68379
Sequences (27:33) Aligned. Score: 9.72222
Sequences (27:34) Aligned. Score: 49.5396
Sequences (27:35) Aligned. Score: 40.0891
Sequences (28:29) Aligned. Score: 10.245
Sequences (28:30) Aligned. Score: 9.79955
Sequences (28:31) Aligned. Score: 10.9131
Sequences (28:32) Aligned. Score: 11.1359
Sequences (28:33) Aligned. Score: 10.9131
Sequences (28:34) Aligned. Score: 68.8196
Sequences (28:35) Aligned. Score: 99.5546
Sequences (29:30) Aligned. Score: 89.7924
Sequences (29:31) Aligned. Score: 54.2907
Sequences (29:32) Aligned. Score: 87.9447
Sequences (29:33) Aligned. Score: 38.1944
Sequences (29:34) Aligned. Score: 9.94475
Sequences (29:35) Aligned. Score: 10.245
Sequences (30:31) Aligned. Score: 53.2399
Sequences (30:32) Aligned. Score: 80.2372
Sequences (30:33) Aligned. Score: 38.8889
Sequences (30:34) Aligned. Score: 10.1289
Sequences (30:35) Aligned. Score: 9.79955
Sequences (31:32) Aligned. Score: 47.8261
Sequences (31:33) Aligned. Score: 37.4781
Sequences (31:34) Aligned. Score: 10.3131
Sequences (31:35) Aligned. Score: 10.245
Sequences (32:33) Aligned. Score: 34.3874
Sequences (32:34) Aligned. Score: 9.28854
Sequences (32:35) Aligned. Score: 10.9131
Sequences (33:34) Aligned. Score: 9.76059
Sequences (33:35) Aligned. Score: 11.5813
Sequences (34:35) Aligned. Score: 69.0423
