# Supplementary material for: Genome-wide identification and characterization of the sucrose invertase gene family in Hemerocallis citrina
Source: PeerJ. 2024 Aug 29;12:e17999. doi: 10.7717/peerj.17999 (PMC11366234; doi:10.7717/peerj.17999)
Supplement: Supplemental Information 9 [file peerj-12-17999-s009.xls]

## Sheet: famid_motifs_stat
Famid	Nums	Motif_name	Motif_seq
HcINV1	8	motif1;motif2;motif6;motif7;motif9;motif12;motif13;motif15	DEVKKRRILWGWSGETDSREDDIAKGWASVQTIPR;PLAMVPDHWYDINGCWSGSATILPDNKPVILYTGIDN;AJLYRSKDFVNWTRAPGPLHSVNGTGMWECPDFYPVSTKGK;PNGPMYYKGWYHLFYQYNPBSAVW;EHRQVQNLAYPKBLSDPLLLEWVKPDYNPIJEPPPGI;PDDPSPDVGIGLRYDYGKFYASKTFY;DKTGSNLJQWPIEEVESLRTKGKDFSBITLKTGSTVEJDVGDASQLDIEV;VKYVLKASLDDTRHDYYAJGTY
HcINV10	8	motif1;motif2;motif6;motif7;motif8;motif9;motif11;motif13	DEVKKRRILWGWSGETDSREDDIAKGWASVQTIPR;PLAMVPDHWYDINGCWSGSATILPDNKPVILYTGIDN;AJLYRSKDFVNWTRAPGPLHSVNGTGMWECPDFYPVSTKGK;PNGPMYYKGWYHLFYQYNPBSAVW;RILVDHSIVESFAQGGRTCITSRVYPTEAIYNAARVFLFNNATEAVVIAK;EHRQVQNLAYPKBLSDPLLLEWVKPDYNPIJEPPPGI;LGPFGLLVLASKBLTEQTAVYFYVFKGPD;DKTGSNLJQWPIEEVESLRTKGKDFSBITLKTGSTVEJDVGDASQLDIEV
HcINV11	9	motif1;motif2;motif6;motif7;motif9;motif11;motif12;motif13;motif15	DEVKKRRILWGWSGETDSREDDIAKGWASVQTIPR;PLAMVPDHWYDINGCWSGSATILPDNKPVILYTGIDN;AJLYRSKDFVNWTRAPGPLHSVNGTGMWECPDFYPVSTKGK;PNGPMYYKGWYHLFYQYNPBSAVW;EHRQVQNLAYPKBLSDPLLLEWVKPDYNPIJEPPPGI;LGPFGLLVLASKBLTEQTAVYFYVFKGPD;PDDPSPDVGIGLRYDYGKFYASKTFY;DKTGSNLJQWPIEEVESLRTKGKDFSBITLKTGSTVEJDVGDASQLDIEV;VKYVLKASLDDTRHDYYAJGTY
HcINV12	5	motif3;motif4;motif5;motif10;motif14	YHMRSYFWLDFQQLNDIYRYKTEEYSHTAVNKFNVIPDSIPDWVFDFMPT;EGHEWRIVTGCDPKNTRWSYHNGGSWPVLLWLLTAACIKTGRPQIARRAI;MDFRWFALGNCIAILSSLATPEQSAAIMDLIEARWEELVGEMPLKIAYPA;RLLKDGWPEYYDGKLGRYIGKQARKYQTWSIAGYLVAKMLLEDPSHLGMI;MIDRRMGIYGYPIEIQALFFMALRCALPMLKHDAEGKELIERIVKRLHAL
HcINV13	5	motif3;motif4;motif5;motif10;motif14	YHMRSYFWLDFQQLNDIYRYKTEEYSHTAVNKFNVIPDSIPDWVFDFMPT;EGHEWRIVTGCDPKNTRWSYHNGGSWPVLLWLLTAACIKTGRPQIARRAI;MDFRWFALGNCIAILSSLATPEQSAAIMDLIEARWEELVGEMPLKIAYPA;RLLKDGWPEYYDGKLGRYIGKQARKYQTWSIAGYLVAKMLLEDPSHLGMI;MIDRRMGIYGYPIEIQALFFMALRCALPMLKHDAEGKELIERIVKRLHAL
HcINV14	9	motif1;motif2;motif6;motif8;motif9;motif11;motif12;motif13;motif15	DEVKKRRILWGWSGETDSREDDIAKGWASVQTIPR;PLAMVPDHWYDINGCWSGSATILPDNKPVILYTGIDN;AJLYRSKDFVNWTRAPGPLHSVNGTGMWECPDFYPVSTKGK;RILVDHSIVESFAQGGRTCITSRVYPTEAIYNAARVFLFNNATEAVVIAK;EHRQVQNLAYPKBLSDPLLLEWVKPDYNPIJEPPPGI;LGPFGLLVLASKBLTEQTAVYFYVFKGPD;PDDPSPDVGIGLRYDYGKFYASKTFY;DKTGSNLJQWPIEEVESLRTKGKDFSBITLKTGSTVEJDVGDASQLDIEV;VKYVLKASLDDTRHDYYAJGTY
HcINV15	8	motif1;motif2;motif6;motif7;motif8;motif9;motif11;motif13	DEVKKRRILWGWSGETDSREDDIAKGWASVQTIPR;PLAMVPDHWYDINGCWSGSATILPDNKPVILYTGIDN;AJLYRSKDFVNWTRAPGPLHSVNGTGMWECPDFYPVSTKGK;PNGPMYYKGWYHLFYQYNPBSAVW;RILVDHSIVESFAQGGRTCITSRVYPTEAIYNAARVFLFNNATEAVVIAK;EHRQVQNLAYPKBLSDPLLLEWVKPDYNPIJEPPPGI;LGPFGLLVLASKBLTEQTAVYFYVFKGPD;DKTGSNLJQWPIEEVESLRTKGKDFSBITLKTGSTVEJDVGDASQLDIEV
HcINV16	8	motif1;motif2;motif6;motif7;motif8;motif9;motif11;motif13	DEVKKRRILWGWSGETDSREDDIAKGWASVQTIPR;PLAMVPDHWYDINGCWSGSATILPDNKPVILYTGIDN;AJLYRSKDFVNWTRAPGPLHSVNGTGMWECPDFYPVSTKGK;PNGPMYYKGWYHLFYQYNPBSAVW;RILVDHSIVESFAQGGRTCITSRVYPTEAIYNAARVFLFNNATEAVVIAK;EHRQVQNLAYPKBLSDPLLLEWVKPDYNPIJEPPPGI;LGPFGLLVLASKBLTEQTAVYFYVFKGPD;DKTGSNLJQWPIEEVESLRTKGKDFSBITLKTGSTVEJDVGDASQLDIEV
HcINV17	8	motif1;motif2;motif6;motif7;motif9;motif11;motif13;motif15	DEVKKRRILWGWSGETDSREDDIAKGWASVQTIPR;PLAMVPDHWYDINGCWSGSATILPDNKPVILYTGIDN;AJLYRSKDFVNWTRAPGPLHSVNGTGMWECPDFYPVSTKGK;PNGPMYYKGWYHLFYQYNPBSAVW;EHRQVQNLAYPKBLSDPLLLEWVKPDYNPIJEPPPGI;LGPFGLLVLASKBLTEQTAVYFYVFKGPD;DKTGSNLJQWPIEEVESLRTKGKDFSBITLKTGSTVEJDVGDASQLDIEV;VKYVLKASLDDTRHDYYAJGTY
HcINV18	10	motif1;motif2;motif6;motif7;motif8;motif9;motif11;motif12;motif13;motif15	DEVKKRRILWGWSGETDSREDDIAKGWASVQTIPR;PLAMVPDHWYDINGCWSGSATILPDNKPVILYTGIDN;AJLYRSKDFVNWTRAPGPLHSVNGTGMWECPDFYPVSTKGK;PNGPMYYKGWYHLFYQYNPBSAVW;RILVDHSIVESFAQGGRTCITSRVYPTEAIYNAARVFLFNNATEAVVIAK;EHRQVQNLAYPKBLSDPLLLEWVKPDYNPIJEPPPGI;LGPFGLLVLASKBLTEQTAVYFYVFKGPD;PDDPSPDVGIGLRYDYGKFYASKTFY;DKTGSNLJQWPIEEVESLRTKGKDFSBITLKTGSTVEJDVGDASQLDIEV;VKYVLKASLDDTRHDYYAJGTY
HcINV19	5	motif3;motif4;motif5;motif10;motif14	YHMRSYFWLDFQQLNDIYRYKTEEYSHTAVNKFNVIPDSIPDWVFDFMPT;EGHEWRIVTGCDPKNTRWSYHNGGSWPVLLWLLTAACIKTGRPQIARRAI;MDFRWFALGNCIAILSSLATPEQSAAIMDLIEARWEELVGEMPLKIAYPA;RLLKDGWPEYYDGKLGRYIGKQARKYQTWSIAGYLVAKMLLEDPSHLGMI;MIDRRMGIYGYPIEIQALFFMALRCALPMLKHDAEGKELIERIVKRLHAL
HcINV2	10	motif1;motif2;motif6;motif7;motif8;motif9;motif11;motif12;motif13;motif15	DEVKKRRILWGWSGETDSREDDIAKGWASVQTIPR;PLAMVPDHWYDINGCWSGSATILPDNKPVILYTGIDN;AJLYRSKDFVNWTRAPGPLHSVNGTGMWECPDFYPVSTKGK;PNGPMYYKGWYHLFYQYNPBSAVW;RILVDHSIVESFAQGGRTCITSRVYPTEAIYNAARVFLFNNATEAVVIAK;EHRQVQNLAYPKBLSDPLLLEWVKPDYNPIJEPPPGI;LGPFGLLVLASKBLTEQTAVYFYVFKGPD;PDDPSPDVGIGLRYDYGKFYASKTFY;DKTGSNLJQWPIEEVESLRTKGKDFSBITLKTGSTVEJDVGDASQLDIEV;VKYVLKASLDDTRHDYYAJGTY
HcINV20	10	motif1;motif2;motif6;motif7;motif8;motif9;motif11;motif12;motif13;motif15	DEVKKRRILWGWSGETDSREDDIAKGWASVQTIPR;PLAMVPDHWYDINGCWSGSATILPDNKPVILYTGIDN;AJLYRSKDFVNWTRAPGPLHSVNGTGMWECPDFYPVSTKGK;PNGPMYYKGWYHLFYQYNPBSAVW;RILVDHSIVESFAQGGRTCITSRVYPTEAIYNAARVFLFNNATEAVVIAK;EHRQVQNLAYPKBLSDPLLLEWVKPDYNPIJEPPPGI;LGPFGLLVLASKBLTEQTAVYFYVFKGPD;PDDPSPDVGIGLRYDYGKFYASKTFY;DKTGSNLJQWPIEEVESLRTKGKDFSBITLKTGSTVEJDVGDASQLDIEV;VKYVLKASLDDTRHDYYAJGTY
HcINV21	5	motif3;motif4;motif5;motif10;motif14	YHMRSYFWLDFQQLNDIYRYKTEEYSHTAVNKFNVIPDSIPDWVFDFMPT;EGHEWRIVTGCDPKNTRWSYHNGGSWPVLLWLLTAACIKTGRPQIARRAI;MDFRWFALGNCIAILSSLATPEQSAAIMDLIEARWEELVGEMPLKIAYPA;RLLKDGWPEYYDGKLGRYIGKQARKYQTWSIAGYLVAKMLLEDPSHLGMI;MIDRRMGIYGYPIEIQALFFMALRCALPMLKHDAEGKELIERIVKRLHAL
HcINV22	10	motif1;motif2;motif6;motif7;motif8;motif9;motif11;motif12;motif13;motif15	DEVKKRRILWGWSGETDSREDDIAKGWASVQTIPR;PLAMVPDHWYDINGCWSGSATILPDNKPVILYTGIDN;AJLYRSKDFVNWTRAPGPLHSVNGTGMWECPDFYPVSTKGK;PNGPMYYKGWYHLFYQYNPBSAVW;RILVDHSIVESFAQGGRTCITSRVYPTEAIYNAARVFLFNNATEAVVIAK;EHRQVQNLAYPKBLSDPLLLEWVKPDYNPIJEPPPGI;LGPFGLLVLASKBLTEQTAVYFYVFKGPD;PDDPSPDVGIGLRYDYGKFYASKTFY;DKTGSNLJQWPIEEVESLRTKGKDFSBITLKTGSTVEJDVGDASQLDIEV;VKYVLKASLDDTRHDYYAJGTY
HcINV23	5	motif3;motif4;motif5;motif10;motif14	YHMRSYFWLDFQQLNDIYRYKTEEYSHTAVNKFNVIPDSIPDWVFDFMPT;EGHEWRIVTGCDPKNTRWSYHNGGSWPVLLWLLTAACIKTGRPQIARRAI;MDFRWFALGNCIAILSSLATPEQSAAIMDLIEARWEELVGEMPLKIAYPA;RLLKDGWPEYYDGKLGRYIGKQARKYQTWSIAGYLVAKMLLEDPSHLGMI;MIDRRMGIYGYPIEIQALFFMALRCALPMLKHDAEGKELIERIVKRLHAL
HcINV24	3	motif3;motif4;motif5	YHMRSYFWLDFQQLNDIYRYKTEEYSHTAVNKFNVIPDSIPDWVFDFMPT;EGHEWRIVTGCDPKNTRWSYHNGGSWPVLLWLLTAACIKTGRPQIARRAI;MDFRWFALGNCIAILSSLATPEQSAAIMDLIEARWEELVGEMPLKIAYPA
HcINV25	10	motif1;motif2;motif6;motif7;motif8;motif9;motif11;motif12;motif13;motif15	DEVKKRRILWGWSGETDSREDDIAKGWASVQTIPR;PLAMVPDHWYDINGCWSGSATILPDNKPVILYTGIDN;AJLYRSKDFVNWTRAPGPLHSVNGTGMWECPDFYPVSTKGK;PNGPMYYKGWYHLFYQYNPBSAVW;RILVDHSIVESFAQGGRTCITSRVYPTEAIYNAARVFLFNNATEAVVIAK;EHRQVQNLAYPKBLSDPLLLEWVKPDYNPIJEPPPGI;LGPFGLLVLASKBLTEQTAVYFYVFKGPD;PDDPSPDVGIGLRYDYGKFYASKTFY;DKTGSNLJQWPIEEVESLRTKGKDFSBITLKTGSTVEJDVGDASQLDIEV;VKYVLKASLDDTRHDYYAJGTY
HcINV26	10	motif1;motif2;motif6;motif7;motif8;motif9;motif11;motif12;motif13;motif15	DEVKKRRILWGWSGETDSREDDIAKGWASVQTIPR;PLAMVPDHWYDINGCWSGSATILPDNKPVILYTGIDN;AJLYRSKDFVNWTRAPGPLHSVNGTGMWECPDFYPVSTKGK;PNGPMYYKGWYHLFYQYNPBSAVW;RILVDHSIVESFAQGGRTCITSRVYPTEAIYNAARVFLFNNATEAVVIAK;EHRQVQNLAYPKBLSDPLLLEWVKPDYNPIJEPPPGI;LGPFGLLVLASKBLTEQTAVYFYVFKGPD;PDDPSPDVGIGLRYDYGKFYASKTFY;DKTGSNLJQWPIEEVESLRTKGKDFSBITLKTGSTVEJDVGDASQLDIEV;VKYVLKASLDDTRHDYYAJGTY
HcINV27	5	motif3;motif4;motif5;motif10;motif14	YHMRSYFWLDFQQLNDIYRYKTEEYSHTAVNKFNVIPDSIPDWVFDFMPT;EGHEWRIVTGCDPKNTRWSYHNGGSWPVLLWLLTAACIKTGRPQIARRAI;MDFRWFALGNCIAILSSLATPEQSAAIMDLIEARWEELVGEMPLKIAYPA;RLLKDGWPEYYDGKLGRYIGKQARKYQTWSIAGYLVAKMLLEDPSHLGMI;MIDRRMGIYGYPIEIQALFFMALRCALPMLKHDAEGKELIERIVKRLHAL
HcINV28	5	motif3;motif4;motif5;motif10;motif14	YHMRSYFWLDFQQLNDIYRYKTEEYSHTAVNKFNVIPDSIPDWVFDFMPT;EGHEWRIVTGCDPKNTRWSYHNGGSWPVLLWLLTAACIKTGRPQIARRAI;MDFRWFALGNCIAILSSLATPEQSAAIMDLIEARWEELVGEMPLKIAYPA;RLLKDGWPEYYDGKLGRYIGKQARKYQTWSIAGYLVAKMLLEDPSHLGMI;MIDRRMGIYGYPIEIQALFFMALRCALPMLKHDAEGKELIERIVKRLHAL
HcINV29	10	motif1;motif2;motif6;motif7;motif8;motif9;motif11;motif12;motif13;motif15	DEVKKRRILWGWSGETDSREDDIAKGWASVQTIPR;PLAMVPDHWYDINGCWSGSATILPDNKPVILYTGIDN;AJLYRSKDFVNWTRAPGPLHSVNGTGMWECPDFYPVSTKGK;PNGPMYYKGWYHLFYQYNPBSAVW;RILVDHSIVESFAQGGRTCITSRVYPTEAIYNAARVFLFNNATEAVVIAK;EHRQVQNLAYPKBLSDPLLLEWVKPDYNPIJEPPPGI;LGPFGLLVLASKBLTEQTAVYFYVFKGPD;PDDPSPDVGIGLRYDYGKFYASKTFY;DKTGSNLJQWPIEEVESLRTKGKDFSBITLKTGSTVEJDVGDASQLDIEV;VKYVLKASLDDTRHDYYAJGTY
HcINV3	6	motif1;motif8;motif11;motif12;motif13;motif15	DEVKKRRILWGWSGETDSREDDIAKGWASVQTIPR;RILVDHSIVESFAQGGRTCITSRVYPTEAIYNAARVFLFNNATEAVVIAK;LGPFGLLVLASKBLTEQTAVYFYVFKGPD;PDDPSPDVGIGLRYDYGKFYASKTFY;DKTGSNLJQWPIEEVESLRTKGKDFSBITLKTGSTVEJDVGDASQLDIEV;VKYVLKASLDDTRHDYYAJGTY
HcINV30	10	motif1;motif2;motif6;motif7;motif8;motif9;motif11;motif12;motif13;motif15	DEVKKRRILWGWSGETDSREDDIAKGWASVQTIPR;PLAMVPDHWYDINGCWSGSATILPDNKPVILYTGIDN;AJLYRSKDFVNWTRAPGPLHSVNGTGMWECPDFYPVSTKGK;PNGPMYYKGWYHLFYQYNPBSAVW;RILVDHSIVESFAQGGRTCITSRVYPTEAIYNAARVFLFNNATEAVVIAK;EHRQVQNLAYPKBLSDPLLLEWVKPDYNPIJEPPPGI;LGPFGLLVLASKBLTEQTAVYFYVFKGPD;PDDPSPDVGIGLRYDYGKFYASKTFY;DKTGSNLJQWPIEEVESLRTKGKDFSBITLKTGSTVEJDVGDASQLDIEV;VKYVLKASLDDTRHDYYAJGTY
HcINV31	9	motif1;motif2;motif6;motif7;motif8;motif9;motif11;motif12;motif15	DEVKKRRILWGWSGETDSREDDIAKGWASVQTIPR;PLAMVPDHWYDINGCWSGSATILPDNKPVILYTGIDN;AJLYRSKDFVNWTRAPGPLHSVNGTGMWECPDFYPVSTKGK;PNGPMYYKGWYHLFYQYNPBSAVW;RILVDHSIVESFAQGGRTCITSRVYPTEAIYNAARVFLFNNATEAVVIAK;EHRQVQNLAYPKBLSDPLLLEWVKPDYNPIJEPPPGI;LGPFGLLVLASKBLTEQTAVYFYVFKGPD;PDDPSPDVGIGLRYDYGKFYASKTFY;VKYVLKASLDDTRHDYYAJGTY
HcINV32	8	motif1;motif2;motif6;motif7;motif9;motif11;motif12;motif15	DEVKKRRILWGWSGETDSREDDIAKGWASVQTIPR;PLAMVPDHWYDINGCWSGSATILPDNKPVILYTGIDN;AJLYRSKDFVNWTRAPGPLHSVNGTGMWECPDFYPVSTKGK;PNGPMYYKGWYHLFYQYNPBSAVW;EHRQVQNLAYPKBLSDPLLLEWVKPDYNPIJEPPPGI;LGPFGLLVLASKBLTEQTAVYFYVFKGPD;PDDPSPDVGIGLRYDYGKFYASKTFY;VKYVLKASLDDTRHDYYAJGTY
HcINV33	10	motif1;motif2;motif6;motif7;motif8;motif9;motif11;motif12;motif13;motif15	DEVKKRRILWGWSGETDSREDDIAKGWASVQTIPR;PLAMVPDHWYDINGCWSGSATILPDNKPVILYTGIDN;AJLYRSKDFVNWTRAPGPLHSVNGTGMWECPDFYPVSTKGK;PNGPMYYKGWYHLFYQYNPBSAVW;RILVDHSIVESFAQGGRTCITSRVYPTEAIYNAARVFLFNNATEAVVIAK;EHRQVQNLAYPKBLSDPLLLEWVKPDYNPIJEPPPGI;LGPFGLLVLASKBLTEQTAVYFYVFKGPD;PDDPSPDVGIGLRYDYGKFYASKTFY;DKTGSNLJQWPIEEVESLRTKGKDFSBITLKTGSTVEJDVGDASQLDIEV;VKYVLKASLDDTRHDYYAJGTY
HcINV34	5	motif3;motif4;motif5;motif10;motif14	YHMRSYFWLDFQQLNDIYRYKTEEYSHTAVNKFNVIPDSIPDWVFDFMPT;EGHEWRIVTGCDPKNTRWSYHNGGSWPVLLWLLTAACIKTGRPQIARRAI;MDFRWFALGNCIAILSSLATPEQSAAIMDLIEARWEELVGEMPLKIAYPA;RLLKDGWPEYYDGKLGRYIGKQARKYQTWSIAGYLVAKMLLEDPSHLGMI;MIDRRMGIYGYPIEIQALFFMALRCALPMLKHDAEGKELIERIVKRLHAL
HcINV35	5	motif3;motif4;motif5;motif10;motif14	YHMRSYFWLDFQQLNDIYRYKTEEYSHTAVNKFNVIPDSIPDWVFDFMPT;EGHEWRIVTGCDPKNTRWSYHNGGSWPVLLWLLTAACIKTGRPQIARRAI;MDFRWFALGNCIAILSSLATPEQSAAIMDLIEARWEELVGEMPLKIAYPA;RLLKDGWPEYYDGKLGRYIGKQARKYQTWSIAGYLVAKMLLEDPSHLGMI;MIDRRMGIYGYPIEIQALFFMALRCALPMLKHDAEGKELIERIVKRLHAL
HcINV4	9	motif1;motif2;motif7;motif8;motif9;motif11;motif12;motif13;motif15	DEVKKRRILWGWSGETDSREDDIAKGWASVQTIPR;PLAMVPDHWYDINGCWSGSATILPDNKPVILYTGIDN;PNGPMYYKGWYHLFYQYNPBSAVW;RILVDHSIVESFAQGGRTCITSRVYPTEAIYNAARVFLFNNATEAVVIAK;EHRQVQNLAYPKBLSDPLLLEWVKPDYNPIJEPPPGI;LGPFGLLVLASKBLTEQTAVYFYVFKGPD;PDDPSPDVGIGLRYDYGKFYASKTFY;DKTGSNLJQWPIEEVESLRTKGKDFSBITLKTGSTVEJDVGDASQLDIEV;VKYVLKASLDDTRHDYYAJGTY
HcINV5	5	motif1;motif6;motif12;motif13;motif15	DEVKKRRILWGWSGETDSREDDIAKGWASVQTIPR;AJLYRSKDFVNWTRAPGPLHSVNGTGMWECPDFYPVSTKGK;PDDPSPDVGIGLRYDYGKFYASKTFY;DKTGSNLJQWPIEEVESLRTKGKDFSBITLKTGSTVEJDVGDASQLDIEV;VKYVLKASLDDTRHDYYAJGTY
HcINV6	10	motif1;motif2;motif6;motif7;motif8;motif9;motif11;motif12;motif13;motif15	DEVKKRRILWGWSGETDSREDDIAKGWASVQTIPR;PLAMVPDHWYDINGCWSGSATILPDNKPVILYTGIDN;AJLYRSKDFVNWTRAPGPLHSVNGTGMWECPDFYPVSTKGK;PNGPMYYKGWYHLFYQYNPBSAVW;RILVDHSIVESFAQGGRTCITSRVYPTEAIYNAARVFLFNNATEAVVIAK;EHRQVQNLAYPKBLSDPLLLEWVKPDYNPIJEPPPGI;LGPFGLLVLASKBLTEQTAVYFYVFKGPD;PDDPSPDVGIGLRYDYGKFYASKTFY;DKTGSNLJQWPIEEVESLRTKGKDFSBITLKTGSTVEJDVGDASQLDIEV;VKYVLKASLDDTRHDYYAJGTY
HcINV7	10	motif1;motif2;motif6;motif7;motif8;motif9;motif11;motif12;motif13;motif15	DEVKKRRILWGWSGETDSREDDIAKGWASVQTIPR;PLAMVPDHWYDINGCWSGSATILPDNKPVILYTGIDN;AJLYRSKDFVNWTRAPGPLHSVNGTGMWECPDFYPVSTKGK;PNGPMYYKGWYHLFYQYNPBSAVW;RILVDHSIVESFAQGGRTCITSRVYPTEAIYNAARVFLFNNATEAVVIAK;EHRQVQNLAYPKBLSDPLLLEWVKPDYNPIJEPPPGI;LGPFGLLVLASKBLTEQTAVYFYVFKGPD;PDDPSPDVGIGLRYDYGKFYASKTFY;DKTGSNLJQWPIEEVESLRTKGKDFSBITLKTGSTVEJDVGDASQLDIEV;VKYVLKASLDDTRHDYYAJGTY
HcINV8	9	motif1;motif2;motif7;motif8;motif9;motif11;motif12;motif13;motif15	DEVKKRRILWGWSGETDSREDDIAKGWASVQTIPR;PLAMVPDHWYDINGCWSGSATILPDNKPVILYTGIDN;PNGPMYYKGWYHLFYQYNPBSAVW;RILVDHSIVESFAQGGRTCITSRVYPTEAIYNAARVFLFNNATEAVVIAK;EHRQVQNLAYPKBLSDPLLLEWVKPDYNPIJEPPPGI;LGPFGLLVLASKBLTEQTAVYFYVFKGPD;PDDPSPDVGIGLRYDYGKFYASKTFY;DKTGSNLJQWPIEEVESLRTKGKDFSBITLKTGSTVEJDVGDASQLDIEV;VKYVLKASLDDTRHDYYAJGTY
HcINV9	5	motif3;motif4;motif5;motif10;motif14	YHMRSYFWLDFQQLNDIYRYKTEEYSHTAVNKFNVIPDSIPDWVFDFMPT;EGHEWRIVTGCDPKNTRWSYHNGGSWPVLLWLLTAACIKTGRPQIARRAI;MDFRWFALGNCIAILSSLATPEQSAAIMDLIEARWEELVGEMPLKIAYPA;RLLKDGWPEYYDGKLGRYIGKQARKYQTWSIAGYLVAKMLLEDPSHLGMI;MIDRRMGIYGYPIEIQALFFMALRCALPMLKHDAEGKELIERIVKRLHAL
