# Supplementary material for: Genome-wide identification and characterization of the sucrose invertase gene family in Hemerocallis citrina
Source: PeerJ. 2024 Aug 29;12:e17999. doi: 10.7717/peerj.17999 (PMC11366234; doi:10.7717/peerj.17999)
Supplement: Supplemental Information 10 [file peerj-12-17999-s010.xlsx]

## Sheet: supplementary table 4 cis-eleme
Cis-element_name	Number of cis-elemenets	Functions of cis--elemenets
CAAT-box	1048	--
TATA-box	799	core promoter element around -30 of transcription start
Myb	193	--
ABRE	176	cis-acting element involved in the abscisic acid responsiveness
G-box	145	cis-acting regulatory element involved in light responsiveness
MYC	124	--
STRE	105	--
AT~TATA-box	101	--
Box 4	83	part of a conserved DNA module involved in light responsiveness
CGTCA-motif	62	cis-acting regulatory element involved in the MeJA-responsiveness
TGACG-motif	62	cis-acting regulatory element involved in the MeJA-responsiveness
as-1	62	--
ARE	60	cis-acting regulatory element essential for the anaerobic induction
WRE3	55	--
GT1-motif	43	light responsive element
ERE	40	--
MYB-like sequence	40	--
MBS	39	MYB binding site involved in drought-inducibility
AAGAA-motif	37	--
TGA-element	33	auxin-responsive element
A-box	32	cis-acting regulatory element
CCGTCC motif	32	--
CCGTCC-box	32	--
Myb-binding site	27	--
TCT-motif	27	part of a light responsive element
LTR	26	cis-acting element involved in low-temperature responsiveness
WUN-motif	26	--
TCA-element	24	cis-acting element involved in salicylic acid responsiveness
ABRE3a	22	--
ABRE4	22	--
CCAAT-box	19	MYBHv1 binding site
MYB recognition site	19	--
W box	19	--
CAT-box	18	cis-acting regulatory element related to meristem expression
GATA-motif	18	part of a light responsive element
O2-site	18	cis-acting regulatory element involved in zein metabolism regulation
TATA	18	--
TCA	18	--
DRE core	17	--
TC-rich repeats	17	cis-acting element involved in defense and stress responsiveness
I-box	15	part of a light responsive element
TATC-box	15	cis-acting element involved in gibberellin-responsiveness
Sp1	14	light responsive element
TCCC-motif	14	part of a light responsive element
GC-motif	12	enhancer-like element involved in anoxic specific inducibility
P-box	12	gibberellin-responsive element
AE-box	11	part of a module for light response
ATCT-motif	10	part of a conserved DNA module involved in light responsiveness
GARE-motif	8	gibberellin-responsive element
MRE	8	MYB binding site involved in light responsiveness
dOCT	8	--
ATC-motif	7	part of a conserved DNA module involved in light responsiveness
AuxRR-core	7	cis-acting regulatory element involved in auxin responsiveness
GCN4_motif	7	cis-regulatory element involved in endosperm expression
chs-CMA2a	6	part of a light responsive element
ACE	5	cis-acting element involved in light responsiveness
AT1-motif	5	part of a light responsive module
GA-motif	4	part of a light responsive element
circadian	4	cis-acting regulatory element involved in circadian control
AC-I	3	--
AT-rich sequence	3	element for maximal elicitor-mediated activation (2copies)
AuxRE	3	part of an auxin-responsive element
Box II	3	part of a light responsive element
CARE	3	--
DRE1	3	--
LAMP-element	3	part of a light responsive element
MSA-like	3	cis-acting element involved in cell cycle regulation
chs-CMA1a	3	part of a light responsive element
3-AF1 binding site	2	light responsive element
3-AF3 binding site	2	part of a conserved DNA module array (CMA3)
ACTCATCCT sequence	2	--
AT-rich element	2	binding site of AT-rich DNA binding protein (ATBP-1)
GTGGC-motif	2	part of a light responsive element
Gap-box	2	part of a light responsive element
HD-Zip 1	2	element involved in differentiation of the palisade mesophyll cells
MBSI	2	MYB binding site involved in flavonoid biosynthetic genes regulation
TGA-box	2	part of an auxin-responsive element
box S	2	--
chs-CMA2c	2	part of a light responsive element
ABRE2	1	--
CTAG-motif	1	--
E2Fb	1	--
F-box	1	--
HD-Zip 3	1	protein binding site
JERE	1	--
L-box	1	part of a light responsive element
OCT	1	--
SARE	1	cis-acting element involved in salicylic acid responsiveness
chs-Unit 1 m1	1	part of a light responsive element
re2f-1	1	--
