# Supplementary material for: Genome-wide identification and characterization of the sucrose invertase gene family in Hemerocallis citrina
Source: PeerJ. 2024 Aug 29;12:e17999. doi: 10.7717/peerj.17999 (PMC11366234; doi:10.7717/peerj.17999)
Supplement: Supplemental Information 11 [file peerj-12-17999-s011.xlsx]

## Sheet: KaKs_Stat
Sequence	Method	Ka	Ks	Ka/Ks	P-Value(Fisher)	Length
HcINV1-HcINV23	MA	0.982371	1.05965	0.927068	0.0804503	1422
HcINV13-HcINV6	MA	0.977878	1.07547	0.909257	0.014396	1668
HcINV15-HcINV28	MA	0.973432	1.09902	0.88573	0.00684932	1344
HcINV15-HcINV35	MA	0.97334	1.09914	0.885548	0.00677472	1344
HcINV13-HcINV8	MA	0.967306	1.11527	0.867329	0.000137478	1725
HcINV15-HcINV23	MA	0.96812	1.11744	0.866377	0.000231712	1656
HcINV10-HcINV27	MA	0.968935	1.11908	0.865828	0.000519435	1566
HcINV20-HcINV27	MA	0.966548	1.11759	0.86485	3.11111e-05	1758
HcINV25-HcINV27	MA	0.964706	1.11911	0.862029	6.90591e-05	1776
HcINV14-HcINV35	MA	0.968337	1.12419	0.861361	0.000852042	1347
HcINV1-HcINV27	MA	0.964586	1.12261	0.859233	0.000465611	1413
HcINV14-HcINV28	MA	0.967284	1.12868	0.857006	0.000510857	1347
HcINV16-HcINV35	MA	0.965916	1.12964	0.855068	0.000708366	1347
HcINV15-HcINV21	MA	0.963254	1.13395	0.849466	1.72224e-05	1632
HcINV2-HcINV27	MA	0.961096	1.13275	0.848464	3.59276e-06	1764
HcINV12-HcINV6	MA	0.961719	1.13475	0.847519	1.61668e-05	1596
HcINV29-HcINV9	MA	0.962068	1.13775	0.845586	8.77178e-07	1782
HcINV34-HcINV6	MA	0.960517	1.13933	0.843056	6.38527e-06	1596
HcINV25-HcINV9	MA	0.960496	1.14391	0.839663	5.57467e-07	1875
HcINV22-HcINV27	MA	0.960024	1.1439	0.839254	9.19557e-07	1692
HcINV13-HcINV15	MA	0.95932	1.14392	0.838622	4.44393e-06	1653
HcINV21-HcINV8	MA	0.959123	1.14729	0.83599	4.13406e-06	1644
HcINV12-HcINV7	MA	0.95793	1.14682	0.835292	1.53988e-07	1608
HcINV27-HcINV30	MA	0.958649	1.14917	0.834207	3.16825e-07	1692
HcINV26-HcINV9	MA	0.957809	1.1538	0.830134	2.46087e-08	1902
HcINV21-HcINV22	MA	0.957889	1.1539	0.83013	6.45795e-07	1632
HcINV13-HcINV25	MA	0.954987	1.15206	0.828942	6.29754e-07	1716
HcINV19-HcINV7	MA	0.957007	1.15569	0.828084	1.03849e-05	1305
HcINV16-HcINV28	MA	0.956613	1.16285	0.822644	1.73502e-05	1347
HcINV13-HcINV7	MA	0.954677	1.16091	0.822354	2.06353e-08	1620
HcINV13-HcINV17	MA	0.953764	1.163	0.820086	5.3023e-08	1701
HcINV34-HcINV7	MA	0.952897	1.16444	0.818328	1.77574e-09	1608
HcINV27-HcINV6	MA	0.954328	1.16655	0.818076	6.91504e-08	1677
HcINV4-HcINV9	MA	0.95403	1.16901	0.816098	4.73367e-09	1863
HcINV27-HcINV7	MA	0.953153	1.16821	0.815906	9.51946e-08	1644
HcINV21-HcINV6	MA	0.953558	1.16872	0.815902	6.21239e-08	1629
HcINV10-HcINV12	MA	0.954356	1.1699	0.815759	2.78032e-07	1551
HcINV10-HcINV35	MA	0.954854	1.1717	0.814934	2.10189e-06	1338
HcINV24-HcINV26	MA	0.950926	1.16955	0.813068	0.000301368	780
HcINV23-HcINV29	MA	0.952689	1.17213	0.812782	8.08693e-09	1707
HcINV13-HcINV3	MA	0.950643	1.16989	0.81259	2.1039e-08	1698
HcINV19-HcINV3	MA	0.95441	1.17743	0.810587	7.93236e-06	1305
HcINV10-HcINV23	MA	0.954181	1.1773	0.810485	6.89175e-08	1566
HcINV15-HcINV34	MA	0.949877	1.17464	0.808655	6.15934e-09	1608
HcINV12-HcINV15	MA	0.949894	1.17485	0.808521	3.71109e-09	1611
HcINV8-HcINV9	MA	0.951081	1.18167	0.80486	1.78154e-09	1833
HcINV16-HcINV27	MA	0.950597	1.18148	0.804585	2.63865e-09	1647
HcINV29-HcINV32	MA	0.189763	0.236339	0.802925	0.0956725	1503
HcINV23-HcINV6	MA	0.9484	1.18161	0.802632	8.61668e-10	1683
HcINV12-HcINV4	MA	0.947386	1.18706	0.798092	5.66991e-10	1629
HcINV10-HcINV34	MA	0.948565	1.1909	0.796511	5.91241e-09	1551
HcINV1-HcINV13	MA	0.944653	1.1885	0.794825	5.01424e-08	1416
HcINV32-HcINV9	MA	0.948388	1.19353	0.794605	9.4863e-09	1515
HcINV16-HcINV23	MA	0.948619	1.19488	0.793904	8.11422e-11	1638
HcINV13-HcINV29	MA	0.944612	1.1914	0.792861	6.92279e-11	1674
HcINV1-HcINV24	MA	0.947551	1.19617	0.792156	0.00018109	780
HcINV3-HcINV9	MA	0.946386	1.19548	0.791637	2.51453e-11	1881
HcINV17-HcINV21	MA	0.948446	1.19878	0.791178	3.35215e-11	1659
HcINV21-HcINV33	MA	0.948475	1.19937	0.790812	4.9709e-10	1632
HcINV19-HcINV30	MA	0.945855	1.19803	0.789508	3.3679e-08	1299
HcINV13-HcINV4	MA	0.943337	1.19631	0.788541	9.94544e-12	1725
HcINV21-HcINV4	MA	0.946387	1.20045	0.788359	6.08386e-11	1665
HcINV34-HcINV4	MA	0.944127	1.19888	0.787511	4.14739e-11	1629
HcINV23-HcINV8	MA	0.944848	1.20017	0.787259	1.53297e-10	1719
HcINV17-HcINV23	MA	0.948057	1.20431	0.787217	1.71949e-10	1725
HcINV27-HcINV8	MA	0.94396	1.20022	0.786488	1.97984e-11	1767
HcINV19-HcINV29	MA	0.943443	1.19974	0.786374	2.21089e-09	1302
HcINV10-HcINV28	MA	0.946899	1.20564	0.785389	2.81761e-08	1338
HcINV14-HcINV23	MA	0.945763	1.20427	0.785339	3.11443e-10	1542
HcINV7-HcINV9	MA	0.943176	1.20476	0.782871	9.75943e-11	1644
HcINV1-HcINV19	MA	0.943155	1.20599	0.782058	3.4702e-10	1293
HcINV27-HcINV33	MA	0.944339	1.20988	0.780524	8.75463e-15	1713
HcINV24-HcINV5	MA	0.942936	1.20901	0.779924	4.95384e-05	732
HcINV3-HcINV34	MA	0.939818	1.20739	0.778391	4.0627e-11	1629
HcINV19-HcINV22	MA	0.943141	1.21391	0.776946	1.83044e-09	1302
HcINV30-HcINV9	MA	0.94181	1.21353	0.776089	1.72544e-12	1725
HcINV3-HcINV4	MA	0.664211	0.856114	0.775844	2.03936e-05	1863
HcINV20-HcINV9	MA	0.941658	1.21981	0.771969	4.99633e-15	1845
HcINV27-HcINV3	MA	0.938611	1.21637	0.771647	1.47101e-13	1770
HcINV22-HcINV9	MA	0.94041	1.21935	0.771239	6.87172e-13	1725
HcINV12-HcINV8	MA	0.937118	1.2161	0.770591	3.75785e-13	1623
HcINV12-HcINV3	MA	0.936846	1.21719	0.769681	4.67689e-12	1629
HcINV12-HcINV33	MA	0.938246	1.21926	0.769518	1.4356e-12	1617
HcINV21-HcINV29	MA	0.940733	1.22305	0.769169	1.50854e-12	1641
HcINV15-HcINV9	MA	0.939993	1.22304	0.768569	2.38891e-14	1686
HcINV33-HcINV9	MA	0.941449	1.22561	0.768147	6.67577e-14	1722
HcINV10-HcINV21	MA	0.941078	1.22654	0.767265	5.17843e-11	1524
HcINV21-HcINV31	MA	0.939007	1.22456	0.766814	1.00977e-12	1623
HcINV33-HcINV34	MA	0.937334	1.22257	0.766693	9.04593e-13	1617
HcINV34-HcINV8	MA	0.935525	1.22228	0.765391	5.14094e-14	1623
HcINV23-HcINV3	MA	0.935017	1.22202	0.765143	1.61299e-15	1728
HcINV10-HcINV13	MA	0.937591	1.22647	0.764465	3.54987e-13	1572
HcINV16-HcINV21	MA	0.940266	1.23144	0.763547	1.18034e-12	1593
HcINV31-HcINV9	MA	0.939291	1.23051	0.763337	3.87627e-13	1671
HcINV23-HcINV4	MA	0.937978	1.22943	0.762938	2.50032e-14	1722
HcINV28-HcINV32	MA	0.938014	1.22971	0.762795	4.96831e-12	1332
HcINV11-HcINV19	MA	0.940196	1.23377	0.762051	6.093e-11	1293
HcINV12-HcINV22	MA	0.936259	1.22874	0.761969	4.53632e-12	1593
HcINV28-HcINV6	MA	0.938093	1.23161	0.761682	4.36213e-10	1341
HcINV12-HcINV30	MA	0.936292	1.23017	0.761108	2.50861e-12	1593
HcINV15-HcINV27	MA	0.933879	1.23358	0.757049	1.6501e-15	1686
HcINV12-HcINV29	MA	0.933269	1.23306	0.756874	1.34413e-14	1626
HcINV22-HcINV34	MA	0.934528	1.23534	0.756497	6.94459e-13	1593
HcINV13-HcINV30	MA	0.933385	1.23463	0.756003	2.86328e-16	1674
HcINV21-HcINV3	MA	0.932729	1.23503	0.755228	1.19557e-15	1656
HcINV27-HcINV4	MA	0.935238	1.23956	0.754492	5.84744e-16	1770
HcINV13-HcINV22	MA	0.932255	1.23834	0.75283	8.08091e-17	1674
HcINV17-HcINV9	MA	0.942221	1.25223	0.752435	1.83979e-15	1782
HcINV2-HcINV24	MA	0.933082	1.2408	0.752	2.66999e-06	780
HcINV13-HcINV16	MA	0.93158	1.23887	0.751959	1.46635e-14	1614
HcINV30-HcINV34	MA	0.93304	1.24188	0.751315	1.31333e-13	1593
HcINV17-HcINV34	MA	0.933156	1.2434	0.75049	3.30158e-15	1620
HcINV13-HcINV14	MA	0.934055	1.24663	0.749262	1.05417e-15	1569
HcINV32-HcINV35	MA	0.933421	1.24617	0.749033	1.10222e-13	1332
HcINV35-HcINV6	MA	0.934009	1.24754	0.748679	2.53011e-11	1341
HcINV14-HcINV27	MA	0.93264	1.24851	0.747003	2.64476e-14	1569
HcINV12-HcINV32	MA	0.930691	1.24596	0.746969	2.72779e-16	1503
HcINV27-HcINV31	MA	0.931864	1.24762	0.746915	2.71452e-14	1662
HcINV21-HcINV7	MA	0.930477	1.2473	0.745992	3.25154e-20	1629
HcINV32-HcINV34	MA	0.929973	1.24779	0.745298	2.66023e-16	1503
HcINV27-HcINV29	MA	0.929983	1.24811	0.74511	2.18862e-17	1707
HcINV12-HcINV25	MA	0.928783	1.24881	0.743736	6.55431e-15	1614
HcINV2-HcINV23	MA	0.929645	1.25127	0.742961	1.91598e-15	1701
HcINV28-HcINV29	MA	0.929783	1.25203	0.74262	4.20042e-14	1344
HcINV23-HcINV7	MA	0.928609	1.25406	0.740483	6.62606e-19	1620
HcINV14-HcINV21	MA	0.932197	1.25979	0.739963	6.24829e-17	1566
HcINV14-HcINV9	MA	0.932809	1.26062	0.739958	3.45135e-14	1551
HcINV10-HcINV19	MA	0.933378	1.26223	0.739467	1.25072e-12	1305
HcINV28-HcINV8	MA	0.931592	1.26132	0.738585	1.07835e-12	1344
HcINV29-HcINV35	MA	0.928033	1.25786	0.737788	5.1001e-15	1338
HcINV26-HcINV27	MA	0.92547	1.25534	0.737228	1.66978e-17	1755
HcINV28-HcINV7	MA	0.928478	1.26015	0.736797	5.06979e-15	1347
HcINV23-HcINV26	MA	0.924504	1.25504	0.736631	2.88697e-17	1716
HcINV2-HcINV34	MA	0.925354	1.25722	0.736029	5.15225e-17	1626
HcINV16-HcINV9	MA	0.932546	1.26753	0.735721	3.12142e-17	1668
HcINV19-HcINV32	MA	0.927864	1.26234	0.735032	8.28488e-15	1293
HcINV2-HcINV21	MA	0.926752	1.26371	0.733359	5.32847e-16	1656
HcINV21-HcINV30	MA	0.928247	1.26598	0.733222	4.83939e-17	1602
HcINV25-HcINV34	MA	0.925306	1.26238	0.732988	1.99503e-16	1614
HcINV35-HcINV8	MA	0.929339	1.26929	0.732174	6.68998e-14	1344
HcINV2-HcINV9	MA	0.926307	1.26858	0.730193	7.26644e-24	1863
HcINV20-HcINV23	MA	0.92594	1.26844	0.729982	2.22004e-20	1722
HcINV10-HcINV9	MA	0.928854	1.27634	0.727747	5.252e-18	1578
HcINV12-HcINV2	MA	0.922055	1.26811	0.727109	2.91116e-18	1626
HcINV35-HcINV7	MA	0.925173	1.2724	0.727107	2.2157e-16	1347
HcINV13-HcINV2	MA	0.922274	1.27237	0.724848	1.95659e-20	1719
HcINV21-HcINV26	MA	0.92196	1.27301	0.724234	2.61192e-19	1662
HcINV17-HcINV27	MA	0.926816	1.28	0.724073	4.05474e-21	1731
HcINV13-HcINV33	MA	0.92358	1.27578	0.723935	6.12573e-21	1668
HcINV29-HcINV34	MA	0.922624	1.27784	0.722021	5.70508e-20	1611
HcINV19-HcINV2	MA	0.922089	1.27914	0.720868	4.60506e-14	1305
HcINV1-HcINV34	MA	0.917372	1.27389	0.720134	1.85529e-18	1404
HcINV23-HcINV25	MA	0.920817	1.27895	0.719981	1.72268e-20	1722
HcINV12-HcINV16	MA	0.92403	1.28355	0.719905	2.71455e-21	1599
HcINV31-HcINV35	MA	0.922425	1.28198	0.71953	6.78088e-16	1341
HcINV11-HcINV28	MA	0.924614	1.28618	0.718884	6.98075e-17	1326
HcINV16-HcINV34	MA	0.923651	1.28543	0.718552	1.1737e-21	1599
HcINV12-HcINV17	MA	0.921509	1.28327	0.718095	5.5684e-20	1620
HcINV1-HcINV12	MA	0.91615	1.27689	0.717484	9.50736e-19	1404
HcINV6-HcINV9	MA	0.923033	1.28987	0.715602	1.25004e-22	1710
HcINV20-HcINV28	MA	0.920722	1.29019	0.713634	5.73342e-16	1347
HcINV24-HcINV25	MA	0.91624	1.28446	0.713327	2.94797e-10	780
HcINV19-HcINV26	MA	0.92038	1.29052	0.713188	1.07746e-16	1305
HcINV23-HcINV30	MA	0.921126	1.29302	0.712383	5.37659e-22	1659
HcINV11-HcINV21	MA	0.924859	1.2986	0.712195	8.81794e-17	1434
HcINV22-HcINV23	MA	0.92094	1.29339	0.712035	6.51037e-22	1659
HcINV22-HcINV35	MA	0.919427	1.29539	0.709767	8.90993e-18	1338
HcINV22-HcINV24	MA	0.922707	1.3008	0.70934	1.18853e-10	780
HcINV28-HcINV31	MA	0.919048	1.29572	0.709297	2.92256e-17	1341
HcINV13-HcINV32	MA	0.919568	1.29661	0.709211	5.64137e-20	1506
HcINV17-HcINV3	MA	0.918105	1.29806	0.707288	1.02493e-23	1821
HcINV11-HcINV35	MA	0.920746	1.30186	0.707256	5.01279e-19	1326
HcINV20-HcINV35	MA	0.917608	1.29918	0.706299	1.35141e-17	1347
HcINV14-HcINV19	MA	0.920498	1.30522	0.705241	1.53236e-17	1299
HcINV13-HcINV20	MA	0.913771	1.29673	0.70467	8.14449e-26	1725
HcINV11-HcINV27	MA	0.917571	1.30236	0.704547	8.49649e-19	1437
HcINV30-HcINV35	MA	0.917816	1.30297	0.704402	2.52658e-18	1338
HcINV22-HcINV28	MA	0.917759	1.30292	0.704385	4.86011e-18	1338
HcINV3-HcINV8	MA	0.682572	0.97154	0.702567	5.30241e-10	1878
HcINV11-HcINV24	MA	0.922477	1.31505	0.701476	1.19874e-09	780
HcINV26-HcINV35	MA	0.914653	1.30817	0.699185	4.5488e-19	1347
HcINV21-HcINV25	MA	0.913207	1.31045	0.696868	6.5369e-25	1653
HcINV23-HcINV31	MA	0.916471	1.31814	0.695275	5.12972e-28	1680
HcINV20-HcINV21	MA	0.914509	1.31559	0.695134	1.74753e-25	1656
HcINV24-HcINV33	MA	0.907711	1.30852	0.693694	3.84628e-13	780
HcINV14-HcINV34	MA	0.915481	1.31982	0.693643	1.0113e-24	1527
HcINV28-HcINV3	MA	0.911077	1.31351	0.693621	2.09203e-20	1341
HcINV19-HcINV25	MA	0.910287	1.31277	0.693412	1.25545e-19	1305
HcINV12-HcINV14	MA	0.914465	1.32253	0.691453	7.52699e-26	1527
HcINV28-HcINV30	MA	0.9128	1.32274	0.690082	1.92717e-20	1338
HcINV1-HcINV21	MA	0.908011	1.31689	0.689513	2.69366e-24	1413
HcINV11-HcINV13	MA	0.91389	1.32721	0.688579	4.44898e-22	1437
HcINV1-HcINV35	MA	0.909815	1.32179	0.688322	6.50373e-24	1329
HcINV24-HcINV29	MA	0.913676	1.3348	0.684503	9.41607e-12	780
HcINV1-HcINV28	MA	0.908518	1.32747	0.684398	4.60448e-25	1329
HcINV11-HcINV9	MA	0.912387	1.33448	0.683701	3.49184e-20	1434
HcINV13-HcINV26	MA	0.905331	1.32507	0.683234	4.97682e-29	1719
HcINV3-HcINV35	MA	0.905731	1.33197	0.679992	6.44361e-23	1341
HcINV26-HcINV34	MA	0.904085	1.3296	0.67997	4.50879e-27	1626
HcINV2-HcINV28	MA	0.907242	1.33806	0.678027	1.11417e-22	1341
HcINV19-HcINV33	MA	0.906938	1.34108	0.676274	3.35157e-23	1305
HcINV19-HcINV8	MA	0.904793	1.34021	0.675112	1.17231e-21	1305
HcINV13-HcINV31	MA	0.906524	1.34337	0.674815	1.74057e-27	1611
HcINV12-HcINV26	MA	0.900729	1.33997	0.672198	4.69661e-29	1626
HcINV19-HcINV4	MA	0.903204	1.34654	0.670757	3.07858e-23	1305
HcINV2-HcINV35	MA	0.904641	1.34882	0.670691	1.81636e-24	1341
HcINV19-HcINV31	MA	0.909501	1.35615	0.670651	1.66686e-22	1305
HcINV1-HcINV3	MA	0.904962	1.35026	0.670212	2.7592e-21	1377
HcINV31-HcINV34	MA	0.903159	1.34782	0.670089	2.60884e-28	1578
HcINV17-HcINV24	MA	0.911817	1.36374	0.668615	6.54872e-12	780
HcINV17-HcINV35	MA	0.906745	1.35876	0.667335	1.08985e-26	1347
HcINV21-HcINV32	MA	0.904547	1.35712	0.666521	1.17863e-32	1488
HcINV28-HcINV33	MA	0.907378	1.36354	0.665457	9.37017e-27	1341
HcINV33-HcINV35	MA	0.906412	1.36453	0.664267	4.51814e-27	1341
HcINV17-HcINV28	MA	0.905769	1.3636	0.664246	5.60096e-27	1347
HcINV27-HcINV32	MA	0.902295	1.36028	0.663314	2.05096e-27	1509
HcINV11-HcINV12	MA	0.902303	1.36437	0.661332	2.85274e-27	1407
HcINV26-HcINV28	MA	0.899489	1.36152	0.660651	8.00403e-27	1347
HcINV12-HcINV31	MA	0.899156	1.36167	0.660336	8.6637e-31	1578
HcINV20-HcINV34	MA	0.896926	1.35984	0.659582	3.60078e-34	1623
HcINV11-HcINV34	MA	0.901803	1.3683	0.659067	4.34748e-28	1407
HcINV12-HcINV20	MA	0.896078	1.36269	0.657582	6.6285e-35	1623
HcINV23-HcINV33	MA	0.901122	1.38236	0.651872	1.85992e-40	1638
HcINV23-HcINV32	MA	0.896875	1.37731	0.65118	7.04789e-34	1518
HcINV25-HcINV28	MA	0.896638	1.37836	0.65051	4.84532e-27	1341
HcINV11-HcINV23	MA	0.897502	1.38507	0.647981	4.34817e-32	1440
HcINV25-HcINV35	MA	0.892981	1.39043	0.642232	2.11304e-29	1341
HcINV1-HcINV9	MA	0.890494	1.39588	0.637944	3.75028e-41	1422
HcINV19-HcINV6	MA	0.889778	1.40233	0.634499	1.70937e-31	1296
HcINV15-HcINV19	MA	0.896719	1.41475	0.633838	5.15512e-33	1296
HcINV24-HcINV6	MA	0.883367	1.39477	0.633344	5.5956e-21	780
HcINV11-HcINV3	MA	0.888714	1.42224	0.62487	1.64202e-31	1422
HcINV19-HcINV20	MA	0.886596	1.41897	0.624819	1.87744e-36	1305
HcINV29-HcINV3	MA	0.885854	1.41818	0.624643	6.2671e-39	1731
HcINV24-HcINV31	MA	0.884401	1.42037	0.622653	3.4721e-21	777
HcINV14-HcINV24	MA	0.887325	1.43025	0.620397	1.17358e-19	780
HcINV10-HcINV24	MA	0.893591	1.44572	0.618095	3.71026e-19	780
HcINV24-HcINV32	MA	0.875985	1.42196	0.616039	6.54427e-23	780
HcINV28-HcINV4	MA	0.884503	1.44065	0.613961	1.25513e-40	1347
HcINV24-HcINV8	MA	0.880411	1.43424	0.613852	1.31907e-20	780
HcINV15-HcINV24	MA	0.880732	1.44023	0.611521	4.77958e-23	780
HcINV15-HcINV3	MA	0.873839	1.43792	0.60771	8.8241e-37	1677
HcINV23-HcINV5	MA	0.875759	1.4414	0.607575	1.24606e-24	843
HcINV14-HcINV3	MA	0.881077	1.45192	0.606835	5.00181e-33	1557
HcINV24-HcINV7	MA	0.881504	1.45481	0.605925	2.11204e-32	780
HcINV35-HcINV4	MA	0.879389	1.46009	0.602285	3.54429e-47	1347
HcINV13-HcINV24	MA	0.132685	0.223966	0.592433	0.00954871	777
HcINV16-HcINV24	MA	0.872368	1.47704	0.59062	3.79032e-27	780
HcINV17-HcINV26	MA	0.869117	1.48759	0.584245	1.05951e-39	1590
HcINV17-HcINV19	MA	0.874542	1.4987	0.583533	1.11027e-35	1305
HcINV24-HcINV3	MA	0.862677	1.47971	0.583004	2.70547e-28	777
HcINV20-HcINV24	MA	0.860818	1.48597	0.579296	1.03616e-30	777
HcINV17-HcINV8	MA	0.865822	1.49677	0.57846	1.00103e-46	1605
HcINV10-HcINV3	MA	0.865875	1.49887	0.577685	3.01954e-42	1554
HcINV22-HcINV3	MA	0.867765	1.50418	0.576904	1.44926e-51	1716
HcINV24-HcINV30	MA	0.865853	1.50973	0.573513	4.14117e-39	780
HcINV3-HcINV32	MA	0.859851	1.50072	0.572961	6.52598e-59	1515
HcINV3-HcINV31	MA	0.858637	1.50386	0.570955	7.99585e-54	1695
HcINV17-HcINV7	MA	0.858716	1.52612	0.562678	1.63384e-49	1581
HcINV1-HcINV17	MA	0.849638	1.51358	0.561343	4.45814e-48	1398
HcINV16-HcINV19	MA	0.862705	1.54013	0.560153	5.14893e-71	1290
HcINV3-HcINV30	MA	0.859289	1.54148	0.557445	1.73527e-58	1704
HcINV17-HcINV6	MA	0.838339	1.51277	0.554173	2.88983e-48	1593
HcINV17-HcINV4	MA	0.853953	1.5538	0.549591	3.91336e-55	1605
HcINV2-HcINV3	MA	0.839223	1.53282	0.547503	1.97197e-47	1893
HcINV17-HcINV20	MA	0.844285	1.55674	0.542343	6.00186e-58	1566
HcINV24-HcINV4	MA	0.846709	1.56938	0.539518	6.06326e-41	780
HcINV16-HcINV3	MA	0.836433	1.60186	0.522164	3.66456e-73	1653
HcINV26-HcINV3	MA	0.80198	1.65409	0.484847	8.63038e-88	1941
HcINV17-HcINV25	MA	0.797614	1.71498	0.465086	1.66884e-89	1509
HcINV25-HcINV3	MA	0.777749	1.76227	0.441333	1.62142e-96	1893
HcINV20-HcINV3	MA	0.771736	1.75639	0.439389	2.90111e-105	1812
HcINV17-HcINV2	MA	0.775726	1.79295	0.432653	5.46495e-131	1506
HcINV17-HcINV33	MA	0.766705	1.81698	0.421966	2.04039e-128	1500
HcINV1-HcINV2	MA	0.0413646	0.107379	0.38522	2.31865e-05	1422
HcINV3-HcINV33	MA	0.730225	1.89616	0.385107	2.23299e-154	1710
HcINV1-HcINV29	MA	0.705553	1.94787	0.362218	0	1299
HcINV3-HcINV6	MA	0.712145	1.96942	0.361602	4.04145e-135	1662
HcINV2-HcINV29	MA	0.703275	1.95849	0.35909	0	1779
HcINV26-HcINV29	MA	0.699759	1.98481	0.352558	0	1770
HcINV3-HcINV7	MA	0.686996	2.05213	0.334773	0	1644
HcINV29-HcINV4	MA	0.698482	2.09209	0.333868	0	1773
HcINV17-HcINV5	MA	0.676556	2.02814	0.333584	0	789
HcINV29-HcINV8	MA	0.690218	2.07176	0.333155	0	1773
HcINV16-HcINV7	MA	0.67091	2.10075	0.319368	0	1524
HcINV25-HcINV29	MA	0.675245	2.11863	0.318718	0	1773
HcINV15-HcINV7	MA	0.663886	2.13295	0.311252	0	1533
HcINV15-HcINV6	MA	0.658841	2.13074	0.309207	0	1533
HcINV29-HcINV30	MA	0.138852	0.456568	0.304121	1.82179e-29	1728
HcINV16-HcINV6	MA	0.654696	2.15643	0.303602	0	1527
HcINV22-HcINV29	MA	0.137762	0.454749	0.302941	5.21587e-30	1728
HcINV20-HcINV29	MA	0.653099	2.1637	0.301844	0	1773
HcINV32-HcINV8	MA	0.660999	2.19117	0.301665	0	1518
HcINV29-HcINV7	MA	0.658713	2.20711	0.298451	0	1584
HcINV24-HcINV34	MA	0.134181	0.466006	0.287939	9.99181e-15	777
HcINV32-HcINV4	MA	0.653624	2.27109	0.287801	0	1512
HcINV10-HcINV7	MA	0.64107	2.22989	0.28749	0	1527
HcINV12-HcINV24	MA	0.133378	0.470945	0.283214	1.89971e-15	777
HcINV29-HcINV33	MA	0.636621	2.24958	0.282996	0	1701
HcINV32-HcINV7	MA	0.637513	2.26183	0.281858	0	1377
HcINV31-HcINV6	MA	0.629646	2.23901	0.281216	0	1545
HcINV6-HcINV7	MA	0.0467927	0.166731	0.280648	8.16684e-12	1647
HcINV29-HcINV6	MA	0.638472	2.27784	0.280297	0	1584
HcINV15-HcINV8	MA	0.625984	2.26907	0.275877	0	1674
HcINV31-HcINV7	MA	0.624186	2.28184	0.273545	0	1545
HcINV2-HcINV32	MA	0.620308	2.27065	0.273185	0	1518
HcINV16-HcINV25	MA	0.626369	2.29699	0.272691	0	1650
HcINV10-HcINV15	MA	0.146666	0.544392	0.269412	3.91717e-36	1572
HcINV10-HcINV6	MA	0.618052	2.3097	0.26759	0	1527
HcINV23-HcINV9	MA	0.640753	2.40344	0.266598	0	1470
HcINV16-HcINV26	MA	0.613256	2.30174	0.266432	0	1644
HcINV32-HcINV6	MA	0.620979	2.3391	0.265478	0	1377
HcINV16-HcINV2	MA	0.625536	2.35695	0.2654	0	1653
HcINV23-HcINV27	MA	0.628918	2.38235	0.263991	0	1470
HcINV16-HcINV33	MA	0.611621	2.32888	0.262625	0	1647
HcINV10-HcINV25	MA	0.610479	2.32878	0.262145	0	1548
HcINV1-HcINV16	MA	0.62092	2.38111	0.260769	0	1179
HcINV15-HcINV2	MA	0.60919	2.34134	0.260188	0	1674
HcINV22-HcINV7	MA	0.614354	2.36734	0.259512	0	1584
HcINV25-HcINV31	MA	0.604862	2.34182	0.258287	0	1689
HcINV2-HcINV31	MA	0.605058	2.34682	0.257821	0	1692
HcINV15-HcINV25	MA	0.59945	2.33051	0.257219	0	1671
HcINV15-HcINV26	MA	0.596457	2.32539	0.256498	0	1668
HcINV15-HcINV4	MA	0.603195	2.35203	0.256458	0	1671
HcINV10-HcINV4	MA	0.606184	2.36404	0.256418	0	1551
HcINV31-HcINV8	MA	0.60317	2.35323	0.256316	0	1689
HcINV30-HcINV32	MA	0.0998481	0.389825	0.256136	1.741e-26	1503
HcINV31-HcINV4	MA	0.606916	2.37403	0.255648	0	1689
HcINV22-HcINV32	MA	0.101933	0.39946	0.255178	1.96498e-27	1503
HcINV16-HcINV4	MA	0.605231	2.3785	0.254459	0	1653
HcINV15-HcINV16	MA	0.162818	0.640184	0.254331	9.04286e-48	1677
HcINV16-HcINV8	MA	0.60388	2.38546	0.25315	0	1653
HcINV30-HcINV7	MA	0.605469	2.39425	0.252885	0	1584
HcINV22-HcINV8	MA	0.600889	2.37967	0.25251	0	1716
HcINV26-HcINV32	MA	0.595471	2.36778	0.25149	0	1515
HcINV30-HcINV8	MA	0.597346	2.38624	0.250329	0	1716
HcINV11-HcINV14	MA	0.0618057	0.25021	0.247015	1.48208e-15	1278
HcINV14-HcINV7	MA	0.59761	2.42056	0.246889	0	1533
HcINV11-HcINV7	MA	0.608955	2.47877	0.245668	0	1329
HcINV10-HcINV8	MA	0.588465	2.41019	0.244157	0	1551
HcINV1-HcINV31	MA	0.589059	2.42119	0.243294	0	1218
HcINV10-HcINV26	MA	0.583989	2.41665	0.241652	0	1542
HcINV2-HcINV22	MA	0.59179	2.45098	0.241451	0	1722
HcINV25-HcINV32	MA	0.591895	2.45313	0.241282	0	1515
HcINV22-HcINV6	MA	0.591329	2.45157	0.241204	0	1584
HcINV22-HcINV4	MA	0.592811	2.47121	0.239887	0	1716
HcINV15-HcINV33	MA	0.577962	2.42793	0.238047	0	1653
HcINV30-HcINV4	MA	0.589624	2.49119	0.236684	0	1716
HcINV2-HcINV30	MA	0.585727	2.47548	0.236612	0	1722
HcINV14-HcINV4	MA	0.590041	2.50107	0.235915	0	1542
HcINV10-HcINV20	MA	0.578735	2.45479	0.235758	0	1566
HcINV10-HcINV33	MA	0.569425	2.41725	0.235567	0	1548
HcINV30-HcINV6	MA	0.58278	2.47542	0.235426	0	1584
HcINV14-HcINV8	MA	0.586764	2.49752	0.234939	0	1542
HcINV22-HcINV26	MA	0.575213	2.4599	0.233836	0	1713
HcINV1-HcINV5	MA	0.339072	1.45588	0.232899	1.29226e-59	819
HcINV26-HcINV31	MA	0.570125	2.4506	0.232647	0	1689
HcINV16-HcINV20	MA	0.574145	2.47419	0.232054	0	1665
HcINV1-HcINV15	MA	0.571384	2.46458	0.231839	0	1200
HcINV26-HcINV30	MA	0.572032	2.46822	0.231759	0	1713
HcINV11-HcINV33	MA	0.569757	2.46522	0.231118	0	1422
HcINV10-HcINV16	MA	0.0984268	0.429253	0.229298	1.37145e-33	1572
HcINV10-HcINV2	MA	0.57676	2.51797	0.229057	0	1545
HcINV14-HcINV6	MA	0.574818	2.51127	0.228895	0	1533
HcINV15-HcINV20	MA	0.566801	2.47627	0.228893	0	1686
HcINV25-HcINV30	MA	0.568907	2.4983	0.227717	0	1716
HcINV11-HcINV8	MA	0.580658	2.55574	0.227197	0	1422
HcINV11-HcINV26	MA	0.566336	2.49482	0.227004	0	1410
HcINV30-HcINV33	MA	0.568111	2.50533	0.226761	0	1701
HcINV22-HcINV33	MA	0.567762	2.51004	0.226196	0	1701
HcINV11-HcINV6	MA	0.577089	2.55908	0.225506	0	1329
HcINV11-HcINV25	MA	0.572115	2.54049	0.225199	0	1422
HcINV11-HcINV4	MA	0.581406	2.59109	0.224386	0	1422
HcINV22-HcINV25	MA	0.564102	2.53226	0.222766	0	1716
HcINV11-HcINV2	MA	0.561545	2.52704	0.222214	0	1419
HcINV11-HcINV20	MA	0.560254	2.54479	0.220157	0	1434
HcINV32-HcINV33	MA	0.552417	2.52995	0.218351	0	1482
HcINV1-HcINV6	MA	0.341198	1.57159	0.217103	6.22694e-93	1125
HcINV1-HcINV22	MA	0.553954	2.554	0.216896	0	1242
HcINV1-HcINV32	MA	0.551668	2.55511	0.215907	0	1239
HcINV26-HcINV8	MA	0.34983	1.62045	0.215884	1.3401e-157	1893
HcINV20-HcINV30	MA	0.547683	2.57599	0.212611	0	1713
HcINV1-HcINV10	MA	0.551477	2.60636	0.211589	0	1074
HcINV14-HcINV25	MA	0.550598	2.61083	0.21089	0	1533
HcINV1-HcINV30	MA	0.539839	2.58496	0.208838	0	1242
HcINV2-HcINV6	MA	0.336002	1.61037	0.208649	3.78614e-137	1623
HcINV31-HcINV33	MA	0.545257	2.61755	0.208308	0	1665
HcINV20-HcINV31	MA	0.535859	2.60677	0.205564	0	1704
HcINV10-HcINV17	MA	0.339264	1.65574	0.204902	5.05132e-121	1344
HcINV20-HcINV22	MA	0.53554	2.62386	0.204104	0	1713
HcINV14-HcINV33	MA	0.537726	2.64759	0.2031	0	1524
HcINV20-HcINV32	MA	0.527892	2.61452	0.201908	0	1515
HcINV14-HcINV2	MA	0.54167	2.68842	0.201482	0	1527
HcINV14-HcINV26	MA	0.536721	2.66609	0.201314	0	1521
HcINV14-HcINV20	MA	0.533286	2.73287	0.195138	0	1530
HcINV1-HcINV7	MA	0.332372	1.71339	0.193985	1.04505e-107	1125
HcINV1-HcINV11	MA	0.522733	2.71663	0.192419	0	1188
HcINV26-HcINV4	MA	0.348971	1.84557	0.189086	5.96487e-194	1887
HcINV10-HcINV31	MA	0.246822	1.32994	0.185589	7.6974e-117	1560
HcINV15-HcINV31	MA	0.269001	1.45069	0.18543	8.91098e-139	1686
HcINV26-HcINV6	MA	0.330042	1.80228	0.183125	3.58348e-173	1635
HcINV28-HcINV9	MA	0.526441	2.89912	0.181587	0	1347
HcINV15-HcINV17	MA	0.353146	1.94558	0.181512	1.00142e-155	1344
HcINV2-HcINV7	MA	0.328491	1.82464	0.18003	1.38758e-168	1623
HcINV27-HcINV35	MA	0.50647	2.81697	0.179793	0	1341
HcINV27-HcINV28	MA	0.511444	2.86066	0.178785	0	1341
HcINV35-HcINV9	MA	0.520337	2.93484	0.177297	0	1347
HcINV11-HcINV29	MA	0.259976	1.46718	0.177194	6.78945e-126	1425
HcINV15-HcINV30	MA	0.380455	2.15053	0.176912	0	1677
HcINV25-HcINV7	MA	0.279716	1.59837	0.175001	2.10489e-153	1614
HcINV19-HcINV27	MA	0.494446	2.84044	0.174073	0	1233
HcINV15-HcINV29	MA	0.461371	2.66041	0.173421	0	1686
HcINV19-HcINV9	MA	0.496417	2.89404	0.171531	0	1233
HcINV26-HcINV7	MA	0.341092	2.01474	0.169298	3.8147e-191	1623
HcINV15-HcINV32	MA	0.412217	2.44297	0.168736	0	1458
HcINV16-HcINV17	MA	0.33957	2.01726	0.168333	1.36958e-169	1344
HcINV1-HcINV14	MA	0.489255	2.92299	0.167382	0	1047
HcINV16-HcINV31	MA	0.241466	1.44565	0.167029	1.20758e-144	1665
HcINV13-HcINV23	MA	0.175095	1.05302	0.16628	2.08737e-87	1362
HcINV15-HcINV22	MA	0.379505	2.33509	0.162523	0	1677
HcINV4-HcINV8	MA	0.0375062	0.231734	0.16185	4.69273e-29	1908
HcINV25-HcINV6	MA	0.297309	1.8621	0.159663	5.07708e-181	1614
HcINV16-HcINV29	MA	0.432152	2.71187	0.159355	0	1662
HcINV20-HcINV33	MA	0.0455036	0.285956	0.159128	2.19894e-32	1719
HcINV21-HcINV28	MA	0.0560407	0.355122	0.157807	1.37948e-30	1347
HcINV1-HcINV26	MA	0.190056	1.21412	0.156538	6.38041e-105	1401
HcINV22-HcINV30	MA	0.00395043	0.0252891	0.156211	0.00030275	1734
HcINV13-HcINV9	MA	0.470903	3.03144	0.155339	0	1725
HcINV2-HcINV8	MA	0.321425	2.08138	0.154429	2.3065e-245	1872
HcINV21-HcINV35	MA	0.0540142	0.355244	0.152048	7.19391e-31	1347
HcINV17-HcINV31	MA	0.243934	1.63116	0.149547	2.02207e-142	1341
HcINV11-HcINV30	MA	0.176729	1.18251	0.149452	5.42327e-104	1425
HcINV11-HcINV16	MA	0.3951	2.66313	0.148359	0	1383
HcINV16-HcINV30	MA	0.368742	2.49562	0.147755	0	1665
HcINV11-HcINV22	MA	0.175274	1.18693	0.14767	3.70702e-105	1425
HcINV7-HcINV8	MA	0.324988	2.24901	0.144502	2.21572e-231	1629
HcINV2-HcINV26	MA	0.192143	1.35351	0.141959	1.76e-164	1914
HcINV29-HcINV31	MA	0.420933	2.96615	0.141912	0	1707
HcINV11-HcINV15	MA	0.383764	2.72107	0.141034	0	1386
HcINV17-HcINV29	MA	0.422434	3.02188	0.139792	0	1347
HcINV13-HcINV27	MA	0.429477	3.10071	0.138509	0	1683
HcINV10-HcINV29	MA	0.398053	2.91337	0.13663	0	1560
HcINV6-HcINV8	MA	0.324997	2.39344	0.135787	0	1644
HcINV2-HcINV25	MA	0.211672	1.5598	0.135705	8.75351e-190	1929
HcINV10-HcINV11	MA	0.345156	2.54383	0.135684	0	1305
HcINV24-HcINV27	MA	0.430254	3.18918	0.13491	0	780
HcINV12-HcINV27	MA	0.421665	3.1428	0.134169	0	1629
HcINV27-HcINV34	MA	0.421683	3.14642	0.13402	0	1629
HcINV24-HcINV9	MA	0.402365	3.0342	0.13261	0	780
HcINV4-HcINV7	MA	0.30955	2.36144	0.131085	0	1629
HcINV14-HcINV32	MA	0.209343	1.59738	0.131054	1.06568e-136	1314
HcINV16-HcINV22	MA	0.368471	2.82664	0.130357	0	1665
HcINV12-HcINV23	MA	0.127259	0.979092	0.129977	4.89941e-84	1263
HcINV12-HcINV13	MA	0.0223397	0.173387	0.128843	2.89279e-22	1629
HcINV21-HcINV27	MA	0.414852	3.22349	0.128697	0	1659
HcINV23-HcINV34	MA	0.128843	1.00145	0.128657	5.21488e-87	1263
HcINV12-HcINV9	MA	0.414127	3.22287	0.128497	0	1629
HcINV34-HcINV9	MA	0.41361	3.21973	0.128461	0	1629
HcINV10-HcINV30	MA	0.336993	2.65679	0.126842	0	1560
HcINV21-HcINV9	MA	0.427335	3.37102	0.126767	0	1665
HcINV14-HcINV17	MA	0.398177	3.15426	0.126235	0	1332
HcINV13-HcINV34	MA	0.0214439	0.171558	0.124995	1.97739e-22	1629
HcINV23-HcINV24	MA	0.147327	1.19028	0.123775	1.15031e-65	780
HcINV11-HcINV32	MA	0.179487	1.45511	0.123349	3.7441e-129	1353
HcINV20-HcINV8	MA	0.365533	2.98416	0.122491	0	1830
HcINV16-HcINV32	MA	0.38683	3.18253	0.121548	0	1446
HcINV2-HcINV4	MA	0.34199	2.8315	0.12078	0	1866
HcINV20-HcINV4	MA	0.364436	3.04674	0.119615	0	1830
HcINV10-HcINV22	MA	0.334714	2.82986	0.118279	0	1560
HcINV31-HcINV32	MA	0.369399	3.13917	0.117674	0	1476
HcINV28-HcINV35	MA	0.00222226	0.0191235	0.116206	0.0023645	1347
HcINV4-HcINV6	MA	0.330197	2.85276	0.115746	0	1644
HcINV17-HcINV30	MA	0.376492	3.29645	0.114212	0	1347
HcINV10-HcINV32	MA	0.361121	3.17198	0.113847	0	1335
HcINV14-HcINV30	MA	0.137639	1.20937	0.11381	1.04353e-123	1527
HcINV33-HcINV7	MA	0.34297	3.02827	0.113256	0	1605
HcINV14-HcINV22	MA	0.135334	1.20618	0.1122	7.694e-123	1527
HcINV17-HcINV22	MA	0.371311	3.32999	0.111505	0	1347
HcINV14-HcINV16	MA	0.339119	3.06013	0.110818	0	1476
HcINV1-HcINV4	MA	0.352762	3.19166	0.110526	0	1359
HcINV1-HcINV8	MA	0.352942	3.20885	0.10999	0	1365
HcINV22-HcINV31	MA	0.349257	3.2049	0.108976	0	1692
HcINV30-HcINV31	MA	0.346166	3.19902	0.10821	0	1692
HcINV1-HcINV20	MA	0.337248	3.1368	0.107513	0	1332
HcINV28-HcINV34	MA	0.171671	1.6066	0.106854	8.24671e-145	1311
HcINV14-HcINV29	MA	0.155489	1.4621	0.106346	3.76559e-153	1527
HcINV33-HcINV8	MA	0.332608	3.13386	0.106134	0	1728
HcINV17-HcINV32	MA	0.344499	3.25425	0.105861	0	1197
HcINV33-HcINV6	MA	0.339876	3.22175	0.105494	0	1605
HcINV14-HcINV15	MA	0.337102	3.21843	0.104741	0	1482
HcINV25-HcINV26	MA	0.187132	1.79656	0.104161	5.57646e-230	1929
HcINV20-HcINV6	MA	0.331168	3.20842	0.103218	0	1605
HcINV20-HcINV7	MA	0.33009	3.20976	0.102839	0	1605
HcINV33-HcINV4	MA	0.332224	3.25097	0.102192	0	1728
HcINV2-HcINV20	MA	0.318671	3.13991	0.10149	0	1827
HcINV11-HcINV17	MA	0.333321	3.3072	0.100786	0	1092
HcINV1-HcINV25	MA	0.212933	2.11444	0.100704	1.89734e-203	1413
HcINV12-HcINV28	MA	0.170544	1.71685	0.0993349	6.20386e-157	1311
HcINV11-HcINV31	MA	0.330742	3.35027	0.0987209	0	1401
HcINV34-HcINV35	MA	0.167319	1.71155	0.0977588	4.25085e-160	1311
HcINV21-HcINV23	MA	0.169712	1.80349	0.0941023	3.09538e-179	1302
HcINV10-HcINV14	MA	0.331619	3.59721	0.0921878	0	1479
HcINV12-HcINV35	MA	0.165616	1.82237	0.0908795	1.36058e-172	1311
HcINV23-HcINV35	MA	0.162822	1.80389	0.0902611	8.61956e-172	1299
HcINV25-HcINV8	MA	0.285037	3.22816	0.088297	0	1869
HcINV13-HcINV35	MA	0.172648	1.9605	0.0880631	2.45193e-181	1341
HcINV2-HcINV33	MA	0.291758	3.32336	0.0877899	0	1716
HcINV13-HcINV28	MA	0.173767	1.97962	0.087778	5.24426e-178	1341
HcINV20-HcINV26	MA	0.293934	3.39092	0.0866825	0	1821
HcINV23-HcINV28	MA	0.164163	1.90448	0.0861982	1.17757e-182	1299
HcINV1-HcINV33	MA	0.293102	3.50965	0.0835131	0	1221
HcINV25-HcINV4	MA	0.277403	3.35967	0.0825687	0	1857
HcINV14-HcINV31	MA	0.273912	3.3973	0.0806263	0	1494
HcINV20-HcINV25	MA	0.276205	3.4552	0.0799389	0	1830
HcINV26-HcINV33	MA	0.270794	3.49974	0.0773756	0	1722
HcINV27-HcINV9	MA	0.265587	3.64929	0.0727776	0	1743
HcINV13-HcINV19	MA	0.263085	3.66033	0.0718748	0	1224
HcINV19-HcINV23	MA	0.256725	3.74918	0.0684749	0	1233
HcINV25-HcINV33	MA	0.248282	3.65904	0.0678546	0	1728
HcINV19-HcINV21	MA	0.259922	3.86804	0.0671973	0	1218
HcINV19-HcINV28	MA	0.255424	3.83456	0.066611	0	1218
HcINV19-HcINV35	MA	0.253981	3.85268	0.0659231	0	1218
HcINV21-HcINV34	MA	0.10534	1.65239	0.0637498	1.20307e-199	1629
HcINV12-HcINV21	MA	0.104576	1.65614	0.0631445	7.50231e-201	1629
HcINV12-HcINV19	MA	0.226126	3.62713	0.062343	0	1188
HcINV19-HcINV34	MA	0.224642	3.63018	0.0618817	0	1188
HcINV19-HcINV24	MA	0.211339	3.82327	0.055277	0	780
HcINV13-HcINV21	MA	0.1069	2.20099	0.048569	5.90016e-242	1659
HcINV24-HcINV35	MA	0.175843	3.9954	0.0440114	0	777
HcINV24-HcINV28	MA	0.178776	4.1551	0.0430257	0	777
HcINV21-HcINV24	MA	0.177156	4.24363	0.0417463	0	777
HcINV12-HcINV34	MA	0.000886721	0.0230995	0.0383871	2.76479e-05	1629
