# Supplementary material for: Genome-wide identification and characterization of the sucrose invertase gene family in Hemerocallis citrina
Source: PeerJ. 2024 Aug 29;12:e17999. doi: 10.7717/peerj.17999 (PMC11366234; doi:10.7717/peerj.17999)
Supplement: Supplemental Information 12 [file peerj-12-17999-s012.xls]

## Sheet: Sheet1
ITEM TO CHECK	IMPORTANCE	CHECKLIST
EXPERIMENTAL DESIGN
Definition of experimental and control groups	E	p8,214-216,240
Number within each group	E	p8,217
Assay carried out by core lab or investigator's lab?	D
Acknowledgement of authors' contributions	D
SAMPLE
Description	E	p8,212-216
Volume/mass of sample processed	D
Microdissection or macrodissection	E	p8,212-216
Processing procedure	E	p8,214-218
If frozen - how and how quickly?	E	p8,214-218
If fixed - with what, how quickly?	E	p8,214-218
Sample storage conditions and duration (especially for FFPE samples)	E	p8,214-218
NUCLEIC ACID EXTRACTION
Procedure and/or instrumentation	E	p8,229-231
Name of kit and details of any modifications	E	p8,229-231
Source of additional reagents used	D
Details of DNase or RNAse treatment	E	p8,229-231
Contamination assessment (DNA or RNA)	E	p8,230-233
Nucleic acid quantification	E	p8,230-233
Instrument and method	E	p8,231-232
Purity (A260/A280)	D
Yield	D
RNA integrity method/instrument	E	p8,230-232
RIN/RQI or Cq of 3' and 5' transcripts	E	p8,231-232
Electrophoresis traces	D
Inhibition testing (Cq dilutions, spike or other)	E	p8,231-232
REVERSE TRANSCRIPTION
Complete reaction conditions	E	p8,231-232
Amount of RNA and reaction volume	E	p8,231-232
Priming oligonucleotide (if using GSP) and concentration	E	p8,231-232
Reverse transcriptase and concentration	E	p8,231-232
Temperature and time	E	p8,231-232
Manufacturer of reagents and catalogue numbers	D
Cqs with and without RT	D*
Storage conditions of cDNA	D
qPCR TARGET INFORMATION
If multiplex, efficiency and LOD of each assay.	E	p8,227-229
Sequence accession number	E	p8,227-229
Location of amplicon	D
Amplicon length	E	p8,233-234
In silico specificity screen (BLAST, etc)	E	p8,233-234
Pseudogenes, retropseudogenes or other homologs?	D
Sequence alignment	D
Secondary structure analysis of amplicon	D
Location of each primer by exon or intron (if applicable)	E	p8,233-234
What splice variants are targeted?	E	p8,233-234
qPCR OLIGONUCLEOTIDES
Primer sequences	E	p8,233-234
RTPrimerDB Identification Number	D
Probe sequences	D**
Location and identity of any modifications	E	p8,233-234
Manufacturer of oligonucleotides	D
Purification method	D
qPCR PROTOCOL
Complete reaction conditions	E	p8,237-239
Reaction volume and amount of cDNA/DNA	E	p8,237-239
Primer, (probe), Mg++ and dNTP concentrations	E	p8,237-239
Polymerase identity and concentration	E	p8,237-239
Buffer/kit identity and manufacturer	E	p8,237-239
Exact chemical constitution of the buffer	D
Additives (SYBR Green I, DMSO, etc.)	E	p8,237-239
Manufacturer of plates/tubes and catalog number	D
Complete thermocycling parameters	E	p8,237-239
Reaction setup (manual/robotic)	D
Manufacturer of qPCR instrument	E	p8,237-239
qPCR VALIDATION
Evidence of optimisation (from gradients)	D
Specificity (gel, sequence, melt, or digest)	E	supplemental file.
For SYBR Green I, Cq of the NTC	E	supplemental file.
Standard curves with slope and y-intercept	E	supplemental file.
PCR efficiency calculated from slope	E	supplemental file.
Confidence interval for PCR efficiency or standard error	D
r2 of standard curve	E	supplemental file.
Linear dynamic range	E	supplemental file.
Cq variation at lower limit	E	supplemental file.
Confidence intervals throughout range	D
Evidence for limit of detection	E	supplemental file.
If multiplex, efficiency and LOD of each assay.	E	supplemental file.
DATA ANALYSIS
qPCR analysis program (source, version)	E	p9,239-240
Cq method determination	E	p9,239-240
Outlier identification and disposition	E	p9,239-240
Results of NTCs	E	p9,239-240
Justification of number and choice of reference genes	E	p9,239-240
Description of normalisation method	E	p9,239-240
Number and concordance of biological replicates	D
Number and stage (RT or qPCR) of technical replicates	E	p8,217
Repeatability (intra-assay variation)	E	p8,217
Reproducibility (inter-assay variation, %CV)	D
Power analysis	D
Statistical methods for result significance	E	p9,239-240
Software (source, version)	E	p9,239-240
Cq or raw data submission using RDML	D
Table 1. MIQE checklist for authors, reviewers and editors. All essential information (E) must be submitted with the manuscript. Desirable
information (D) should be submitted if available. If using primers obtained from RTPrimerDB, information on qPCR target, oligonucleotides,
protocols and validation is available from that source.
*: Assessing the absence of DNA using a no RT assay is essential when first extracting RNA. Once the sample has been validated as
RDNA-free, inclusion of a no-RT control is desirable, but no longer essential.
**: Disclosure of the probe sequence is highly desirable and strongly encouraged. However, since not all commercial pre-designed assay
vendors provide this information, it cannot be an essential requirement. Use of such assays is advised against.
