# Supplementary material for: Genome-wide identification and characterization of the sucrose invertase gene family in Hemerocallis citrina
Source: PeerJ. 2024 Aug 29;12:e17999. doi: 10.7717/peerj.17999 (PMC11366234; doi:10.7717/peerj.17999)
Supplement: Supplemental Information 13 [file peerj-12-17999-s013.xlsx]

## Sheet: Sheet1
Sample Name	Target Name	Reporter	Cт	Cт Mean	Internal reference Mean	2-⊿⊿Ct	Sample Name	Fold Mean	SD
S-1-1	HHCINV3	SYBR	17.5947	17.7492	15.566	1	S-1	1	0
S-1-2	HHCINV3	SYBR	17.898	17.7492	15.566	1		1
S-1-3	HHCINV3	SYBR	17.7551	17.7492	15.566	1		1
S-2-1	HHCINV3	SYBR	23.1901	23.1385	17.8129	0.1092	S-2	0.113267	0.00496521
S-2-2	HHCINV3	SYBR	23.0687	23.1385	17.8129	0.1188
S-2-3	HHCINV3	SYBR	23.1567	23.1385	17.8129	0.1118
S-3-1	HHCINV3	SYBR	27.8125	27.8823	18.127	0.0055	S-3	0.00523333	0.00023094
S-3-2	HHCINV3	SYBR	27.9246	27.8823	18.127	0.0051
S-3-3	HHCINV3	SYBR	27.9097	27.8823	18.127	0.0051
S-4-1	HHCINV3	SYBR	22.231	22.3784	17.3122	0.1501	S-4	0.1378	0.0284216
S-4-2	HHCINV3	SYBR	22.1569	22.3784	17.3122	0.158
S-4-3	HHCINV3	SYBR	22.7472	22.3784	17.3122	0.1053
S-1-1	HHCINV6	SYBR	16.1363	16.7476	15.566	1	S-1	1	0
S-1-2	HHCINV6	SYBR	16.6857	16.7476	15.566	1		1
S-1-3	HHCINV6	SYBR	17.4207	16.7476	15.566	1		1
S-2-1	HHCINV6	SYBR	25.1836	25.0931	17.8129	0.0137	S-2	0.1087	0.0905823
S-2-2	HHCINV6	SYBR	25.4047	25.0931	17.8129	0.1183
S-2-3	HHCINV6	SYBR	24.6909	25.0931	17.8129	0.1941
S-3-1	HHCINV6	SYBR	27.5891	27.2411	18.127	0.0032	S-3	0.00433333	0.00187705
S-3-2	HHCINV6	SYBR	26.5813	27.2411	18.127	0.0065
S-3-3	HHCINV6	SYBR	27.553	27.2411	18.127	0.0033
S-4-1	HHCINV6	SYBR	28.5713	28.3847	17.3122	0.0009	S-4	0.0011	0.00052915
S-4-2	HHCINV6	SYBR	27.6614	28.3847	17.3122	0.0017
S-4-3	HHCINV6	SYBR	28.9215	28.3847	17.3122	0.0007
S-1-1	HHCINV9	SYBR	32.8671	32.5328	15.566	1	S-1	1	0
S-1-2	HHCINV9	SYBR	32.7029	32.5328	15.566	1
S-1-3	HHCINV9	SYBR	32.0285	32.5328	15.566	1
S-2-1	HHCINV9	SYBR	32.2438	32.4422	17.8129	5.795	S-2	5.1173	0.97339
S-2-2	HHCINV9	SYBR	32.7778	32.4422	17.8129	4.0019
S-2-3	HHCINV9	SYBR	32.305	32.4422	17.8129	5.555
S-3-1	HHCINV9	SYBR	29.3581	29.4152	18.127	53.2603	S-3	52.0814	11.5492
S-3-2	HHCINV9	SYBR	29.1158	29.4152	18.127	62.996
S-3-3	HHCINV9	SYBR	29.7716	29.4152	18.127	39.988
S-4-1	HHCINV9	SYBR	30.5214	30.7129	17.3122	13.517	S-4	11.9152	1.65368
S-4-2	HHCINV9	SYBR	30.6915	30.7129	17.3122	12.0144
S-4-3	HHCINV9	SYBR	30.9257	30.7129	17.3122	10.2141
S-1-1	HHCINV11	SYBR	24.0301	24.1504	15.566	1	S-1	1	0
S-1-2	HHCINV11	SYBR	24.1481	24.1504	15.566	1
S-1-3	HHCINV11	SYBR	24.2729	24.1504	15.566	1
S-2-1	HHCINV11	SYBR	26.0728	26.0852	17.8129	1.252	S-2	1.2422	0.0579251
S-2-2	HHCINV11	SYBR	26.1582	26.0852	17.8129	1.18
S-2-3	HHCINV11	SYBR	26.0245	26.0852	17.8129	1.2946
S-3-1	HHCINV11	SYBR	29.1437	29.3972	18.127	0.1852	S-3	0.1613	0.0498501
S-3-2	HHCINV11	SYBR	29.0716	29.3972	18.127	0.1947
S-3-3	HHCINV11	SYBR	29.9764	29.3972	18.127	0.104
S-4-1	HHCINV11	SYBR	28.1845	28.7177	17.3122	0.2047	S-4	0.1498	0.0584218
S-4-2	HHCINV11	SYBR	28.5735	28.7177	17.3122	0.1563
S-4-3	HHCINV11	SYBR	29.3952	28.7177	17.3122	0.0884
S-1-1	HHCINV15	SYBR	22.0853	21.7164	15.566	1	S-1	1	0
S-1-2	HHCINV15	SYBR	22.1822	21.7164	15.566	1
S-1-3	HHCINV15	SYBR	20.8817	21.7164	15.566	1
S-2-1	HHCINV15	SYBR	20.2771	20.3819	17.8129	12.8714	S-2	12.0829	1.86279
S-2-2	HHCINV15	SYBR	20.2168	20.3819	17.8129	13.4217
S-2-3	HHCINV15	SYBR	20.6517	20.3819	17.8129	9.9555
S-3-1	HHCINV15	SYBR	22.7179	22.341	18.127	2.9477	S-3	4.00107	1.51883
S-3-2	HHCINV15	SYBR	22.5493	22.341	18.127	3.3134
S-3-3	HHCINV15	SYBR	21.7559	22.341	18.127	5.7421
S-4-1	HHCINV15	SYBR	22.9988	23.2684	17.3122	1.3791	S-4	1.21337	0.151631
S-4-2	HHCINV15	SYBR	23.2245	23.2684	17.3122	1.1794
S-4-3	HHCINV15	SYBR	23.5819	23.2684	17.3122	1.0816
S-1-1	HHCINV34	SYBR	17.683	18.1235	15.566	1	S-1	1	0
S-1-2	HHCINV34	SYBR	18.502	18.1235	15.566	1		1	0
S-1-3	HHCINV34	SYBR	18.1856	18.1235	15.566	1		1	0
S-2-1	HHCINV34	SYBR	19.8733	19.601	17.8129	1.4113	S-2	1.75283	0.52868
S-2-2	HHCINV34	SYBR	19.7994	19.601	17.8129	1.4854
S-2-3	HHCINV34	SYBR	19.1304	19.601	17.8129	2.3618
S-3-1	HHCINV34	SYBR	23.1872	23.295	18.127	0.1764	S-3	0.165533	0.029255
S-3-2	HHCINV34	SYBR	23.6013	23.295	18.127	0.1324
S-3-3	HHCINV34	SYBR	23.0965	23.295	18.127	0.1878
S-4-1	HHCINV34	SYBR	22.2564	22.6279	17.3122	0.1912	S-4	0.150967	0.0381149
S-4-2	HHCINV34	SYBR	22.6425	22.6279	17.3122	0.1463
S-4-3	HHCINV34	SYBR	22.9847	22.6279	17.3122	0.1154
S-1-1	GAPDH	SYBR	15.4504		15.566
S-1-2	GAPDH	SYBR	15.6419		15.566
S-1-3	GAPDH	SYBR	15.6058		15.566
S-2-1	GAPDH	SYBR	17.9667		17.8129
S-2-2	GAPDH	SYBR	17.7229		17.8129
S-2-3	GAPDH	SYBR	17.7491		17.8129
S-3-1	GAPDH	SYBR	18.0849		18.127
S-3-2	GAPDH	SYBR	17.9973		18.127
S-3-3	GAPDH	SYBR	18.2989		18.127
S-4-1	GAPDH	SYBR	17.3563		17.3122
S-4-2	GAPDH	SYBR	17.2842		17.3122
S-4-3	GAPDH	SYBR	17.2963		17.3122
fold=2-△△Ct=2-[（targetX treatmentCt-internal reference treatment Ct）-(targetX mock Ct-internal reference mock Ct)]
